# Supplementary material for: Multicomponent synthesis of pyroglutamic acid derivatives via Knoevenagel–Michael-hydrolysis-lactamization-decarboxylation (KMHL-D) sequence
Source: Royal Society of Chemistry journal article supplement (doi:10.1039/c8ob02473a), 2018-12-18
Supplement: c8ob02473a1.pdf [file c8ob02473a1.pdf]

# Multicomponent Synthesis of Pyroglutamic Acid Derivatives via Knoevenagel-Michael-Hydrolysis-Lactamization-Decarboxylation (KMHL- D) Sequence

Tushar M. Khopade, Prakash K. Warghude, Amol D. Sonawane and Ramakrishna G. Bhat\*

Department of Chemistry, Main Building, Indian Institute of Science Education and Research (IISER)-Pune, Dr. Homi  
Bhabha Road, Pashan, Pune, 411008, Maharashtra, India

## 1. Section 1

|                                                                                                 |               |
|-------------------------------------------------------------------------------------------------|---------------|
| <b><sup>1</sup>H NMR studies to prove the intermediates formation.....</b>                      | <b>S2-S4</b>  |
| <b>HRMS spectra of 4a' and 6a.....</b>                                                          | <b>S5</b>     |
| <b>Appendix I: Time dependent <sup>1</sup>H-NMR Studies to calculate the yields of 4a'.....</b> | <b>S6-S10</b> |
| <b>Appendix II-<sup>1</sup>H NMR Kinetic study of the formation of 4a'.....</b>                 | <b>S11</b>    |

## 2. Section 2

|                                                                       |                |
|-----------------------------------------------------------------------|----------------|
| <b>Experimental data of compounds 4a-4u.....</b>                      | <b>S12-S24</b> |
| <b>Application of the protocol: Deprotection of benzyl ester.....</b> | <b>S24</b>     |
| <b>Gram Scale Synthesis of compound 4a and 4h .....</b>               | <b>S25</b>     |

## 3. Section 3

|                                                                                            |                |
|--------------------------------------------------------------------------------------------|----------------|
| <b><sup>1</sup>H, <sup>13</sup>C Spectra of 4a-4u and 8.....</b>                           | <b>S26-S69</b> |
| <b>Molecular Structure of 4a<sub>trans</sub> Single Crystal X-ray Analytical data.....</b> | <b>S70-S71</b> |

## 4. References.....S72

## Section 1

### $^1\text{H}$ NMR studies to prove the intermediates formation

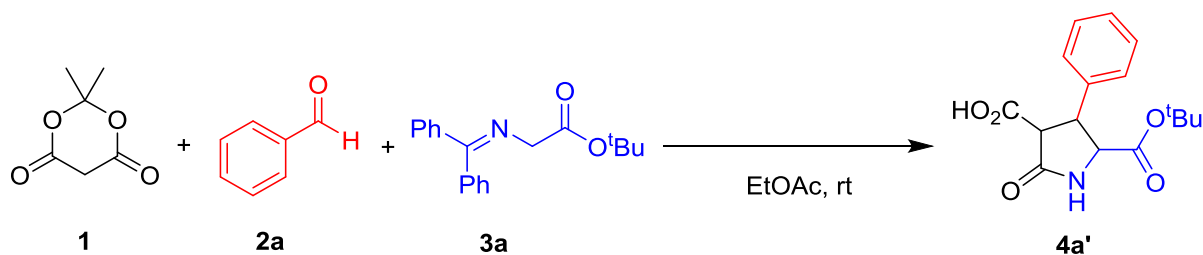

Reaction conditions: In an oven dried 10 mL round bottomed flask with a teflon-coated stir bar, Meldrum's acid **1** (200 mg, 1.39 mmol, 1 equiv.) was dissolved in 6 mL of EtOAc. Then benzaldehyde **2a** (150  $\mu\text{L}$ , 1.47 mmol, 1.06 equiv.) and Schiff's base **3a** (532.9 mg, 1.8 mmol, 1.3 equiv.) were added subsequently and the reaction mixture was stirred for 24 h at room temperature.

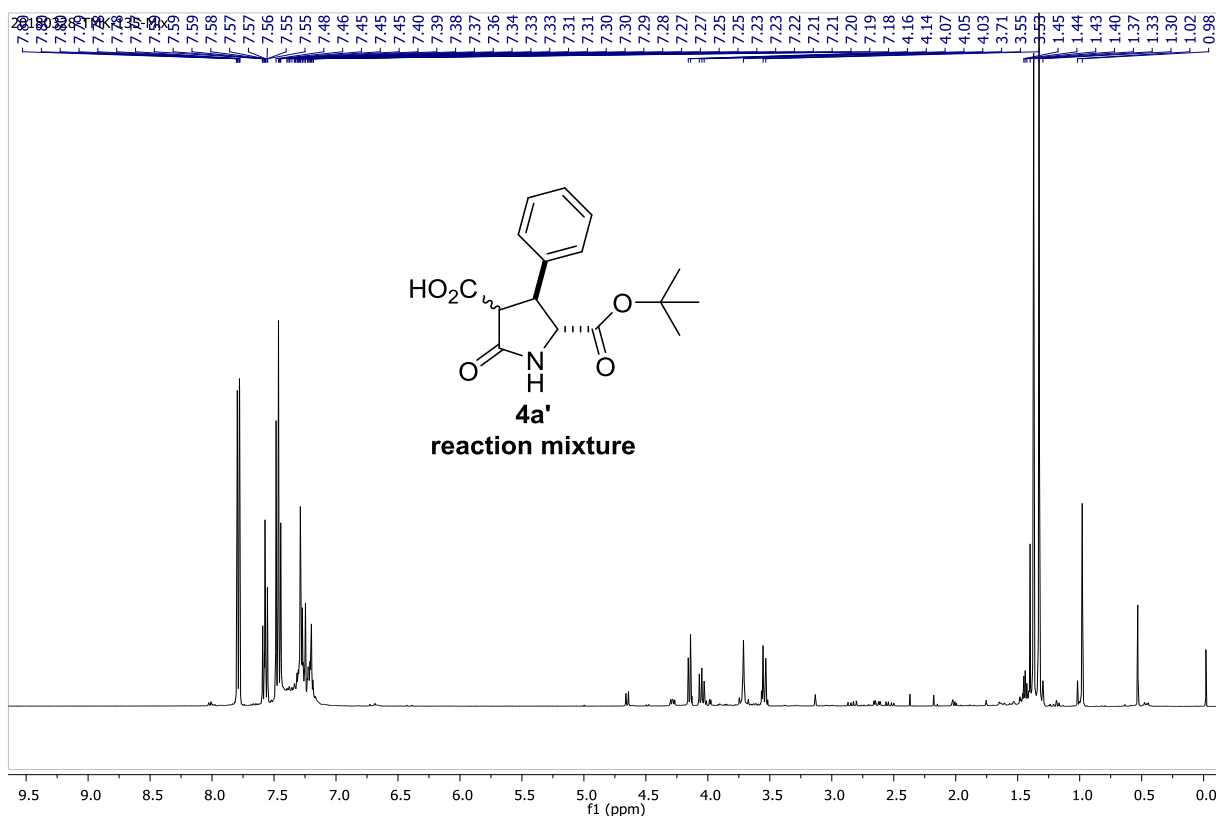

For  $^1\text{H}$  NMR 100  $\mu\text{L}$  of reaction mixture was taken out and evaporated. The resulting crude mixture was directly submitted for  $^1\text{H}$  NMR in  $\text{CDCl}_3$ .

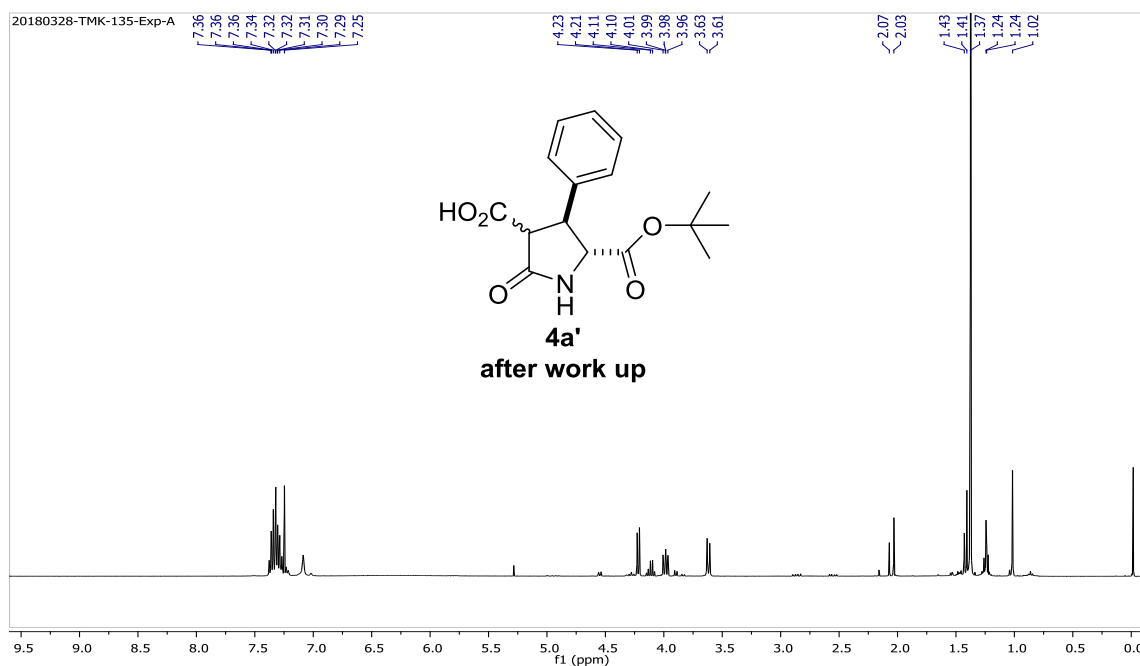

Conditions: Upon completion of the reaction (confirmed by TLC), the reaction mixture was directly transferred in to separating funnel. Then saturated aq.  $\text{NaHCO}_3$  solution (25 mL) and EtOAc (20 mL) were added to the separating funnel and extracted. The aqueous layer containing pyroglutamic acid derivative **4a'** was separated and the extraction procedure repeated twice. The combined aqueous layer was acidified with 1 N aq. HCl solution till it becomes a turbid solution ( $\sim$  pH 2). After which, the pyroglutamic acid derivative **4a'** was extracted with EtOAc (3 X 20 mL) and the combined organic layers was washed with brine solution and dried over anhydrous  $\text{Na}_2\text{SO}_4$ . The organic extract was evaporated under vacuo to afford crude **4a'**. The resulting crude **4a'** was directly submitted for  $^1\text{H}$  NMR in  $\text{CDCl}_3$ .

\*It is found that imine hydrolysis and lactamization of intermediate **6** takes place *in situ*.

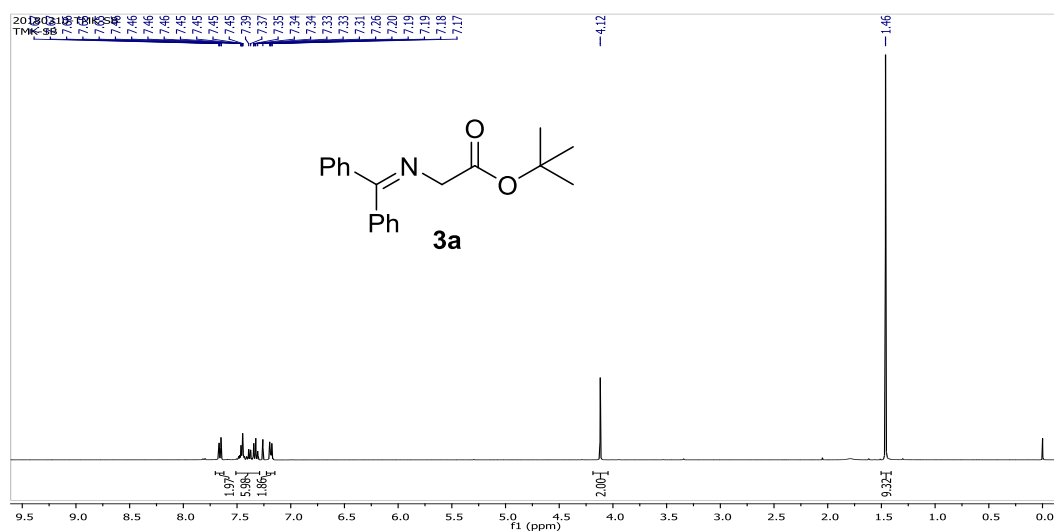

## Hydrolysis of Schiff's base **3a** catalysed of Meldrum's acid

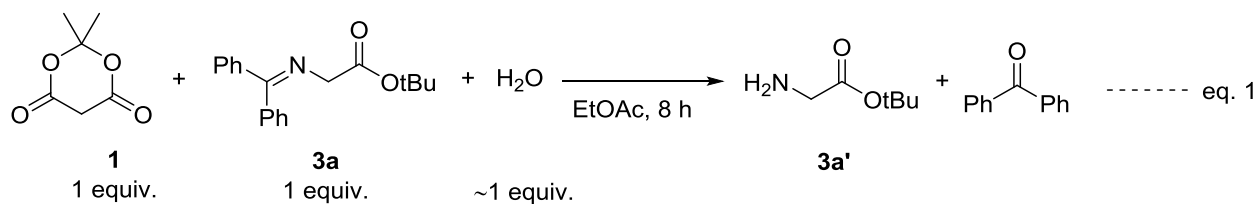

<sup>a</sup>Reaction Conditions: Meldrum's acid **1** (100 mg, 0.69 mmol, 1 equiv.), Schiff's base **3a** (205 mg, 0.69 mmol, 1 equiv.), H<sub>2</sub>O (15  $\mu$ L, 0.72 mmol, 1.04 equiv.) in 1 ml EtOAc for 8 h, then 100  $\mu$ L of reaction mixture was taken out and evaporated. The resulting crude mixture was directly submitted for <sup>1</sup>H NMR.

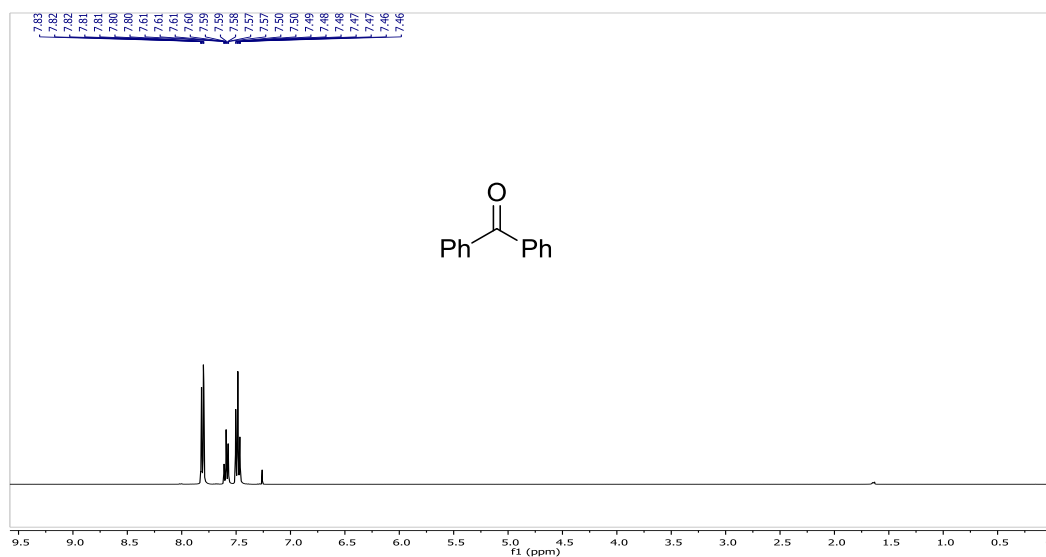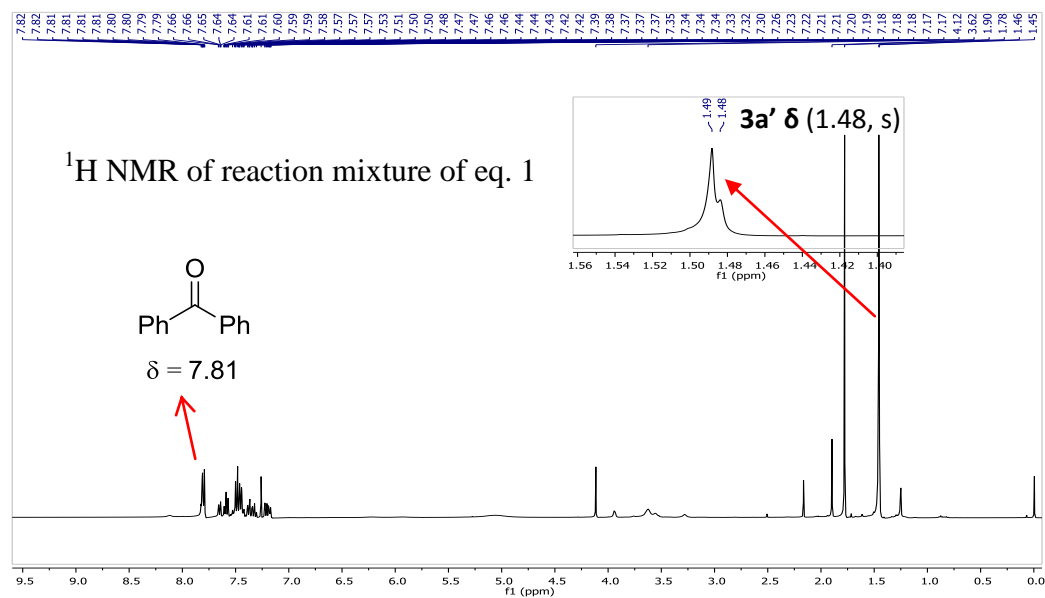

TMK 135B

IISER PUNE

1: TOF MS ES+  
1.02e3

TMK 135B 1 (0.052) AM2 (Ar,20000.0,556.28,0.00,LS 3); ABS; Sm (SG, 3x1.00)

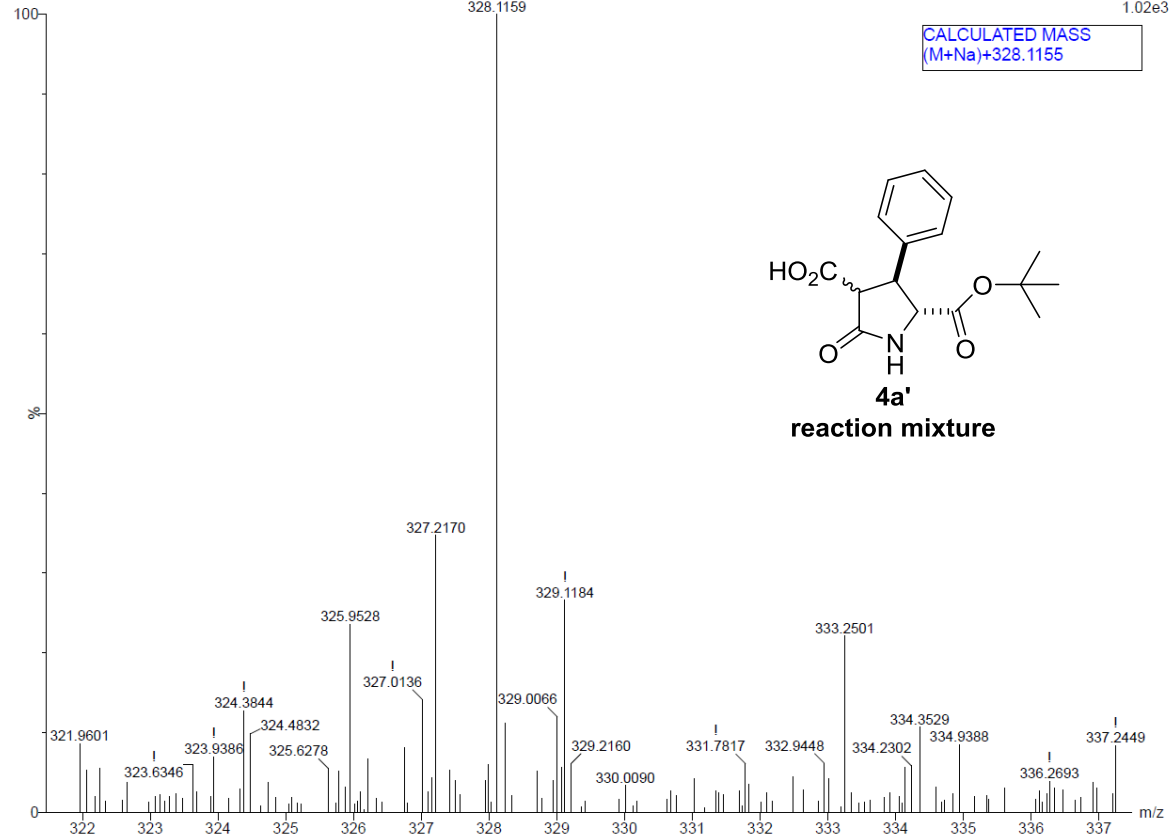

TMK 135A

IISER PUNE

1: TOF MS ES+  
6.17e4

TMK 135A 38 (0.723) AM2 (Ar,20000.0,556.28,0.00,LS 3); ABS; Sm (SG, 3x1.00)

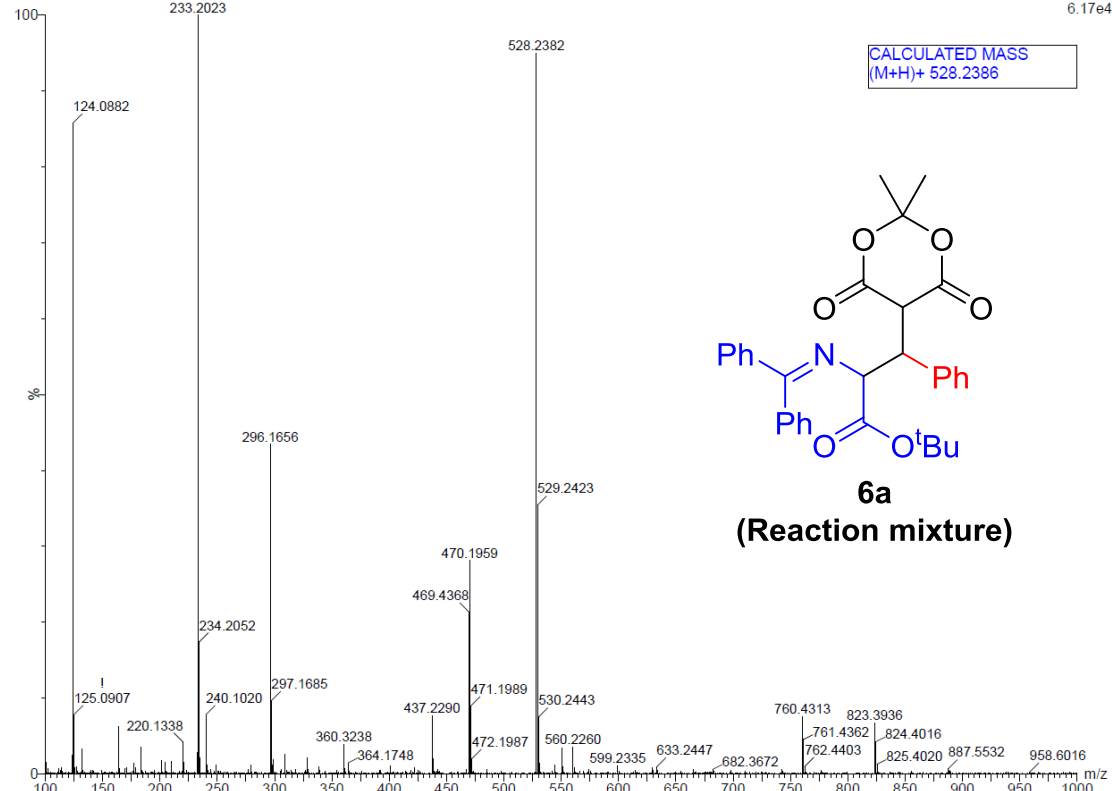

## Appendix I: Time dependent $^1\text{H}$ -NMR Studies to calculate the yields of **4a'**

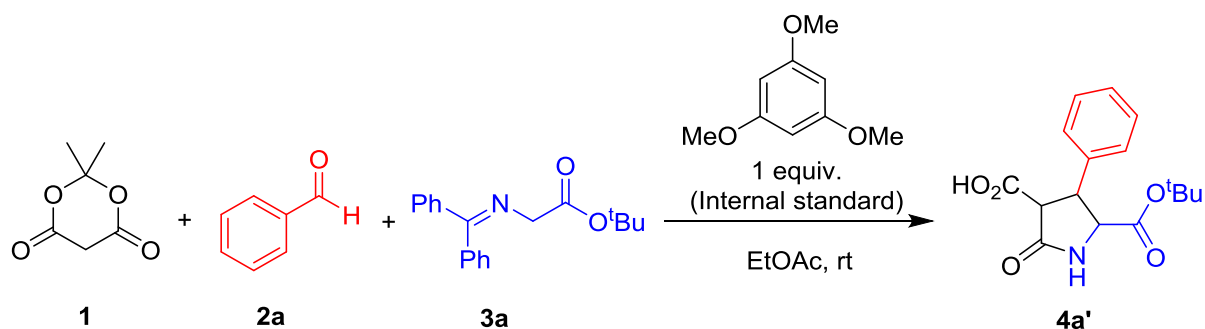

$^1\text{H}$  NMR kinetic experiments for the reaction of Meldrum's acid (300 mg, 2.08 mmol), Benzaldehyde (225  $\mu\text{L}$ , 2.19 mmol), Schiff's base **3** (799.3 mg, 2.71 mmol) and 1,3,5-trimethoxy benzene (350.1 mg, 2.08 mmol) in 8 ml ethyl acetate at room temperature (25  $^\circ\text{C}$ ). 1,3,5-Trimethoxy benzene (1 equiv.) was used an internal standard  $\delta$  (s, 6.09 3H, s, 3.76).  $^1\text{H}$ -NMR spectra were recorded over a period of time to study the formation of **4a'**. Yields were calculated with reference internal standard peak  $\delta$  (s, 6.09 3H). Based on the time dependent  $^1\text{H}$  NMR studies we observed that product **4a'** (diastereomers) formation increased significantly after one hour. Using the  $^1\text{H}$  NMR data kinetics of the reaction was studied (see Fig 2)

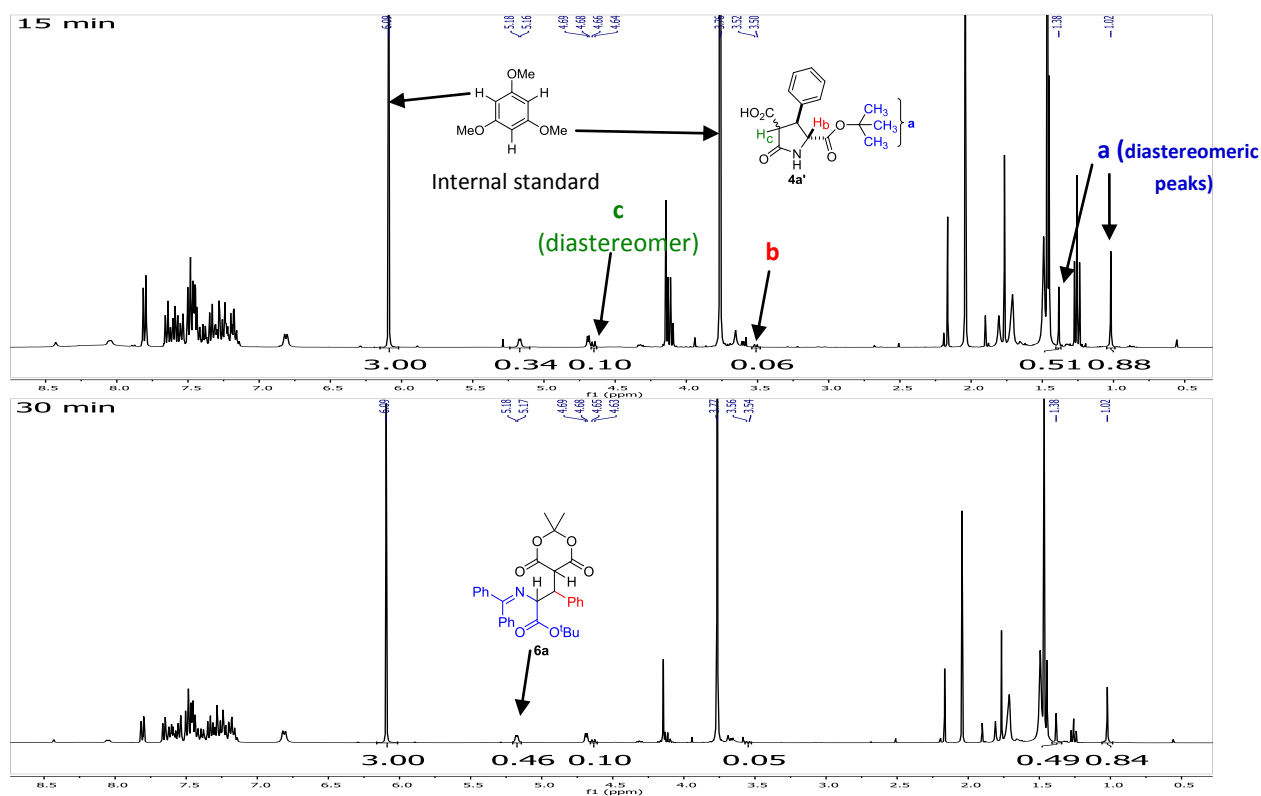

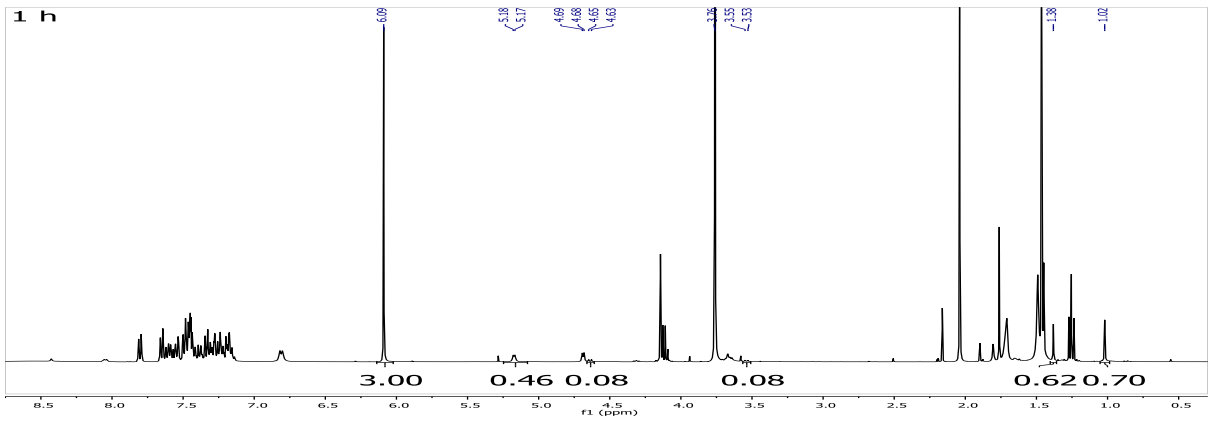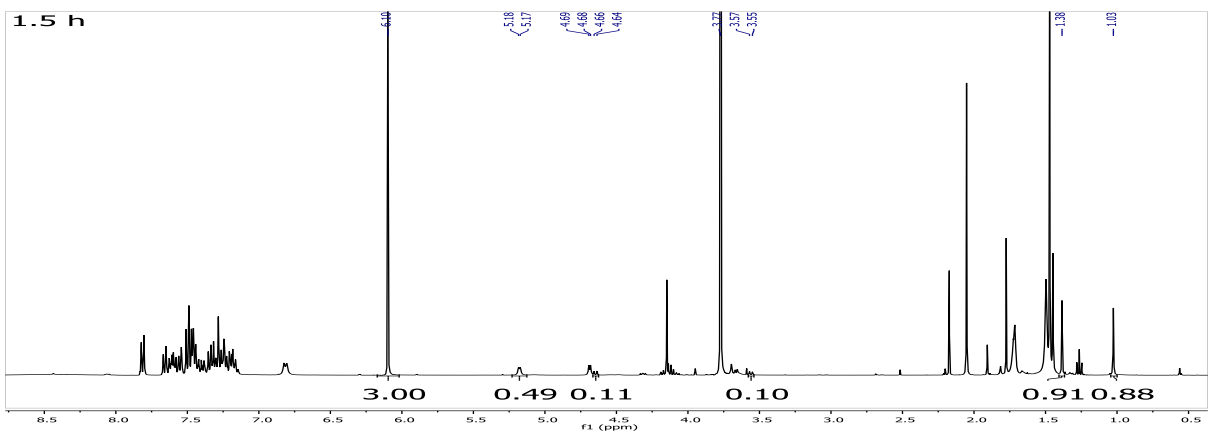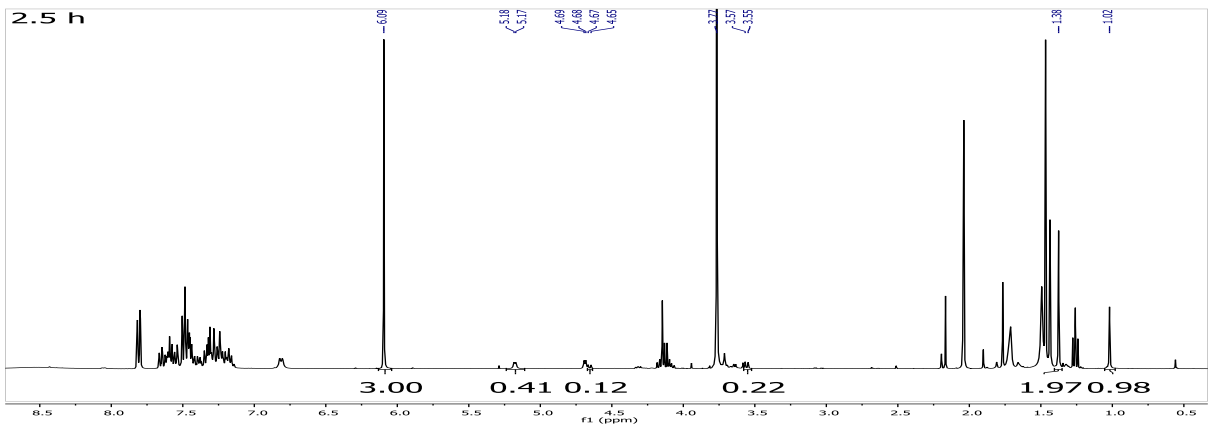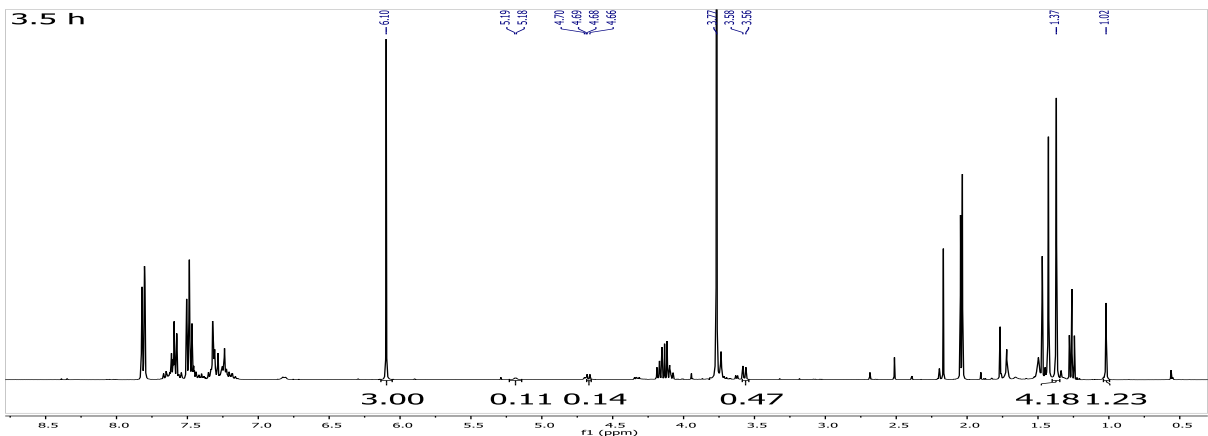

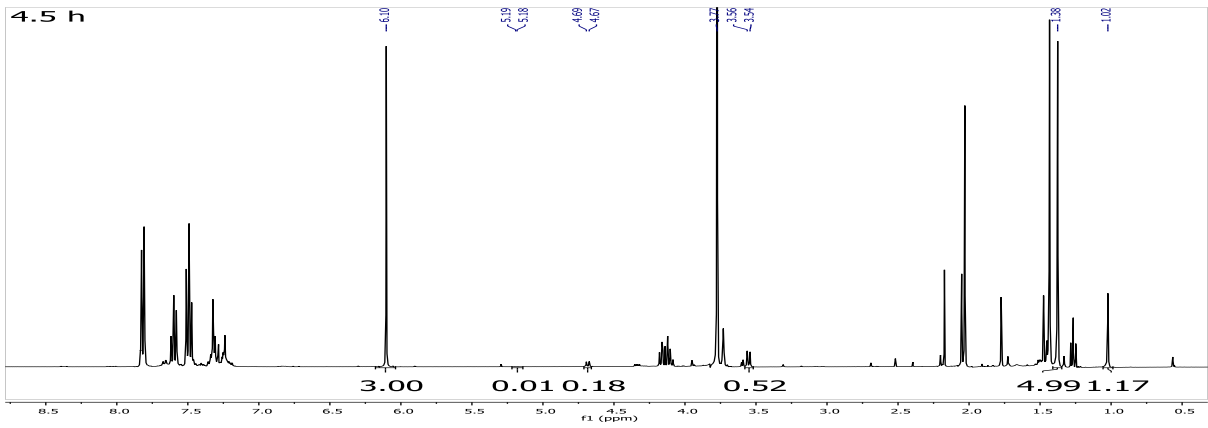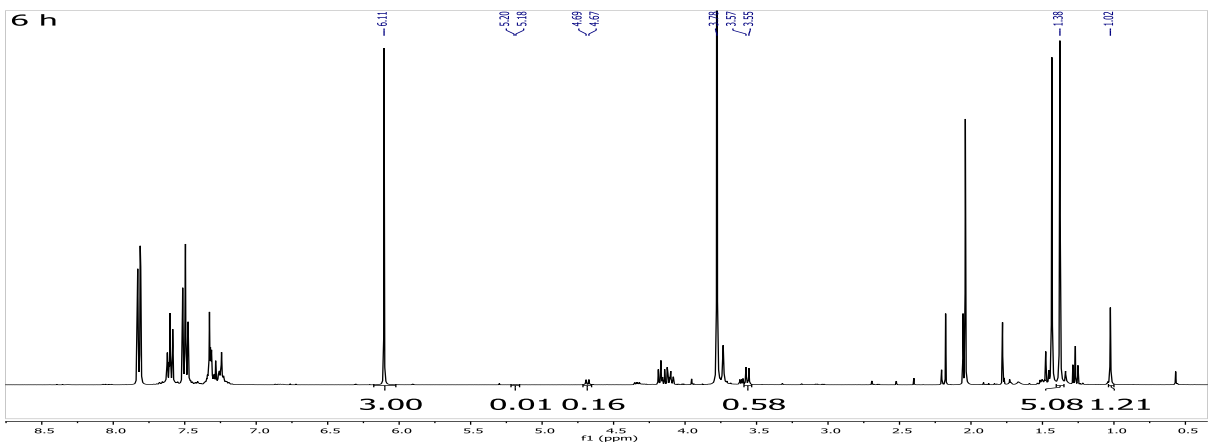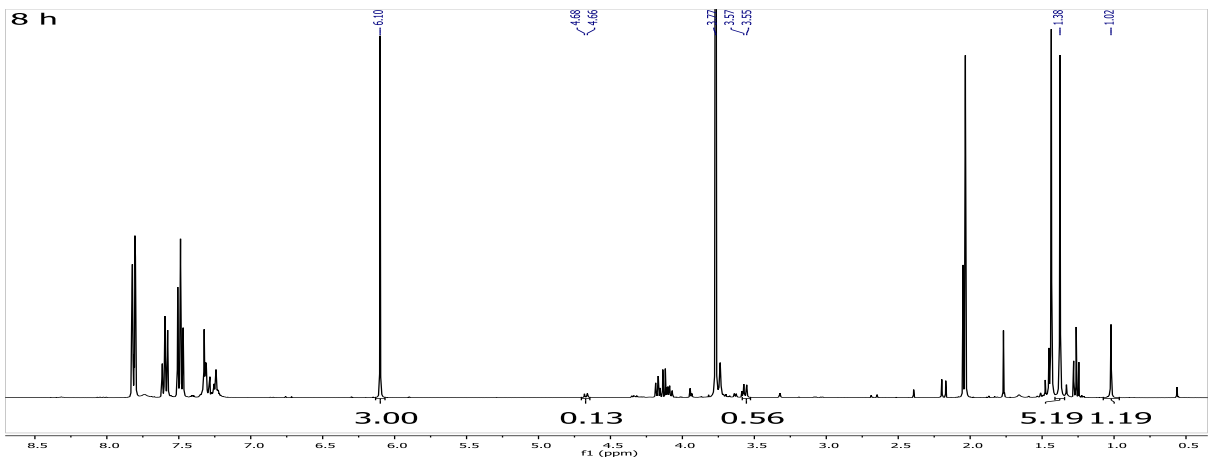



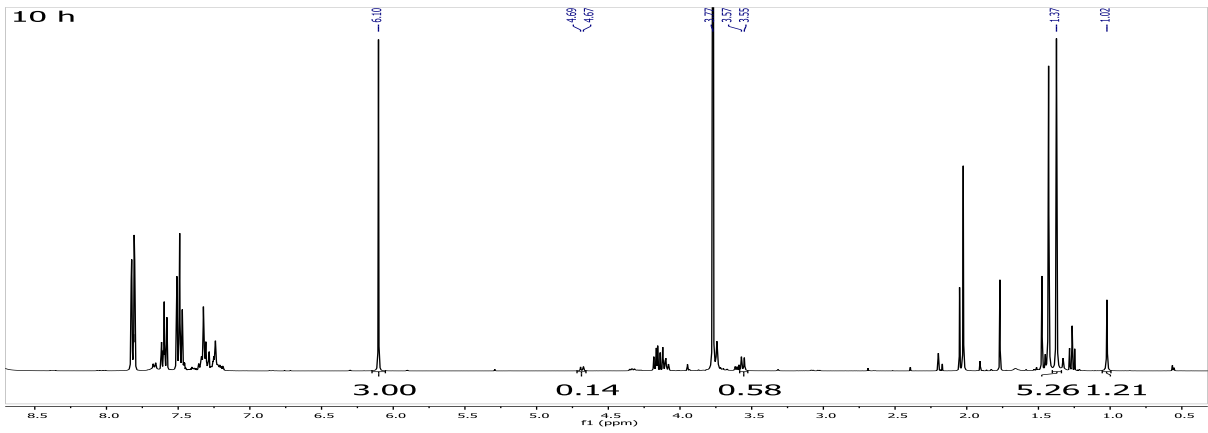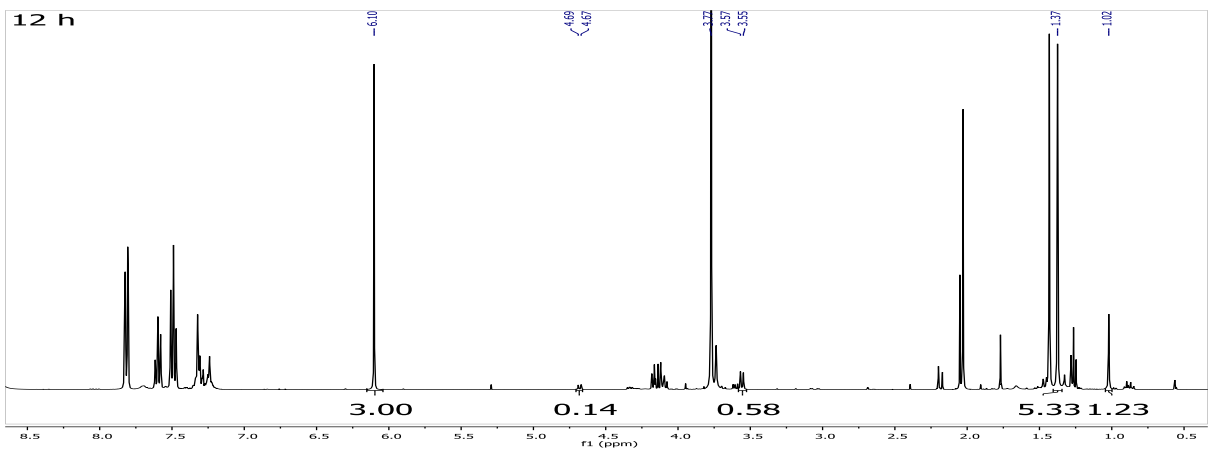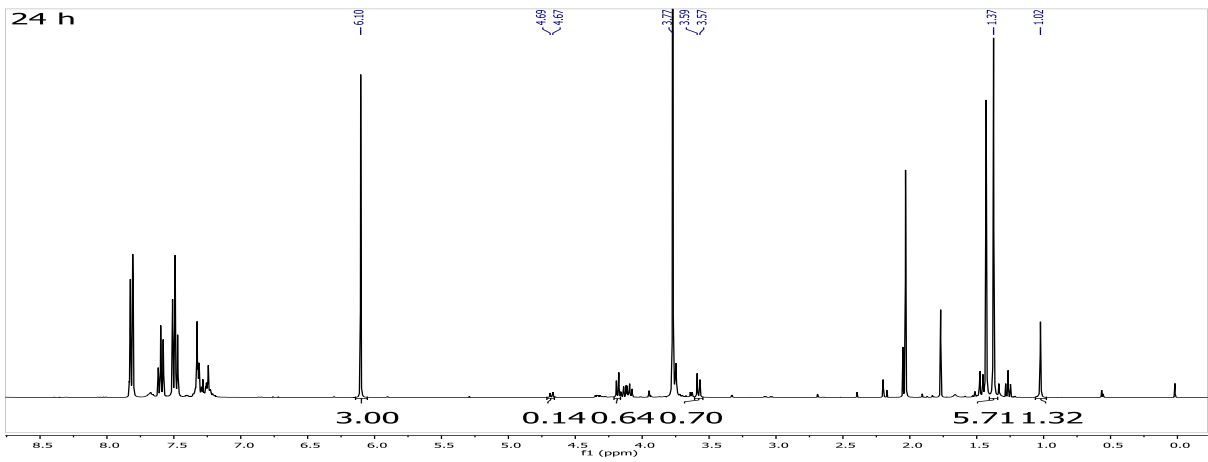

## Stacked spectra of reaction mixture at different time interval

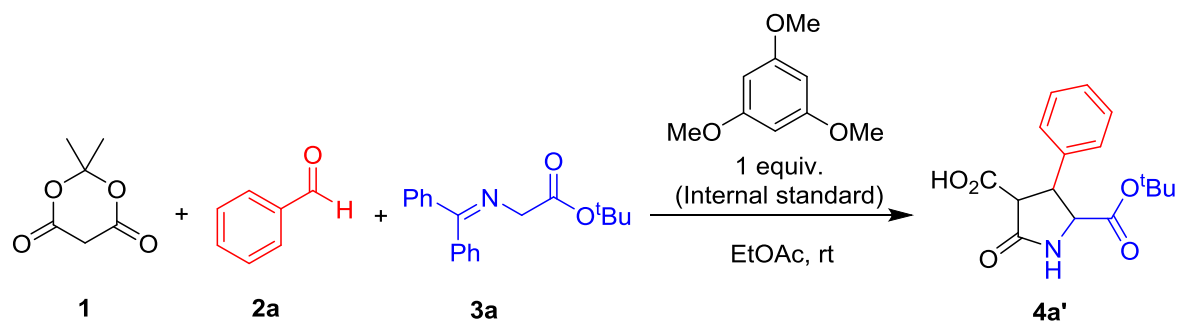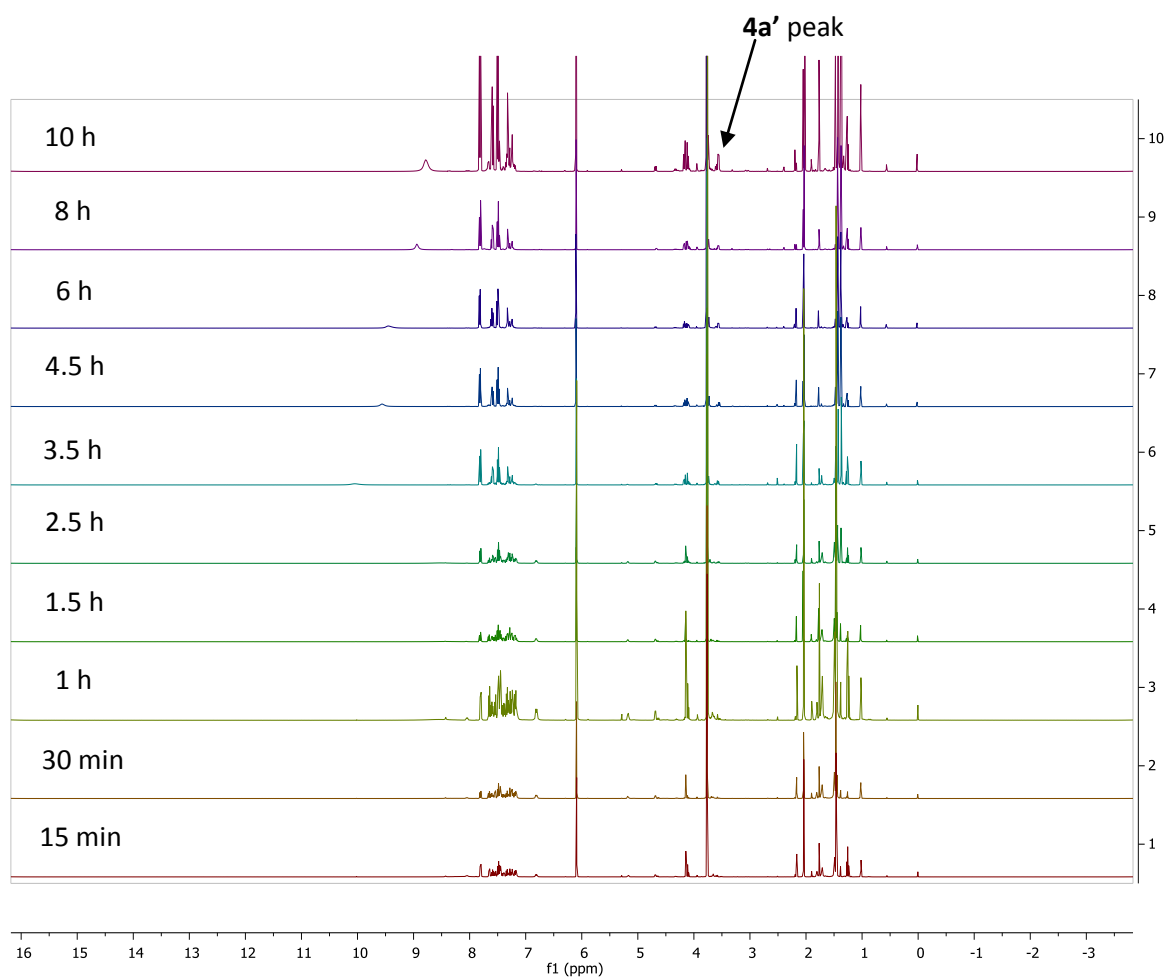

## Appendix II: $^1\text{H}$ NMR Kinetic study of the formation of **4a'**

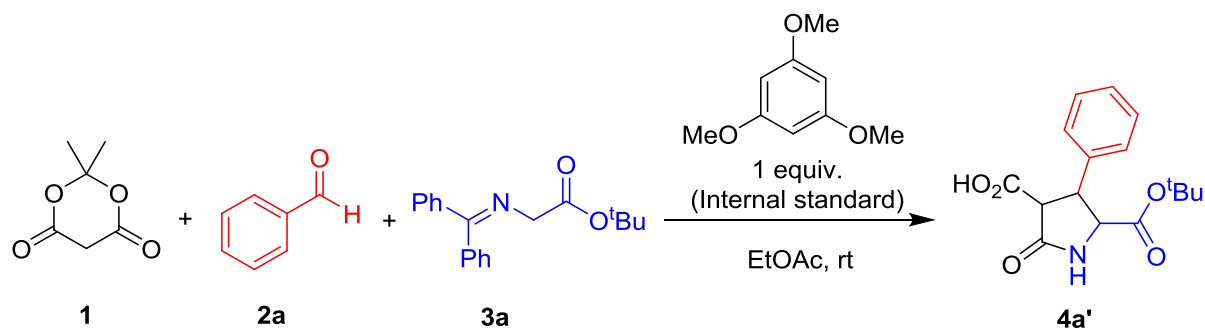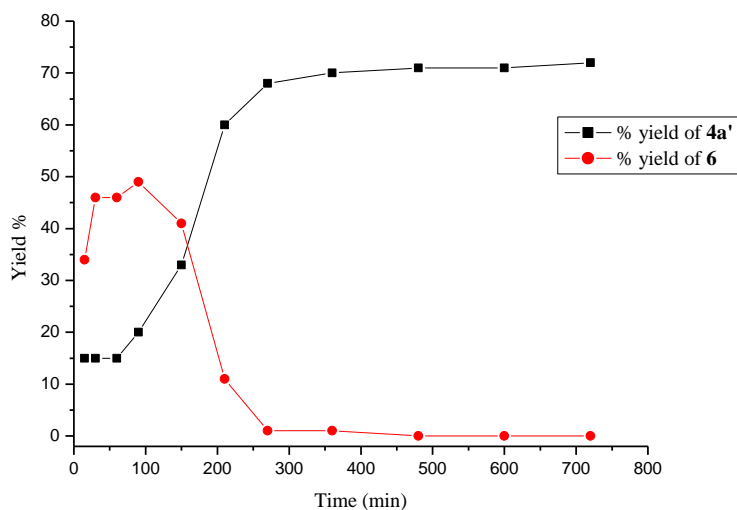

$^1\text{H}$  NMR kinetic experiments for the reaction of Meldrum's acid (300 mg, 2.08 mmol), Benzaldehyde (225  $\mu\text{L}$ , 2.19 mmol), Schiff's base **3** (799.3 mg, 2.71 mmol) and 1,3,5-trimethoxy benzene (350.1 mg, 2.08 mmol) in 8 ml ethyl acetate at room temperature (25  $^{\circ}\text{C}$ ). To quantify the kinetics of this reaction, we followed the production of **4a'** using  $^1\text{H}$  NMR spectroscopy. The aliquot sampling was taken during different time interval and the solvent (EtOAc) was evaporated and the residue was dissolved in  $\text{CDCl}_3$ .  $^1\text{H}$ -NMR of the reaction mixture was recorded at different time intervals to calculate the yield of **4a'** and to study the kinetics of the reaction. The yield of **4a'** was calculated by integrating the tert-butyl protons against trimethoxy benzene peak ( $\delta$  s, 6.09 3H) as an internal standard. Based on the time dependent  $^1\text{H}$ -NMR studies the kinetics follows the sigmoidal curve which is a characteristic of autocatalytic reaction (black line). Further, autocatalytic process was supported as the concentration of intermediate **6** followed the reverse trend as reaction progressed (red line).

## Section 2

### *trans-tert-butyl 5-oxo-3-phenylpyrrolidine-2-carboxylate (4a)*

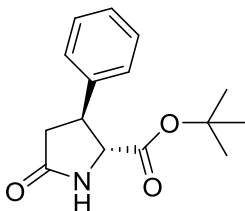

Compound **4a** was synthesized following the general procedure. Compound **4a** was obtained as white solid in 65% (235 mg, *trans/cis*; 3.6:1, 20:1 after recrystallization from DCM/n-Hexane).

M.p. 108-110 °C (reported 104-107 °C);<sup>1</sup> <sup>1</sup>H NMR (400 MHz, CDCl<sub>3</sub>) δ 7.38 – 7.34 (m, 2H), 7.30 – 7.26 (m, 3H), 6.31 (s, 1H), 4.15 (d, *J* = 6.0 Hz, 1H), 3.68 – 3.63 (m, 1H), 2.85 (dd, *J* = 17.3, 9.5 Hz, 1H), 2.54 (dd, *J* = 17.3, 7.4 Hz, 1H), 1.43 (s, 9H). <sup>13</sup>C NMR (100 MHz, CDCl<sub>3</sub>) δ 176.5, 170.3, 141.9, 129.1, 127.6, 127.2, 82.8, 63.6, 44.4, 38.4, 28.1; HRMS (ESI-TOF) *m/z*: [M + H]<sup>+</sup> calcd. for C<sub>15</sub>H<sub>20</sub>NO<sub>3</sub> 262.1443, found 262.1450. FTIR cm<sup>-1</sup> (neat) 3233, 2978, 2927, 1702, 1453, 1370, 1236, 1154, 845.

### *trans-tert-butyl 3-(4-methoxyphenyl)-5-oxopyrrolidine-2-carboxylate (4b)*

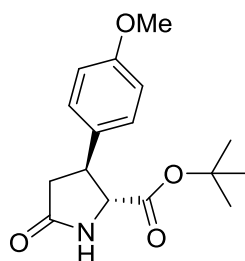

Compound **4b** was synthesized following the general procedure. Compound **4b** was obtained as colourless oil in 58% (235 mg, *trans/cis*; >20:1).

<sup>1</sup>H NMR (400 MHz, CDCl<sub>3</sub>) δ 7.20 (d, *J* = 8.7 Hz, 2H), 6.88 (d, *J* = 8.7 Hz, 2H), 6.18 (s, 1H), 4.09 (d, *J* = 6.0 Hz, 1H), 3.80 (s, 3H), 3.60 (ddd, *J* = 9.4, 7.5, 6.2 Hz, 1H), 2.81 (dd, *J* = 17.2, 9.4 Hz, 1H), 2.50 (dd, *J* = 17.2, 7.5 Hz, 1H), 1.43 (s, 9H). <sup>13</sup>C NMR (100 MHz, CDCl<sub>3</sub>) δ 176.5, 170.4, 159.0, 133.9, 128.3, 114.4, 82.8, 63.8, 55.5, 43.8, 38.5, 28.1; HRMS (ESI-

TOF)  $m/z$ :  $[M + H]^+$  calcd. for  $C_{16}H_{22}NO_4$  292.1549, found 292.1554. FTIR  $cm^{-1}$  (neat) 3234, 2976, 2925, 1698, 1614, 1513, 1456, 1369, 1294, 1243, 1153, 1033, 833.

***trans-tert-butyl 3-(3-methoxyphenyl)-5-oxopyrrolidine-2-carboxylate (4c)***

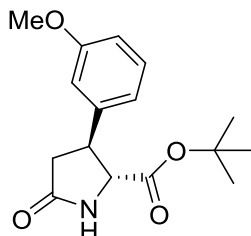

Compound **4c** was synthesized following the general procedure. Compound **4c** was obtained as colourless oil in 62% (251 mg, *trans/cis*; >20:1).

$^1H$  NMR (400 MHz,  $CDCl_3$ )  $\delta$  7.27 (dt,  $J = 7.6, 4.3$  Hz, 1H), 6.87 (d,  $J = 7.7$  Hz, 1H), 6.84 – 6.78 (m, 2H), 6.11 (s, 1H), 4.13 (d,  $J = 5.8$  Hz, 1H), 3.81 (s, 3H), 3.68 – 3.58 (m, 1H), 2.83 (dd,  $J = 17.3, 9.5$  Hz, 1H), 2.53 (dd,  $J = 17.3, 7.3$  Hz, 1H), 1.43 (s, 9H).  $^{13}C$  NMR (100 MHz,  $CDCl_3$ )  $\delta$  176.3, 170.3, 160.1, 143.6, 130.1, 119.4, 113.3, 112.6, 82.9, 63.4, 55.4, 44.3, 38.3, 28.1; HRMS (ESI-TOF)  $m/z$ :  $[M + H]^+$  calcd. for  $C_{16}H_{22}NO_4$  292.1549, found 292.1548. FTIR  $cm^{-1}$  (neat) 3234, 2924, 2853, 1704, 1601, 1489, 1457, 1369, 1245, 1157, 1046, 846.51, 782.

***trans-tert-butyl 3-(2-fluorophenyl)-5-oxopyrrolidine-2-carboxylate (4d)***

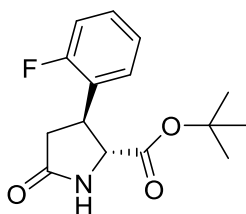

Compound **4d** was synthesized following the general procedure. Compound **4d** was obtained as colourless oil in 70% (270 mg, *trans/cis*; 5:1).

*trans* isomer-  $^1H$  NMR (400 MHz,  $CDCl_3$ )  $\delta$  7.34 – 7.20 (m, 2H), 7.19 – 7.03 (m, 2H), 6.52 (s, 1H), 4.24 (dd,  $J = 16.8, 7.7$  Hz, 1H), 3.86 (td,  $J = 8.7, 7.0$  Hz, 1H), 2.80 (ddd,  $J = 17.1, 9.5, 0.9$  Hz, 1H), 2.60 (dd,  $J = 17.1, 8.4$  Hz, 1H), 1.39 (s, 9H).  $^{13}C$  NMR (100 MHz,  $CDCl_3$ )  $\delta$  176.1, 170.1, 160.8 (d,  $J = 246.4$  Hz), 129.2 (d,  $J = 8.4$  Hz), 128.9 (d,  $J = 4.2$  Hz), 128.3 (d,  $J$

= 13.0 Hz), 124.6 (d,  $J = 3.6$  Hz), 116.0 (d,  $J = 22.0$  Hz), 82.8, 62.1, 38.5 (d,  $J = 1.8$  Hz), 37.4 (d,  $J = 1.4$  Hz), 27.9.

*cis* isomer-  $^1\text{H}$  NMR (400 MHz,  $\text{CDCl}_3$ )  $\delta$  7.27 (m, 2H), 7.18 – 6.94 (m, 2H), 6.52 (s, 1H), 4.54 (d,  $J = 8.1$  Hz, 1H), 4.23 (s, 1H), 2.71 (dd,  $J = 15.0, 8.2$  Hz, 2H), 1.05 (s, 9H).  $^{13}\text{C}$  NMR (100 MHz,  $\text{CDCl}_3$ )  $\delta$  177.2, 169.1, 161.2 (d,  $J = 247.0$  Hz), 129.4 (d,  $J = 8.4$  Hz), 129.0 (d,  $J = 4.2$  Hz), 128.2 (d,  $J = 5.9$  Hz), 124.6 (d,  $J = 3.5$  Hz), 115.3 (d,  $J = 22.3$  Hz), 82.4, 60.2, 36.1 (d,  $J = 3.8$  Hz), 34.9, 27.5.

HRMS (ESI-TOF)  $m/z$ :  $[\text{M} + \text{H}]^+$  calcd. for  $\text{C}_{15}\text{H}_{19}\text{FNO}_3$  280.1349, found 280.1355. FTIR  $\text{cm}^{-1}$  (neat) 3231, 2979, 2929, 1700, 1492, 1455, 1369.80, 1230, 1152, 844, 758.

***trans-tert-butyl 3-(3-fluorophenyl)-5-oxopyrrolidine-2-carboxylate (4e)***

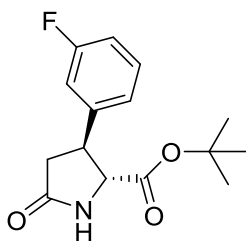

Compound **4e** was synthesized following the general procedure. Compound **4e** was obtained as colourless oil in 69% (267 mg, *trans/cis*; 5:1).

*trans* isomer-  $^1\text{H}$  NMR (400 MHz,  $\text{CDCl}_3$ )  $\delta$  7.43 – 7.25 (m, 1H), 7.13 – 7.03 (m, 1H), 7.03 – 6.84 (m, 2H), 6.48 (s, 1H), 4.12 (d,  $J = 6.0$  Hz, 1H), 3.73 – 3.57 (m, 1H), 2.93 – 2.76 (m, 1H), 2.51 (dd,  $J = 17.3, 7.4$  Hz, 1H), 1.43 (s, 9H).  $^{13}\text{C}$  NMR (100 MHz,  $\text{CDCl}_3$ )  $\delta$  176.1, 170.1, 163.1 (d,  $J = 246.8$  Hz), 144.4 (d,  $J = 7.1$  Hz), 130.6 (d,  $J = 8.4$  Hz), 122.8 (d,  $J = 2.9$  Hz), 114.5 (d,  $J = 19.4$  Hz), 114.3 (d,  $J = 20.2$  Hz), 83.0, 63.3, 44.1 (d,  $J = 1.7$  Hz), 38.3, 28.1.

*cis* isomer-  $^1\text{H}$  NMR (400 MHz,  $\text{CDCl}_3$ )  $\delta$  7.32 (td,  $J = 7.8, 6.1$  Hz, 1H), 7.07 (d,  $J = 7.7$  Hz, 1H), 7.05 – 6.91 (m, 2H), 6.48 (s, 1H), 4.49 (d,  $J = 7.9$  Hz, 1H), 3.96 – 3.85 (m, 1H), 2.79 (dd,  $J = 16.8, 8.7$  Hz, 1H), 2.65 (dd,  $J = 16.8, 5.9$  Hz, 1H), 1.09 (s, 9H);  $^{13}\text{C}$  NMR (100 MHz,  $\text{CDCl}_3$ )  $\delta$  176.9, 168.6, 162.8 (d,  $J = 246.7$  Hz), 141.7 (d,  $J = 7.2$  Hz), 130.3 (d,  $J = 8.1$  Hz), 123.5 (d,  $J = 3.0$  Hz), 115.2 (d,  $J = 21.8$  Hz), 114.7 (d,  $J = 21.0$  Hz), 82.6, 61.2, 43.0 (d,  $J = 1.7$  Hz), 36.9, 27.6.

HRMS (ESI-TOF)  $m/z$ :  $[\text{M} + \text{H}]^+$  calcd. for  $\text{C}_{15}\text{H}_{19}\text{FNO}_3$  280.1349, found 280.1357. FTIR  $\text{cm}^{-1}$  (neat) 3233, 2978, 2919, 1705, 1621, 1592, 1489, 1452, 1371, 1241, 115, 786.

***trans-tert-butyl 3-(4-chlorophenyl)-5-oxopyrrolidine-2-carboxylate (4f)***

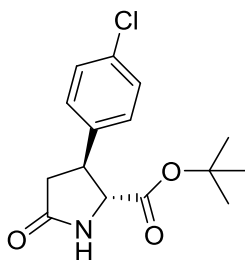

Compound **4f** was synthesized following the general procedure. Compound **4f** was obtained as colourless oil in 72% (295 mg, *trans/cis*; 4:1).

*trans* isomer-  $^1\text{H}$  NMR (400 MHz,  $\text{CDCl}_3$ )  $\delta$  7.36 – 7.29 (m, 2H), 7.25 – 7.19 (m, 2H), 6.39 (s, 1H), 4.09 (d,  $J = 6.0$  Hz, 1H), 3.68 – 3.58 (m, 1H), 2.83 (dd,  $J = 17.3, 9.4$  Hz, 1H), 2.48 (dd,  $J = 17.3, 7.5$  Hz, 1H), 1.43 (s, 9H).  $^{13}\text{C}$  NMR (100 MHz,  $\text{CDCl}_3$ )  $\delta$  176.1, 170.1, 140.4, 133.4, 129.2, 128.6, 83.1, 63.4, 43.8, 38.3, 28.1.

*cis* isomer-  $^1\text{H}$  NMR (400 MHz,  $\text{CDCl}_3$ )  $\delta$  7.28 (d,  $J = 8.5$  Hz, 2H), 7.18 (d,  $J = 8.5$  Hz, 2H), 6.39 (s, 1H), 4.49 (d,  $J = 7.9$  Hz, 1H), 3.88 (td,  $J = 8.3, 5.6$  Hz, 1H), 2.79 (dd,  $J = 15.8, 9.1$  Hz, 1H), 2.61 (dd,  $J = 16.8, 5.5$  Hz, 1H), 1.08 (s, 9H).  $^{13}\text{C}$  NMR (100 MHz,  $\text{CDCl}_3$ )  $\delta$  177.0, 168.7, 137.8, 133.6, 129.3, 128.8, 82.7, 61.2, 42.6, 37.1, 27.6.

HRMS (ESI-TOF)  $m/z$ :  $[\text{M} + \text{H}]^+$  calcd. for  $\text{C}_{15}\text{H}_{19}\text{ClNO}_3$  296.1053, found 296.1058. FTIR  $\text{cm}^{-1}$  (neat) 3229, 2978, 2927, 1700, 1492, 1369, 1235, 1154, 1093, 1014, 832, 730.

***trans-tert-butyl 3-(2-bromophenyl)-5-oxopyrrolidine-2-carboxylate (4g)***

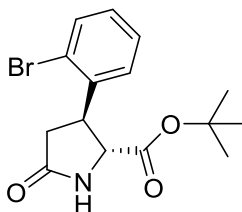

Compound **4g** was synthesized following the general procedure. Compound **4g** was obtained as colourless oil in 59% (235 mg, *trans/cis*; 2.5:1).

*trans* isomer-  $^1\text{H}$  NMR (400 MHz,  $\text{CDCl}_3$ )  $\delta$  7.65 – 7.46 (m, 1H), 7.35 – 7.28 (m, 2H), 7.20 – 7.08 (m, 1H), 6.31 (s, 1H), 4.27 – 4.06 (m, 1H), 2.88 (ddd,  $J = 10.8, 9.5, 6.2$  Hz, 1H), 2.72

(qd,  $J = 16.7, 8.3$  Hz, 1H), 2.53 – 2.38 (m, 1H), 1.43 (s, 9H).  $^{13}\text{C}$  NMR (100 MHz,  $\text{CDCl}_3$ )  $\delta$  176.3, 170.2, 140.9, 133.4, 129.0, 128.3, 128.0, 124.2, 82.9, 62.3, 43.1, 37.6, 28.0.

*cis* isomer-  $^1\text{H}$  NMR (400 MHz,  $\text{CDCl}_3$ )  $\delta$  7.58 (dd,  $J = 7.9, 1.1$  Hz, 1H), 7.32 – 7.29 (m, 2H), 7.18 – 7.11 (m, 1H), 6.28 (s, 1H), 4.68 (dd,  $J = 8.3, 0.7$  Hz, 1H), 4.43 (q,  $J = 8.3$  Hz, 1H), 2.94 – 2.83 (m, 1H), 2.42 (dd,  $J = 4.8, 1.9$  Hz, 1H), 1.05 (s, 9H);  $^{13}\text{C}$  NMR (100 MHz,  $\text{CDCl}_3$ )  $\delta$  177.0, 169.1, 138.0, 133.1, 129.3, 128.2, 128.1, 125.8, 82.5, 59.5, 42.3, 35.6, 27.6.

HRMS (ESI-TOF)  $m/z$ :  $[\text{M} + \text{H}]^+$  calcd. for  $\text{C}_{15}\text{H}_{19}\text{BrNO}_3$  340.0548, found 340.0538. FTIR  $\text{cm}^{-1}$  (neat) 3233, 2977, 2928, 1699, 1471, 1437, 1369, 1233, 1153, 1024, 845, 754, 663.

***trans-tert-butyl 3-(4-cyanophenyl)-5-oxopyrrolidine-2-carboxylate (4h)***

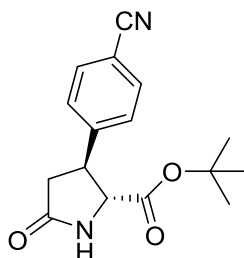

Compound **4h** was synthesized following the general procedure. Compound **4h** was obtained as colourless oil in 68% (270 mg, *trans/cis*; >20:1).

$^1\text{H}$  NMR (400 MHz,  $\text{CDCl}_3$ )  $\delta$  7.68 – 7.66 (m, 2H), 7.44 – 7.32 (m, 2H), 7.03 (s, 1H), 4.14 (d,  $J = 6.0$  Hz, 1H), 3.75 – 3.69 (m, 1H), 2.88 (dd,  $J = 17.3, 9.5$  Hz, 1H), 2.51 (dd,  $J = 17.3, 7.4$  Hz, 1H), 1.43 (s, 9H).  $^{13}\text{C}$  NMR (100 MHz,  $\text{CDCl}_3$ )  $\delta$  175.9, 169.7, 147.2, 132.8, 128.1, 118.5, 111.5, 83.2, 63.1, 44.2, 38.1, 28.0; HRMS (ESI-TOF)  $m/z$ :  $[\text{M} + \text{H}]^+$  calcd. for  $\text{C}_{16}\text{H}_{19}\text{N}_2\text{O}_3$  287.1395, found 287.1402. FTIR  $\text{cm}^{-1}$  (neat) 3233, 2924, 2855, 2229, 1697, 1611, 1457, 1421, 1370, 1237, 1153, 972, 839, 784.

***trans-tert-butyl 5-oxo-3-(4-(trifluoromethyl)phenyl)pyrrolidine-2-carboxylate (4i)***

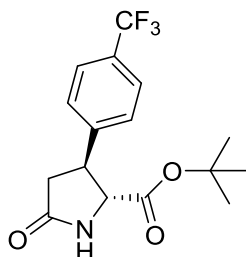



Compound **4i** was synthesized following the general procedure. Compound **4i** was obtained as colourless oil in 71% (324 mg, *trans/cis*; >20:1).

$^1\text{H}$  NMR (400 MHz,  $\text{CDCl}_3$ )  $\delta$  7.63 (d,  $J = 8.1$  Hz, 2H), 7.42 (d,  $J = 8.2$  Hz, 2H), 6.10 (s, 1H), 4.14 (d,  $J = 6.0$  Hz, 1H), 3.87 – 3.59 (m, 1H), 2.87 (dd,  $J = 17.3, 9.5$  Hz, 1H), 2.53 (dd,  $J = 17.3, 7.4$  Hz, 1H), 1.43 (s, 9H).  $^{13}\text{C}$  NMR (100 MHz,  $\text{CDCl}_3$ )  $\delta$  175.5, 169.7, 145.7, 129.9 (q,  $J = 37$  Hz), 127.5, 126.7 (q,  $J = 267$  Hz), 126.0 (q,  $J = 3.7$  Hz), 83.1, 62.9, 43.9, 38.0, 27.9; HRMS (ESI-TOF)  $m/z$ :  $[\text{M} + \text{H}]^+$  calcd. for  $\text{C}_{16}\text{H}_{19}\text{F}_3\text{NO}_3$  330.1317, found 330.1328. FTIR  $\text{cm}^{-1}$  (neat) 3232, 2979, 2925, 1706, 1623, 1424, 1371, 1327, 1240, 1160, 1122, 1069, 842.

***trans-tert-butyl 3-(2-nitrophenyl)-5-oxopyrrolidine-2-carboxylate (4j)***

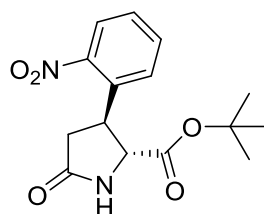

Compound **4j** was synthesized following the general procedure. Compound **4j** was obtained as colourless oil in 61% (259 mg, *trans/cis*; 3:1).

*trans* isomer-  $^1\text{H}$  NMR (400 MHz,  $\text{CDCl}_3$ )  $\delta$  7.87 (dd,  $J = 8.2, 1.3$  Hz, 1H), 7.67 – 7.61 (m, 1H), 7.55 – 7.51 (m, 1H), 7.47 – 7.42 (m, 1H), 6.64 (s, 1H), 4.22 (m, 2H), 3.01 (dt,  $J = 18.0, 8.9$  Hz, 1H), 2.56 – 2.39 (m, 1H), 1.40 (s, 9H).  $^{13}\text{C}$  NMR (100 MHz,  $\text{CDCl}_3$ )  $\delta$  176.2, 169.8, 149.6, 136.7, 133.7, 128.4, 128.3, 124.8, 83.3, 62.9, 38.5, 38.2, 27.9.

*cis* isomer-  $^1\text{H}$  NMR (400 MHz,  $\text{CDCl}_3$ )  $\delta$  7.91 (dd,  $J = 8.2, 1.4$  Hz, 1H), 7.82 – 7.78 (m, 1H), 7.61 – 7.56 (m, 1H), 7.49 – 7.34 (m, 1H), 6.57 (s, 1H), 4.66 – 4.57 (m, 2H), 3.26 – 3.16 (m, 1H), 2.81 – 2.74 (m, 1H), 1.02 (s, 9H).  $^{13}\text{C}$  NMR (100 MHz,  $\text{CDCl}_3$ )  $\delta$  176.5, 168.9, 150.1, 133.6, 130.2, 128.7, 128.6, 124.9, 82.9, 60.0, 37.8, 36.4, 27.5.

HRMS (ESI-TOF)  $m/z$ :  $[\text{M} + \text{H}]^+$  calcd. for  $\text{C}_{15}\text{H}_{19}\text{N}_2\text{O}_5$  307.1294, found 307.1300. FTIR  $\text{cm}^{-1}$  (neat) 3232, 2923, 2854, 1697, 1453, 1369, 1234, 1151, 1044, 967, 843.

***trans-tert-butyl 3-(3-nitrophenyl)-5-oxopyrrolidine-2-carboxylate (4k)***

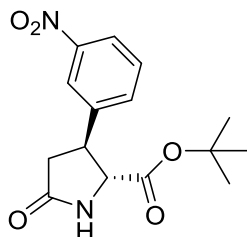

Compound **4k** was synthesized following the general procedure. Compound **4k** was obtained as colourless oil in 65% (276 mg, *trans/cis*; 9:1).

*trans* isomer-  $^1\text{H}$  NMR (400 MHz,  $\text{CDCl}_3$ )  $\delta$  8.27 – 8.07 (m, 2H), 7.68 – 7.62 (m, 1H), 7.59 – 7.50 (m, 1H), 6.57 (s, 1H), 4.18 (d,  $J = 6.4$  Hz, 1H), 3.79 (ddd,  $J = 9.4, 7.9, 6.4$  Hz, 1H), 2.90 (dd,  $J = 17.3, 9.5$  Hz, 1H), 2.56 (dd,  $J = 17.3, 7.9$  Hz, 1H), 1.42 (s, 9H).  $^{13}\text{C}$  NMR (100 MHz,  $\text{CDCl}_3$ )  $\delta$  175.5, 169.6, 148.6, 143.7, 133.4, 130.2, 122.7, 122.6, 83.5, 63.1, 43.9, 38.2, 28.0.

*cis* isomer-  $^1\text{H}$  NMR (400 MHz,  $\text{CDCl}_3$ )  $\delta$  8.16 – 8.08 (m, 2H), 7.69 – 7.49 (m, 2H), 6.57 (s, 1H), 4.57 (d,  $J = 7.8$  Hz, 1H), 4.08 – 3.97 (m, 1H), 2.87 (dd,  $J = 16.8, 8.7$  Hz, 1H), 2.67 (dd,  $J = 16.9, 5.5$  Hz, 1H), 1.05 (s, 9H).  $^{13}\text{C}$  NMR (100 MHz,  $\text{CDCl}_3$ )  $\delta$  133.6, 130.0, 83.0, 27.6 other peaks were not visible.

HRMS (ESI-TOF)  $m/z$ :  $[\text{M} + \text{H}]^+$  calcd. for  $\text{C}_{15}\text{H}_{19}\text{N}_2\text{O}_5$  307.1294, found 307.1298. FTIR  $\text{cm}^{-1}$  (neat) 3233, 2977, 2925, 1702, 1529, 1451, 1348, 1236, 1154, 812, 737.

***trans-tert-butyl 3-(4-nitrophenyl)-5-oxopyrrolidine-2-carboxylate (4l)***

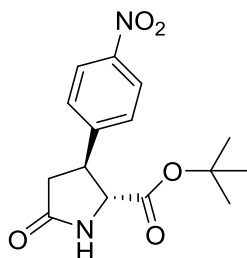

Compound **4l** was synthesized following the general procedure. Compound **4l** was obtained as colourless oil in 56% (238 mg, *trans/cis*; >20:1).

$^1\text{H}$  NMR (400 MHz,  $\text{CDCl}_3$ )  $\delta$  8.23 (d,  $J = 8.8$  Hz, 2H), 7.48 (d,  $J = 8.7$  Hz, 2H), 6.55 (s, 1H), 4.15 (d,  $J = 6.1$  Hz, 1H), 3.94 – 3.60 (m, 1H), 2.89 (dd,  $J = 17.3, 9.5$  Hz, 1H), 2.53 (dd,  $J =$

17.3, 7.5 Hz, 1H), 1.43 (s, 9H).  $^{13}\text{C}$  NMR (100 MHz,  $\text{CDCl}_3$ )  $\delta$  175.5, 169.6, 149.1, 147.4, 128.3, 124.4, 83.5, 62.9, 44.0, 38.2, 28.1; HRMS (ESI-TOF)  $m/z$ :  $[\text{M} + \text{H}]^+$  calcd. for  $\text{C}_{15}\text{H}_{19}\text{N}_2\text{O}_5$  307.1294, found 307.1300. FTIR  $\text{cm}^{-1}$  (neat) 3234, 2978, 2925, 1702, 1602, 1520, 1454, 1346, 1238, 1155, 1113, 852, 754.

***trans-tert-butyl 3-(3,5-dimethoxyphenyl)-5-oxopyrrolidine-2-carboxylate (4m)***

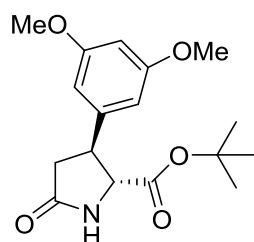

Compound **4m** was synthesized following the general procedure. Compound **4m** was obtained as colourless oil in 68% (303 mg, *trans/cis*; >20:1).

$^1\text{H}$  NMR (400 MHz,  $\text{CDCl}_3$ )  $\delta$  6.42 (d,  $J = 2.2$  Hz, 2H), 6.38 – 6.36 (m, 1H), 6.32 (s, 1H), 4.13 (d,  $J = 5.7$  Hz, 1H), 3.79 (s, 6H), 3.65 – 3.51 (m, 1H), 2.82 (dd,  $J = 17.4, 9.6$  Hz, 1H), 2.51 (dd,  $J = 17.4, 7.1$  Hz, 1H), 1.44 (s, 9H).  $^{13}\text{C}$  NMR (100 MHz,  $\text{CDCl}_3$ )  $\delta$  176.5, 170.3, 161.3, 144.5, 105.3, 99.1, 82.8, 63.4, 55.5, 44.4, 38.2, 28.1; HRMS (ESI-TOF)  $m/z$ :  $[\text{M} + \text{H}]^+$  calcd. for  $\text{C}_{17}\text{H}_{24}\text{NO}_5$  322.1654, found 322.1657. FTIR  $\text{cm}^{-1}$  (neat) 3227, 2925, 2851, 1701, 1598, 1462, 1365, 1295, 1237, 1202, 1151, 1064, 968, 926, 840.

***trans-tert-butyl 3-(benzo[d][1,3]dioxol-5-yl)-5-oxopyrrolidine-2-carboxylate (4n)***

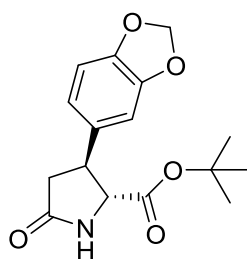

Compound **4n** was synthesized following the general procedure. Compound **4n** was obtained as colourless oil in 55% (233 mg, *trans/cis*; 5:1).

*trans* isomer-  $^1\text{H}$  NMR (400 MHz,  $\text{CDCl}_3$ )  $\delta$  6.79 – 6.75 (m, 2H), 6.74 – 6.69 (m, 1H), 6.22 (s, 1H), 5.96 (s, 2H), 4.07 (d,  $J = 6.0$  Hz, 1H), 3.57 (ddd,  $J = 9.4, 7.4, 6.0$  Hz, 1H), 2.89 – 2.73 (m, 1H), 2.47 (dd,  $J = 17.3, 7.4$  Hz, 1H), 1.43 (s, 9H).  $^{13}\text{C}$  NMR (100 MHz,  $\text{CDCl}_3$ )  $\delta$  176.3, 170.3, 148.2, 147.0, 135.7, 120.6, 108.6, 107.3, 101.3, 82.9, 63.7, 44.2, 38.5, 28.1.

*cis* isomer-  $^1\text{H}$  NMR (400 MHz,  $\text{CDCl}_3$ )  $\delta$  6.77 (dd,  $J = 4.7, 3.0$  Hz, 1H), 6.74 – 6.68 (m, 1H), 6.22 (s, 1H), 5.96 (s, 1H), 4.48 – 4.41 (m, 1H), 3.90 – 3.76 (m, 1H), 2.76 (dd,  $J = 16.8, 8.7$  Hz, 1H), 2.61 (dd,  $J = 16.8, 5.9$  Hz, 1H), 1.14 (s, 9H).  $^{13}\text{C}$  NMR (100 MHz,  $\text{CDCl}_3$ )  $\delta$  177.2, 169.9, 147.9, 146.6, 136.6, 121.2, 108.5, 108.3, 101.2, 82.4, 61.4, 43.1, 37.2, 27.7.

HRMS (ESI-TOF)  $m/z$ :  $[\text{M} + \text{H}]^+$  calcd. for  $\text{C}_{16}\text{H}_{20}\text{NO}_5$  306.1341, found 306.1348. FTIR  $\text{cm}^{-1}$  (neat) 3232, 2976, 2924, 1697, 1492, 1445, 1369, 1237, 1152, 1036, 931, 847, 812, 732.

***trans-tert-butyl 3-(naphthalen-1-yl)-5-oxopyrrolidine-2-carboxylate (4o)***

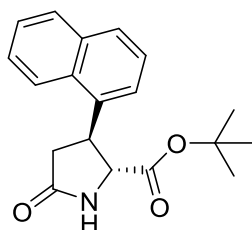

Compound **4o** was synthesized following the general procedure. Compound **4o** was obtained as colourless oil in 65% (281 mg, *trans/cis*; 3:1).

*trans* isomer-  $^1\text{H}$  NMR (400 MHz,  $\text{CDCl}_3$ )  $\delta$  8.16 (d,  $J = 8.3$  Hz, 1H), 7.90 (dd,  $J = 6.6, 5.4$  Hz, 1H), 7.84 – 7.76 (m, 1H), 7.65 – 7.38 (m, 4H), 6.80 (s, 1H), 4.56 – 4.41 (m, 1H), 4.26 (d,  $J = 3.8$  Hz, 1H), 3.06 – 2.94 (m, 1H), 2.73 – 2.61 (m, 1H), 1.45 (s, 9H).  $^{13}\text{C}$  NMR (100 MHz,  $\text{CDCl}_3$ )  $\delta$  177.5, 170.8, 137.8, 134.2, 131.0, 129.4, 128.4, 128.2, 126.6, 126.0, 125.6, 122.9, 82.9, 63.1, 38.8, 37.2, 28.0.

*cis* isomer-  $^1\text{H}$  NMR (400 MHz,  $\text{CDCl}_3$ )  $\delta$  8.11 (d,  $J = 8.5$  Hz, 1H), 7.87 (d,  $J = 8.2$  Hz, 1H), 7.83 – 7.75 (m, 1H), 7.63 – 7.35 (m, 4H), 6.86 (s, 1H), 4.84 – 4.67 (m, 2H), 3.05 (dd,  $J = 16.7, 8.2$  Hz, 1H), 2.76 (dd,  $J = 16.6, 8.1$  Hz, 1H), 0.66 (s, 9H).  $^{13}\text{C}$  NMR (100 MHz,  $\text{CDCl}_3$ )  $\delta$  177.9, 169.2, 137.7, 133.8, 132.3, 129.1, 129.0, 128.4, 126.5, 125.9, 124.2, 123.4, 81.8, 60.7, 39.5, 35.3, 27.1.

HRMS (ESI-TOF)  $m/z$ :  $[\text{M} + \text{H}]^+$  calcd. for  $\text{C}_{19}\text{H}_{22}\text{NO}_3$  312.1599, found 312.1608. FTIR  $\text{cm}^{-1}$  (neat) 3223, 2976, 2926, 1700, 1425, 1369, 1237, 1151, 967, 84, 780.

***trans-tert-butyl 3-(naphthalen-2-yl)-5-oxopyrrolidine-2-carboxylate (4p)***

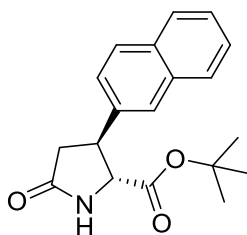

Compound **4p** was synthesized following the general procedure. Compound **4p** was obtained as colourless oil in 60% (259 mg, *trans/cis*; >20:1).

$^1\text{H}$  NMR (400 MHz,  $\text{CDCl}_3$ )  $\delta$  8.46 (s, 1H), 8.07 (d,  $J = 8.2$  Hz, 2H), 7.53 (m, 4H), 6.42 (s, 1H), 5.29 (ddd,  $J = 11.4, 9.0, 7.5$  Hz, 1H), 4.81 (d,  $J = 7.3$  Hz, 1H), 3.16 (dd,  $J = 18.0, 9.1$  Hz, 1H), 3.04 (dd,  $J = 18.0, 11.4$  Hz, 1H), 1.20 (s, 9H).  $^{13}\text{C}$  NMR (100 MHz,  $\text{CDCl}_3$ )  $\delta$  176.3, 171.0, 147.2, 132.2, 131.9, 128.4, 126.6, 125.0, 123.6, 82.9, 62.2, 38.2, 36.4, 27.8; HRMS (ESI-TOF)  $m/z$ :  $[\text{M} + \text{H}]^+$  calcd. for  $\text{C}_{19}\text{H}_{22}\text{NO}_3$  312.1599, found 312.1608. FTIR  $\text{cm}^{-1}$  (neat) 3209, 2975, 2924, 2855, 1696, 1452, 1369, 1238, 1153, 887, 842.

***trans-tert-butyl 3-(furan-2-yl)-5-oxopyrrolidine-2-carboxylate (4q)***

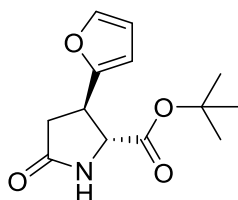

Compound **4q** was synthesized following the general procedure. Compound **4q** was obtained as colourless oil in 52% (181 mg, *trans/cis*; >20:1).

$^1\text{H}$  NMR (400 MHz,  $\text{CDCl}_3$ )  $\delta$  7.37 (dd,  $J = 1.8, 0.8$  Hz, 1H), 6.33 (dd,  $J = 3.2, 1.9$  Hz, 1H), 6.19 (d,  $J = 3.2$  Hz, 1H), 5.93 (s, 1H), 4.23 (d,  $J = 6.4$  Hz, 1H), 3.86 – 3.71 (m, 1H), 2.74 (dd,  $J = 17.0, 9.2$  Hz, 1H), 2.64 (dd,  $J = 17.0, 7.9$  Hz, 1H), 1.46 (s, 9H).  $^{13}\text{C}$  NMR (100 MHz,  $\text{CDCl}_3$ )  $\delta$  175.5, 169.9, 153.4, 142.3, 110.5, 106.6, 83.1, 60.7, 37.9, 35.4, 28.1; HRMS (ESI-TOF)  $m/z$ :  $[\text{M} + \text{Na}]^+$  calcd. for  $\text{C}_{13}\text{H}_{17}\text{NO}_4 \text{Na}$  274.1055, found 274.1057. FTIR  $\text{cm}^{-1}$  (neat) 3295, 2976, 2927, 1694, 1370, 1241, 1153, 1017, 971, 840.

***trans-tert-butyl 5-oxo-3-(thiophen-2-yl)pyrrolidine-2-carboxylate (4r)***

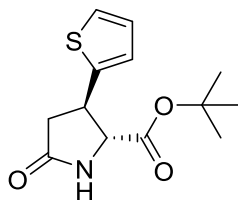

Compound **4r** was synthesized following the general procedure. Compound **4r** was obtained as colourless oil in 58% (215 mg, *trans/cis*; >20:1).

$^1\text{H}$  NMR (400 MHz,  $\text{CDCl}_3$ )  $\delta$  7.26 (s, 1H), 7.22 (dd,  $J = 3.8, 2.5$  Hz, 1H), 6.98 – 6.95 (m, 1H), 6.06 (s, 1H), 4.17 (d,  $J = 6.1$  Hz, 1H), 3.98 (ddd,  $J = 9.1, 7.8, 6.2$  Hz, 1H), 2.89 (dd,  $J = 17.1, 9.2$  Hz, 1H), 2.60 (dd,  $J = 17.1, 7.7$  Hz, 1H), 1.47 (s, 9H).  $^{13}\text{C}$  NMR (100 MHz,  $\text{CDCl}_3$ )  $\delta$  175.4, 169.8, 144.7, 127.1, 124.9, 124.5, 83.2, 63.8, 39.7, 39.1, 28.1; HRMS (ESI-TOF)  $m/z$ :  $[\text{M} + \text{Na}]^+$  calcd. for  $\text{C}_{13}\text{H}_{17}\text{NO}_3\text{SNa}$  290.0826, found 290.0831. FTIR  $\text{cm}^{-1}$  (neat) 3227, 2924, 2856, 1704, 1453, 1369, 1240, 1154, 844, 780.

***trans-tert-butyl 3-ethyl-5-oxopyrrolidine-2-carboxylate (4s)***

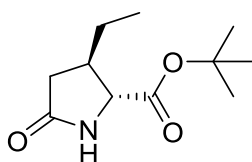

Compound **4s** was synthesized following the general procedure. Compound **4s** was obtained as colourless oil in 35% (104 mg, *trans/cis*; 2:1).

*trans* isomer-  $^1\text{H}$  NMR (400 MHz,  $\text{CDCl}_3$ )  $\delta$  6.05 (s, 1H), 4.09 (d,  $J = 8.2$  Hz, 1H), 2.59 – 2.47 (m, 1H), 2.42 – 2.33 (m, 1H), 2.21 – 2.11 (m, 1H), 1.63 – 1.52 (m, 1H), 1.46 (s, 9H), 1.33 (m, 1H), 0.95 (t,  $J = 7.4$ , 3H).  $^{13}\text{C}$  NMR (100 MHz,  $\text{CDCl}_3$ )  $\delta$  178.4, 170.4, 82.7, 60.2, 40.6, 35.0, 28.2, 23.4, 12.4.

*cis* isomer-  $^1\text{H}$  NMR (400 MHz,  $\text{CDCl}_3$ )  $\delta$  6.07 (s, 1H), 3.76 (d,  $J = 5.5$  Hz, 1H), 2.61 – 2.47 (m, 1H), 2.37 (dd,  $J = 16.5, 8.2$  Hz, 1H), 2.10 – 1.96 (m, 1H), 1.82 – 1.69 (m, 1H), 1.46 (s, 9H), 1.33 (ddd,  $J = 13.4, 9.2, 6.6$  Hz, 1H), 0.95 (t,  $J = 7.4$  Hz, 3H).  $^{13}\text{C}$  NMR (100 MHz,  $\text{CDCl}_3$ )  $\delta$  177.3, 171.1, 82.5, 61.4, 40.7, 35.8, 29.8, 28.1, 11.7.

HRMS (ESI-TOF)  $m/z$ :  $[M + Na]^+$  calcd. for  $C_{11}H_{19}NO_3Na$  236.1262, found 236.1264. FTIR  $cm^{-1}$  (neat) 3236, 2967, 2926, 1698, 1457, 1422, 1369, 1227, 1154, 844.

***trans-tert-butyl 3-isobutyl-5-oxopyrrolidine-2-carboxylate (4t)***

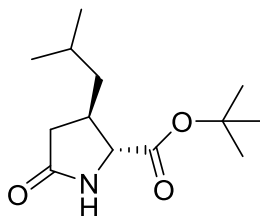

Compound **4t** was synthesized following the general procedure. Compound **4t** was obtained as colourless oil in 41% (137 mg, *trans/cis*; 1.3:1).

*trans* isomer-  $^1H$  NMR (400 MHz,  $CDCl_3$ )  $\delta$  6.86 (s, 1H), 4.01 (d,  $J = 7.9$  Hz, 1H), 2.55 – 2.39 (m, 1H), 2.34 – 2.22 (m, 1H), 2.19 – 2.05 (m, 1H), 1.65 – 1.49 (m, 1H), 1.46 – 1.36 (m, 9H), 1.33 – 1.15 (m, 2H), 0.92 – 0.77 (m, 6H).  $^{13}C$  NMR (100 MHz,  $CDCl_3$ )  $\delta$  178.8, 170.5, 82.4, 60.4, 39.3, 36.6, 28.1, 26.0, 23.3, 21.8.

*cis* isomer-  $^1H$  NMR (400 MHz,  $CDCl_3$ )  $\delta$  6.89 (s, 1H), 3.69 (d,  $J = 5.4$  Hz, 1H), 2.54 – 2.39 (m, 1H), 2.28 (ddt,  $J = 16.4, 8.1, 1.4$  Hz, 1H), 2.10 (m, 1H), 2.01 – 1.89 (m, 1H), 1.41 (s, 9H), 1.33 – 1.18 (m, 2H), 0.92 – 0.78 (m, 6H).  $^{13}C$  NMR (100 MHz,  $CDCl_3$ )  $\delta$  177.6, 171.1, 82.2, 61.9, 44.5, 37.1, 35.4, 28.0, 23.0, 22.0.

HRMS (ESI-TOF)  $m/z$ :  $[M + H]^+$  calcd. for  $C_{13}H_{24}NO_3$  242.1756, found 242.1763. FTIR  $cm^{-1}$  (neat) 3233, 2958, 1698, 1460, 1423, 1368, 1292, 1225, 1152, 844.

***trans-benzyl 5-oxo-3-phenylpyrrolidine-2-carboxylate (4u)***

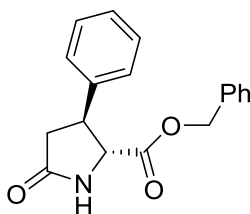

Compound **4u** was synthesized following the general procedure using **3b** as Schiff's base. Compound **4u** was obtained as colourless oil in 56% (229 mg, *trans/cis*; 10:1).

$^1\text{H}$  NMR (400 MHz,  $\text{CDCl}_3$ )  $\delta$  7.37 – 7.21 (m, 10H), 6.78 (s, 1H), 5.23 (d,  $J = 12.2$  Hz, 1H), 5.13 (d,  $J = 12.2$  Hz, 1H), 4.29 (d,  $J = 5.5$  Hz, 1H), 3.67 (ddd,  $J = 9.5, 6.8, 5.6$  Hz, 1H), 2.85 (dd,  $J = 17.4, 9.5$  Hz, 1H), 2.53 (dd,  $J = 17.4, 6.9$  Hz, 1H).  $^{13}\text{C}$  NMR (100 MHz,  $\text{CDCl}_3$ )  $\delta$  177.1, 171.1, 141.6, 135.1, 129.2, 128.8, 128.7, 128.5, 127.7, 127.1, 67.5, 63.1, 44.1, 38.1; HRMS (ESI-TOF)  $m/z$ :  $[\text{M} + \text{H}]^+$  calcd. for  $\text{C}_{18}\text{H}_{18}\text{NO}_3$  296.1281, found 296.1287.

### Application of the protocol

#### *trans*-5-oxo-3-phenylpyrrolidine-2-carboxylic acid

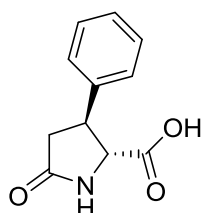

To the stirred solution of product **4u** (200 mg) in methanol, 10% Pd/C was added at room temperature. The resulting mixture was stirred for 12 hours under  $\text{H}_2$  (1 atm, balloon) and then filtered through celite bed and concentrated under reduced pressure on rotatory evaporator. Further, the crude product **8** was purified by column chromatography on silica gel using dichloromethane/methanol (90:10) as an eluent. The acid **8** obtained as a white solid in 75% (139 mg) yield with 10:1 *dr* ratio.

M.p. 141-143  $^\circ\text{C}$  (reported 166.5-167.0  $^\circ\text{C}$ );<sup>2</sup>  $^1\text{H}$  NMR (400 MHz,  $\text{CD}_3\text{OD}$ )  $\delta$  7.38 – 7.24 (m, 5H), 4.22 (d,  $J = 4.9$  Hz, 1H), 3.73 – 3.66 (m, 1H), 2.85 (dd,  $J = 17.2, 9.4$  Hz, 1H), 2.43 (dd,  $J = 17.2, 6.0$  Hz, 1H).  $^{13}\text{C}$  NMR (100 MHz,  $\text{CD}_3\text{OD}$ )  $\delta$  179.7, 175.0, 143.9, 123.0, 128.4, 127.9, 64.6, 45.5, 39.2; HRMS (ESI-TOF)  $m/z$ :  $[\text{M} + \text{H}]^+$  calcd. for  $\text{C}_{11}\text{H}_{12}\text{NO}_3$  206.0812, found 206.0808.



### Gram Scale Synthesis of compound **4a**

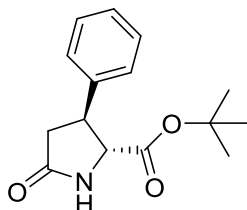

For the gram scale synthesis general procedure described in the manuscript was followed on a higher scale. Meldrum's acid **1** (1 g, 6.95 mmol, 1 equiv.), benzaldehyde **2a** (750  $\mu$ L, 7.35 mmol, 1.06 equiv.) and Schiff's base **3a** (3.07 g, 10.25 mmol, 1.5 equiv.) in 15 mL of EtOAc. Workup was performed according to general procedure described in the manuscript. Product **4a** obtained as white solid in 55% yield (0.99 g).

### Gram Scale Synthesis of compound **4h**

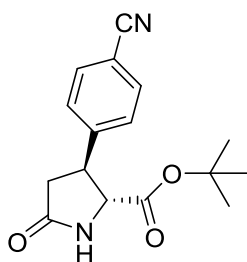

For the gram scale synthesis general procedure described in the manuscript was followed on a higher scale. Meldrum's acid **1** (1 g, 6.95 mmol, 1 equiv.), 4-cyanobenzaldehyde **2h** (955.4 mg, 7.35 mmol, 1.05 equiv.) and Schiff's base **3a** (3.07 g, 10.25 mmol, 1.5 equiv.) in 15 mL of EtOAc. Workup was performed according to general procedure described in the manuscript. Product **4h** obtained as colourless viscous liquid in 59% yield (1.17 g).

Section 3:  $^1\text{H}$  and  $^{13}\text{C}$  Spectra of compounds 4a-4u, 8

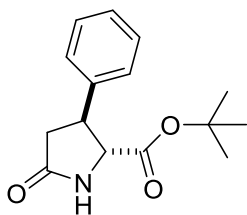

**4a**

*trans/cis* 20:1

*trans+cis* mixture

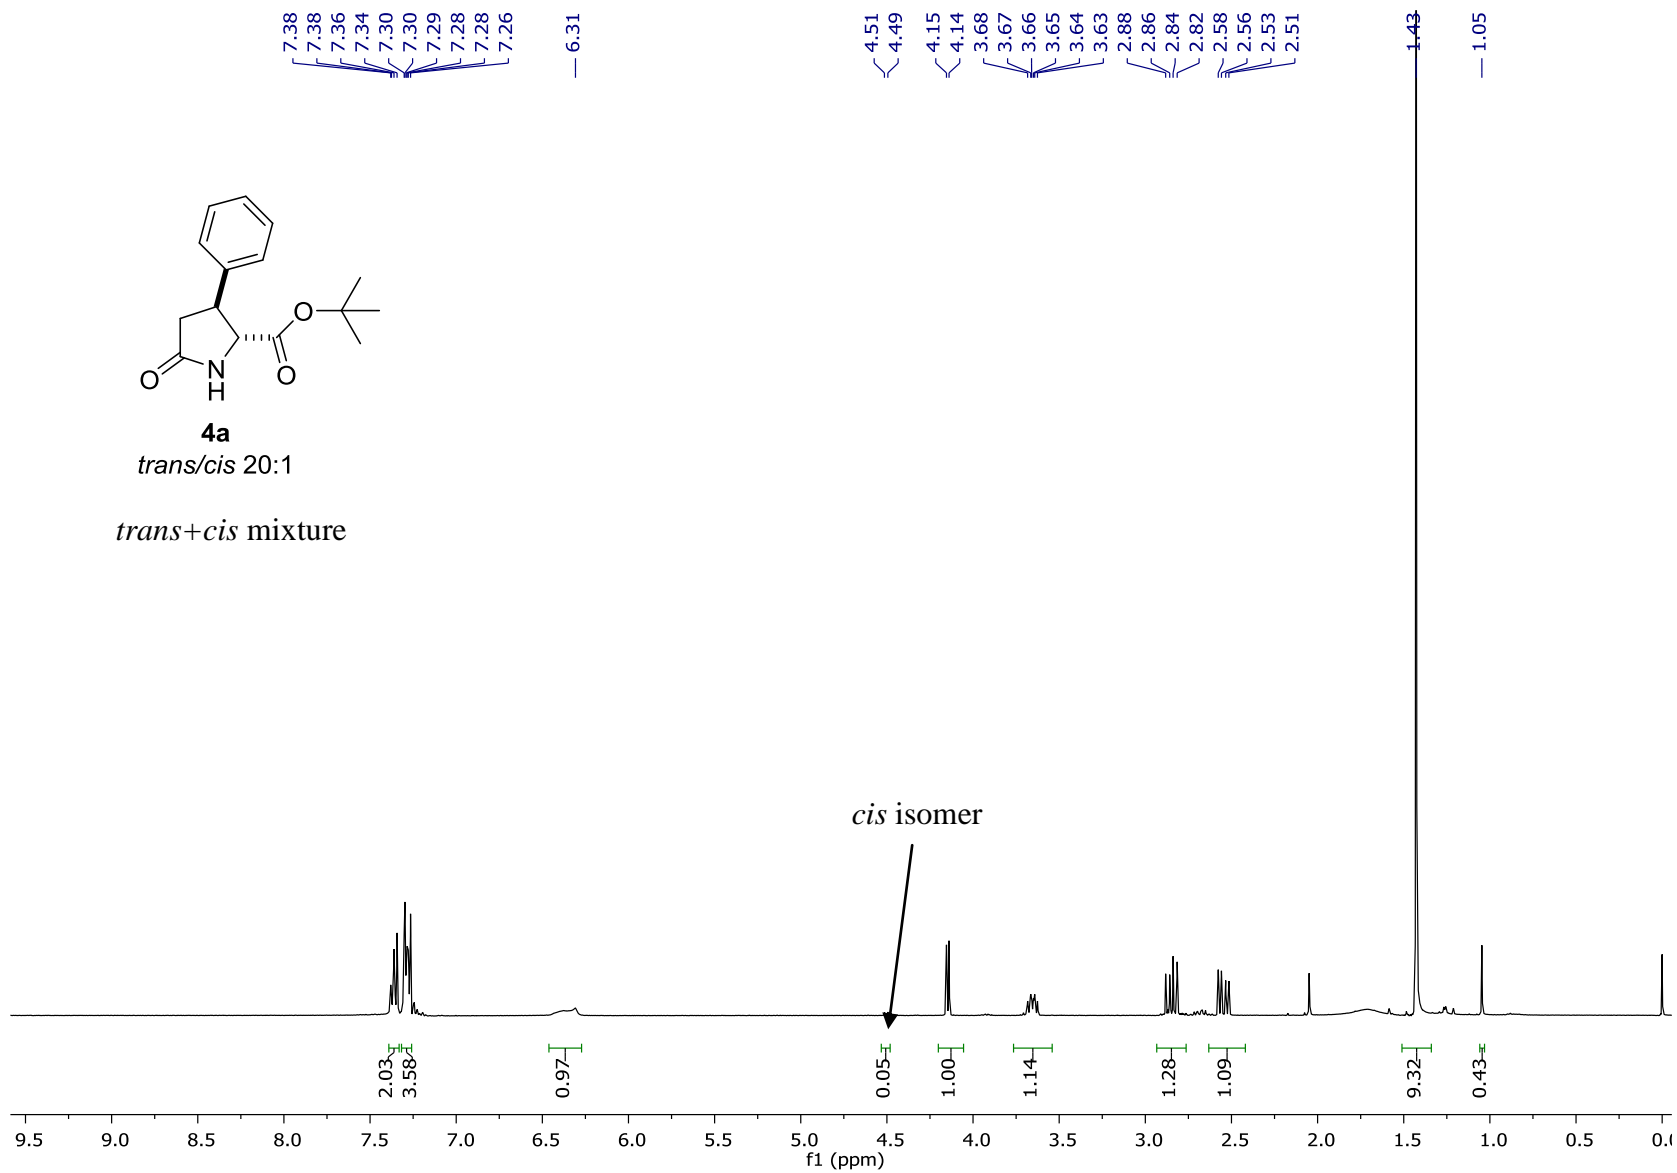

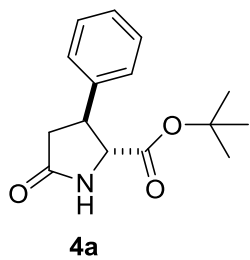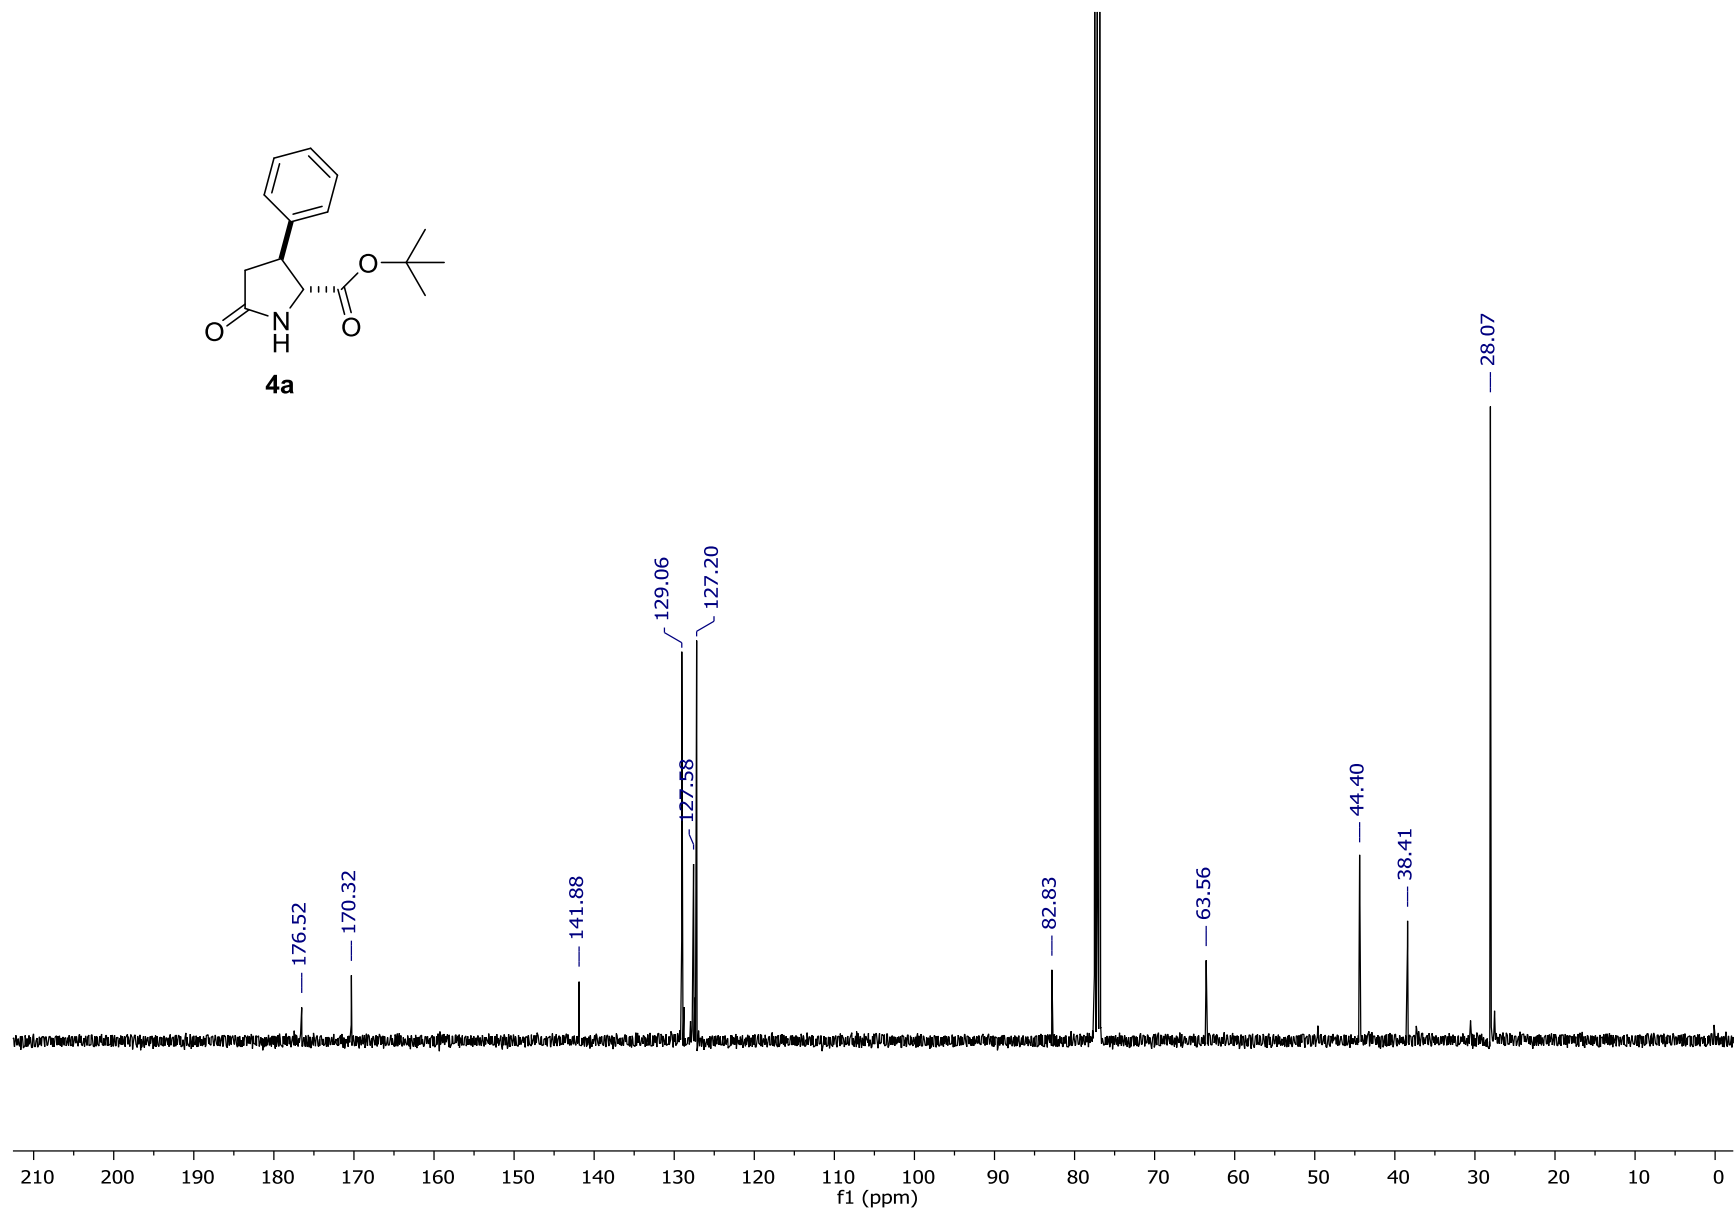

20160830-ADS-155-RGB

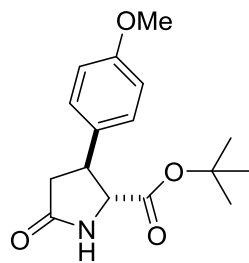

**4b**  
*trans/cis* >20:1

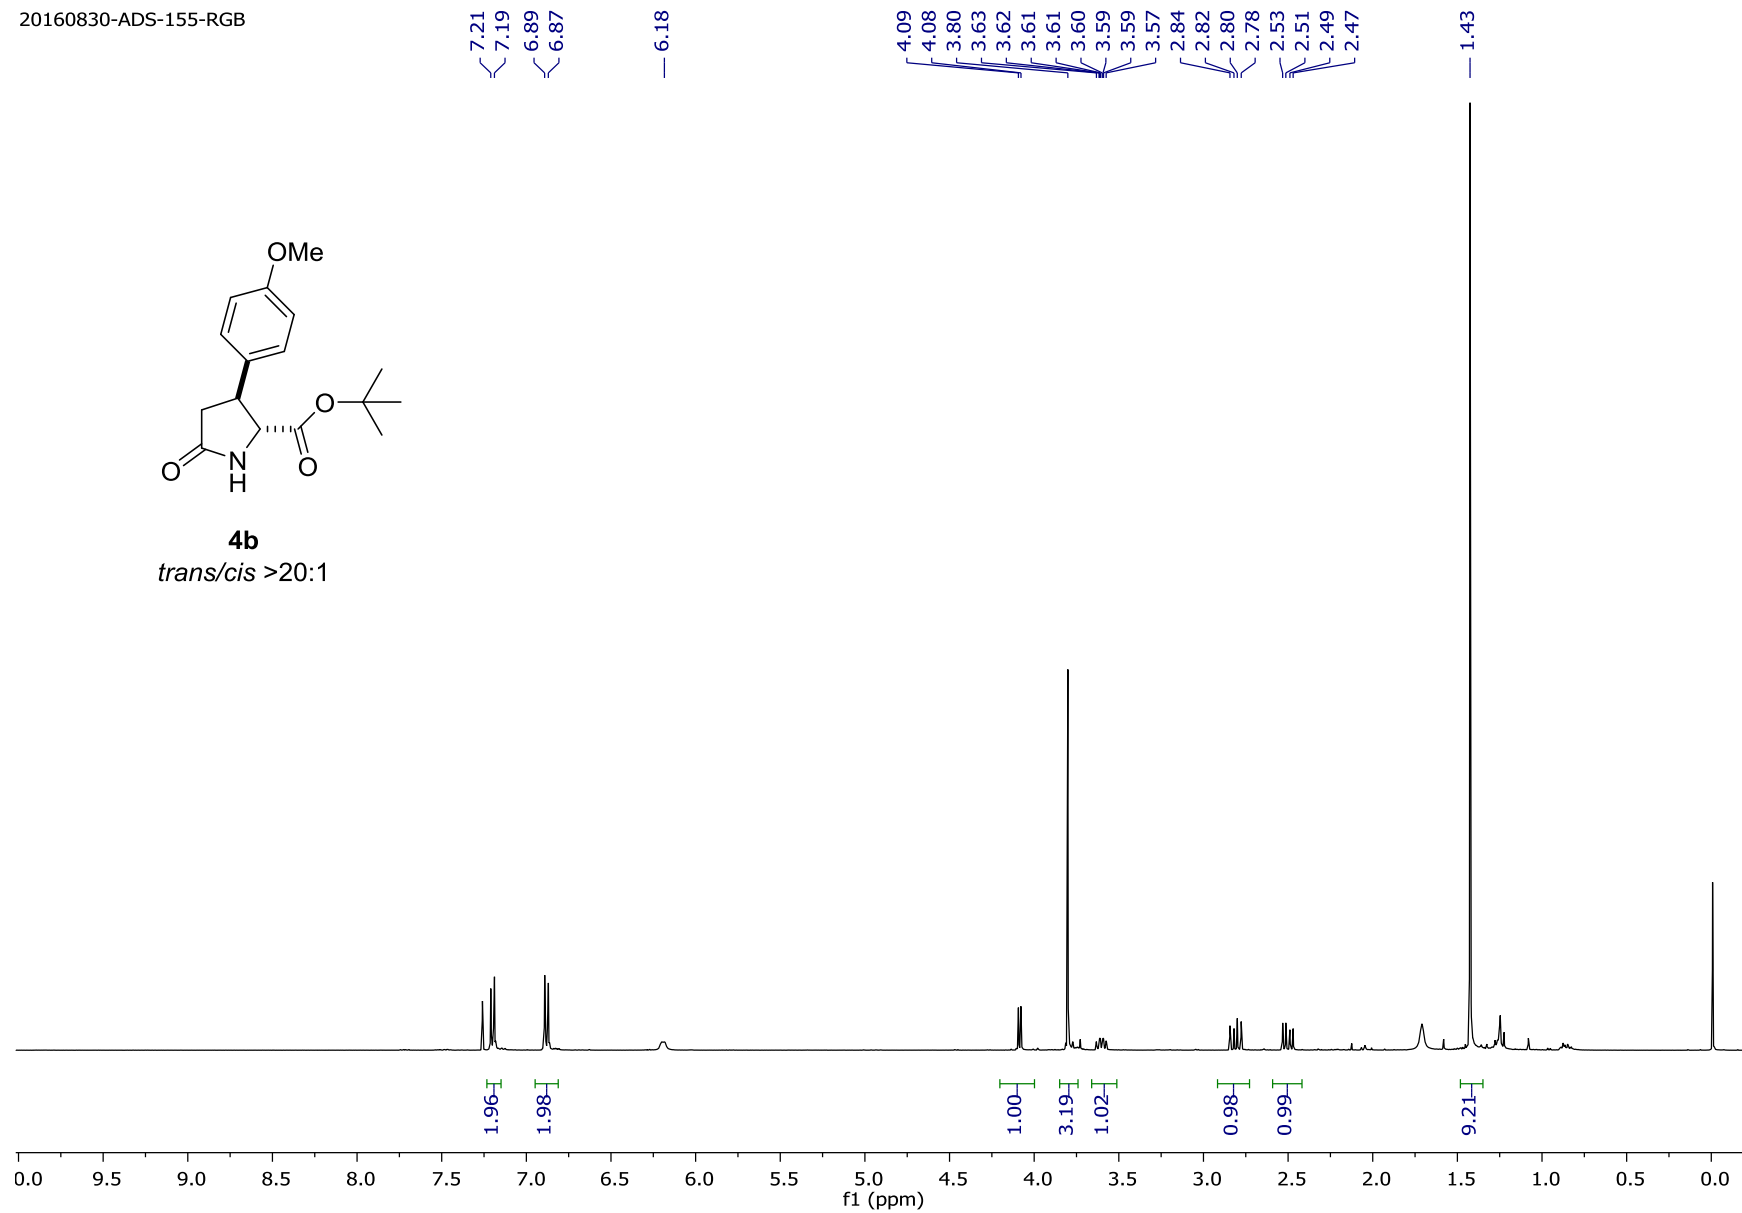

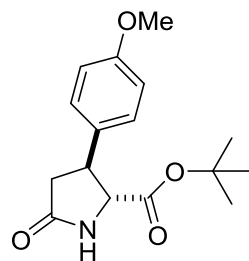

4b

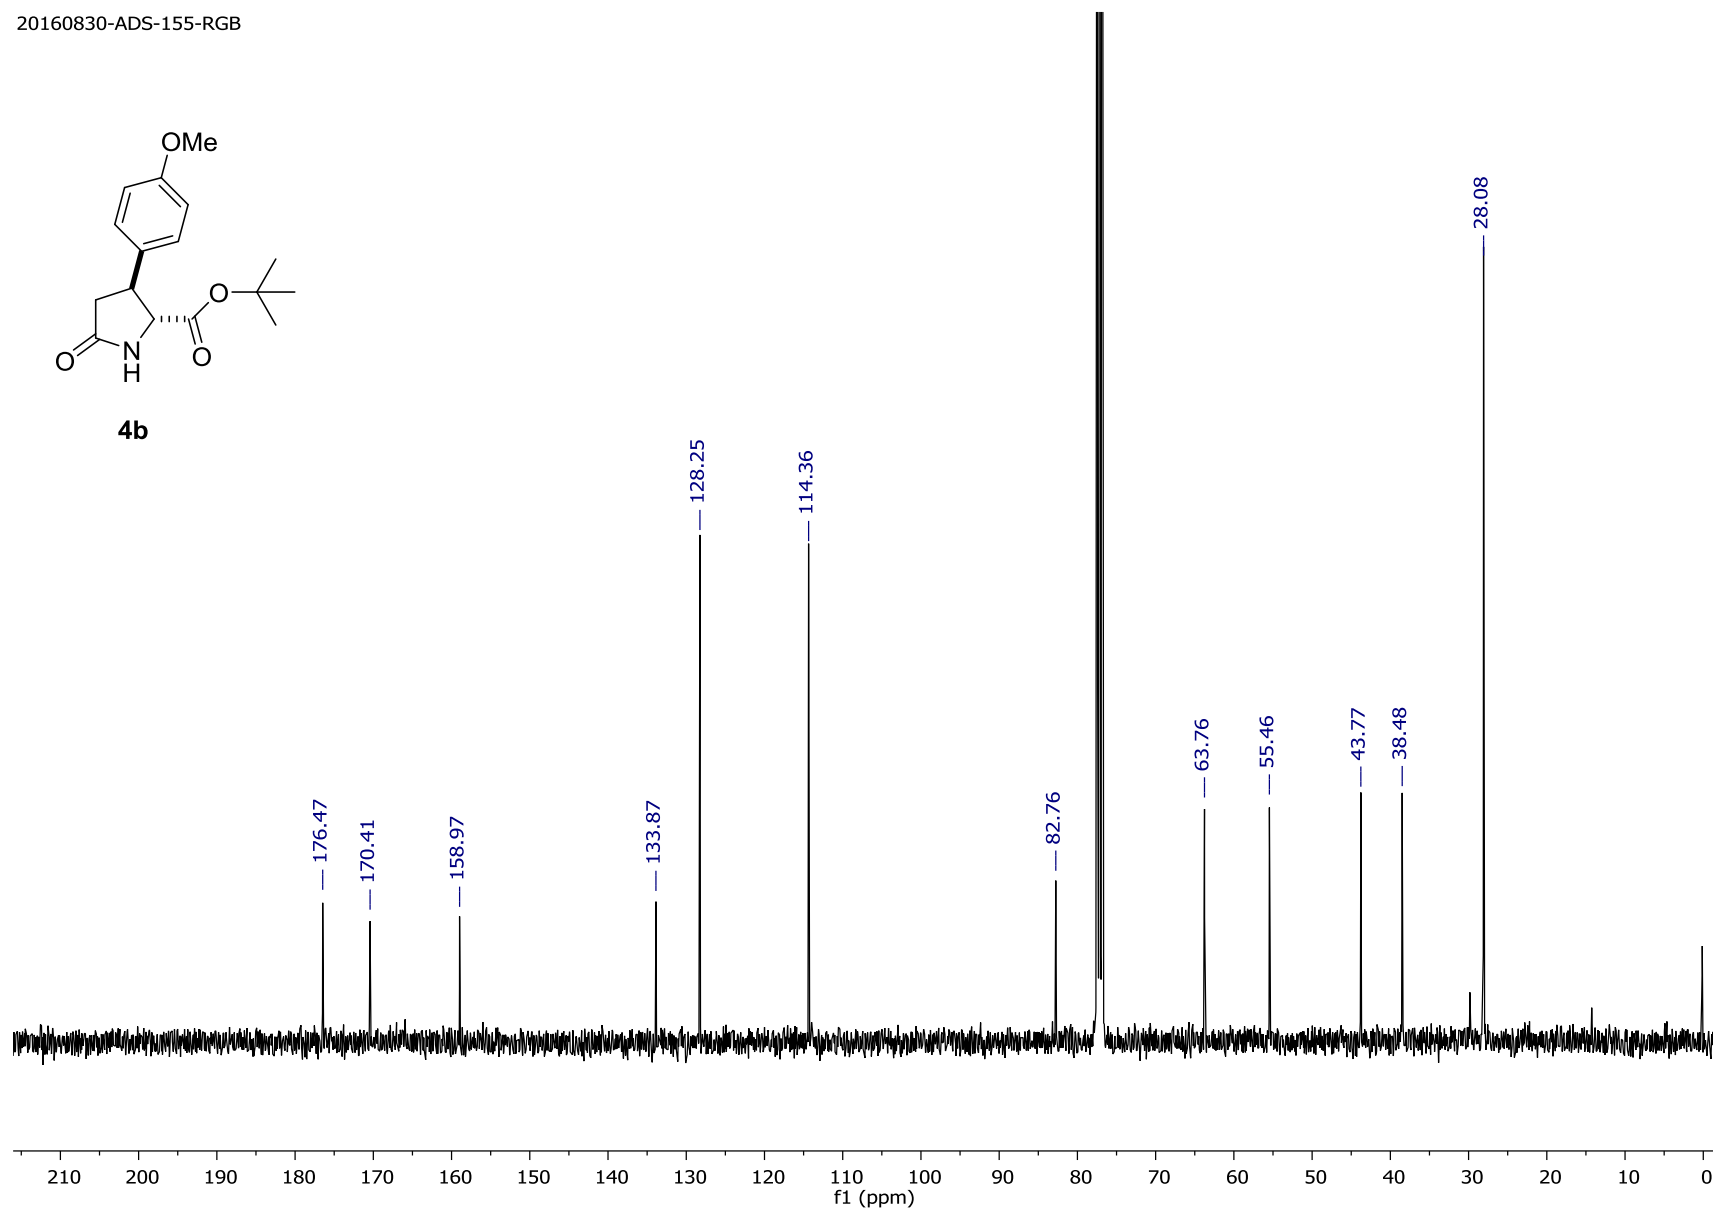

20160907-ADS-165-RGB  
ADS-165-RGB

7.29  
7.28  
7.27  
7.27  
7.26  
7.25  
6.88  
6.86  
6.83  
6.83  
6.83  
6.82  
6.82  
6.81  
6.81  
6.11

4.14  
4.13  
3.81  
3.66  
3.64  
3.63  
3.62  
3.62  
3.61  
3.60  
2.86  
2.84  
2.82  
2.80  
2.56  
2.54  
2.52  
2.50

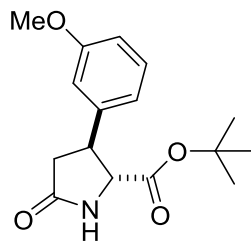

**4c**  
*trans/cis* >20:1

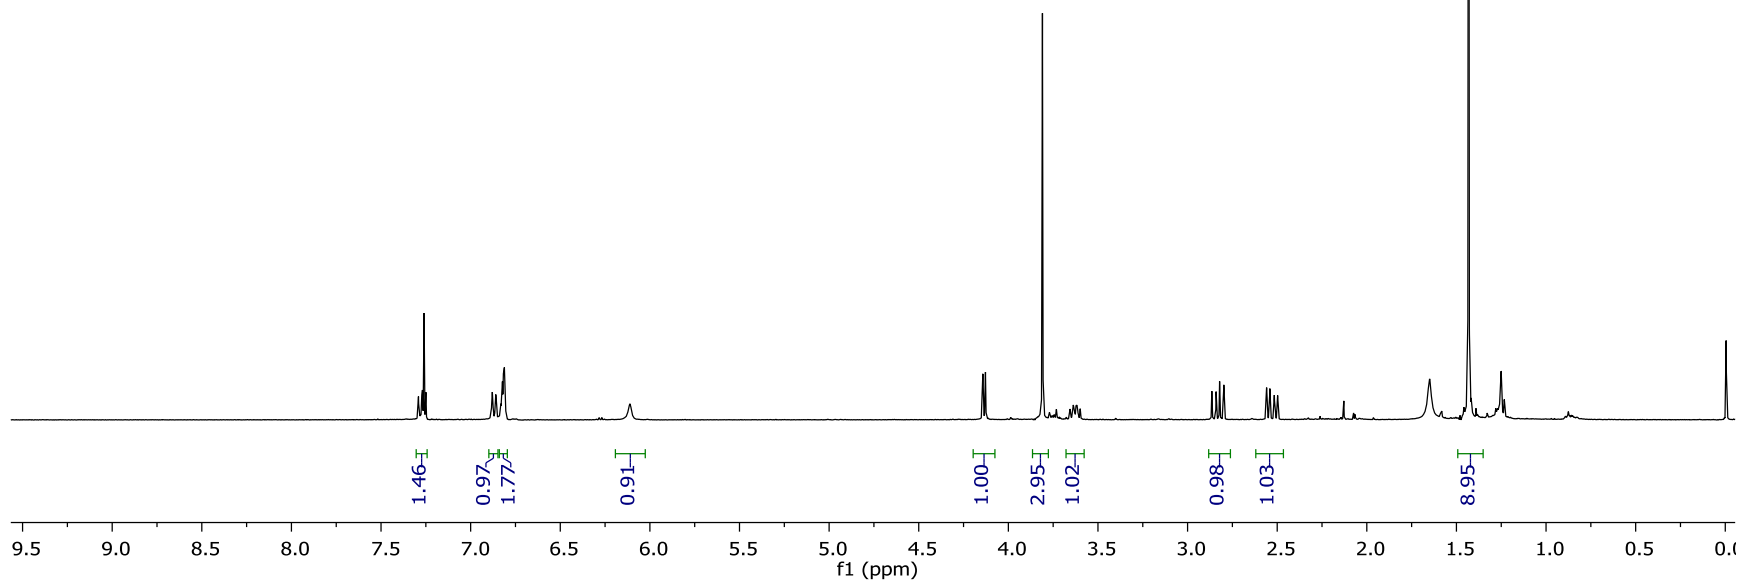

20160907-ADS-165-RGB  
ADS-165-RGB

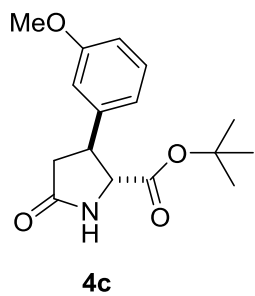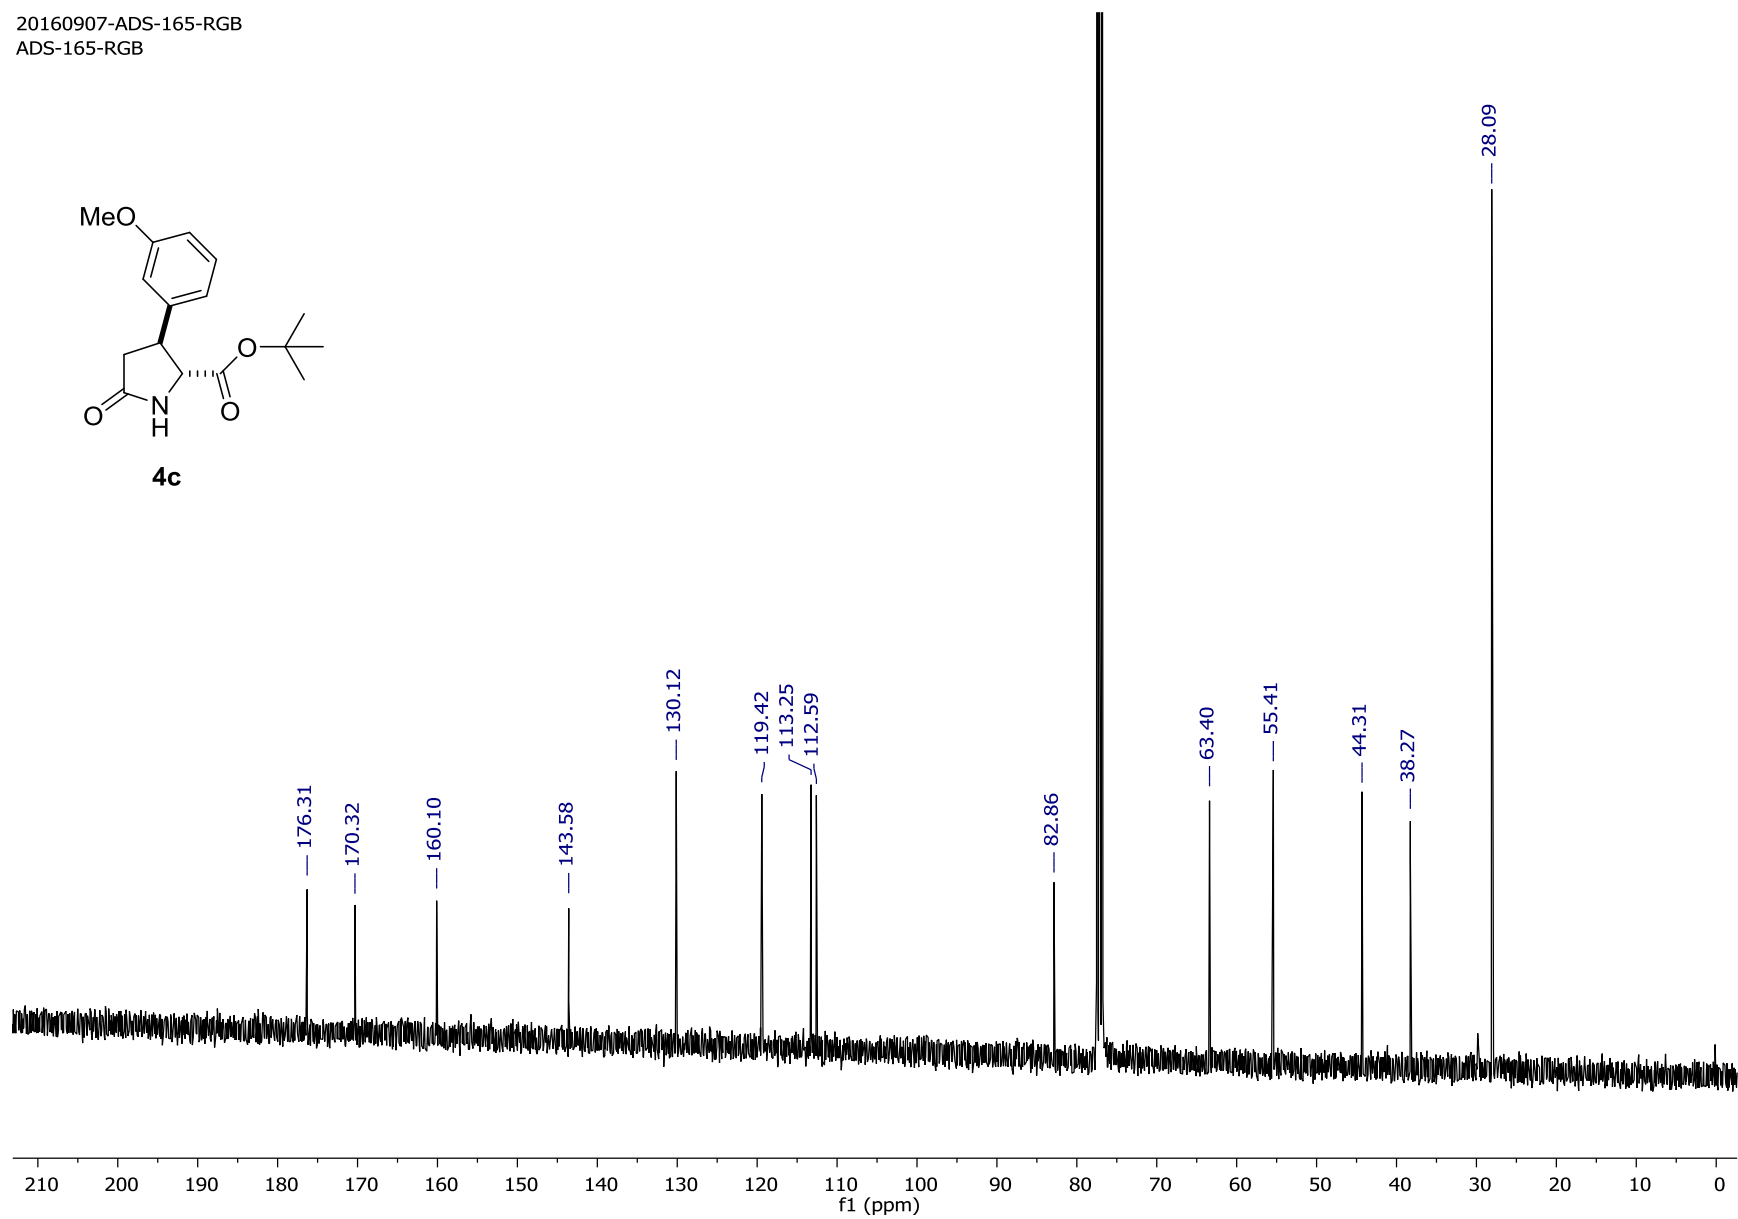

20160907-ADS-168-RGE  
ADS-168-RGE

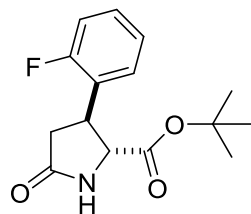

**4d**

*trans/cis* 5:1

*trans+cis* mixture

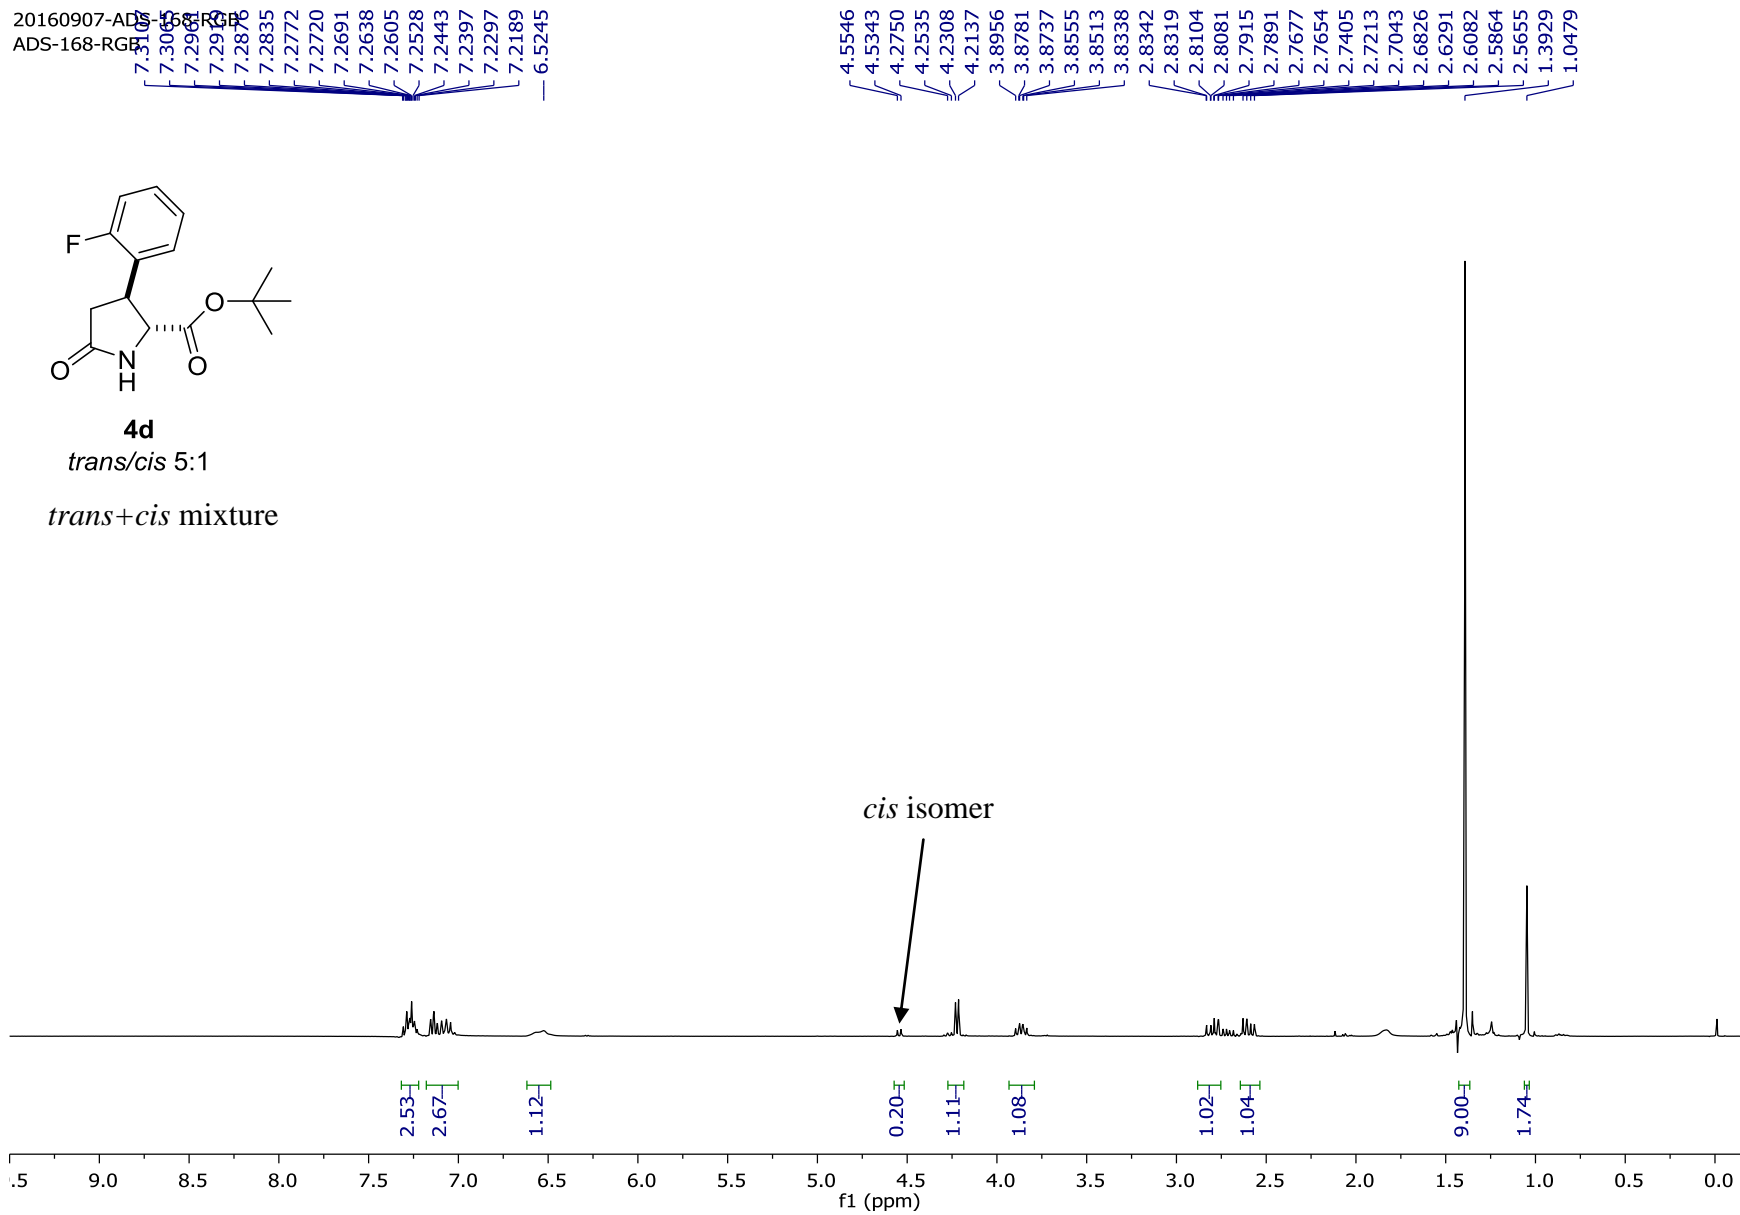



20160907-ADS-168-RGB  
ADS-168-RGB

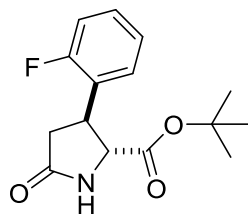

**4d**

*trans+cis* mixture

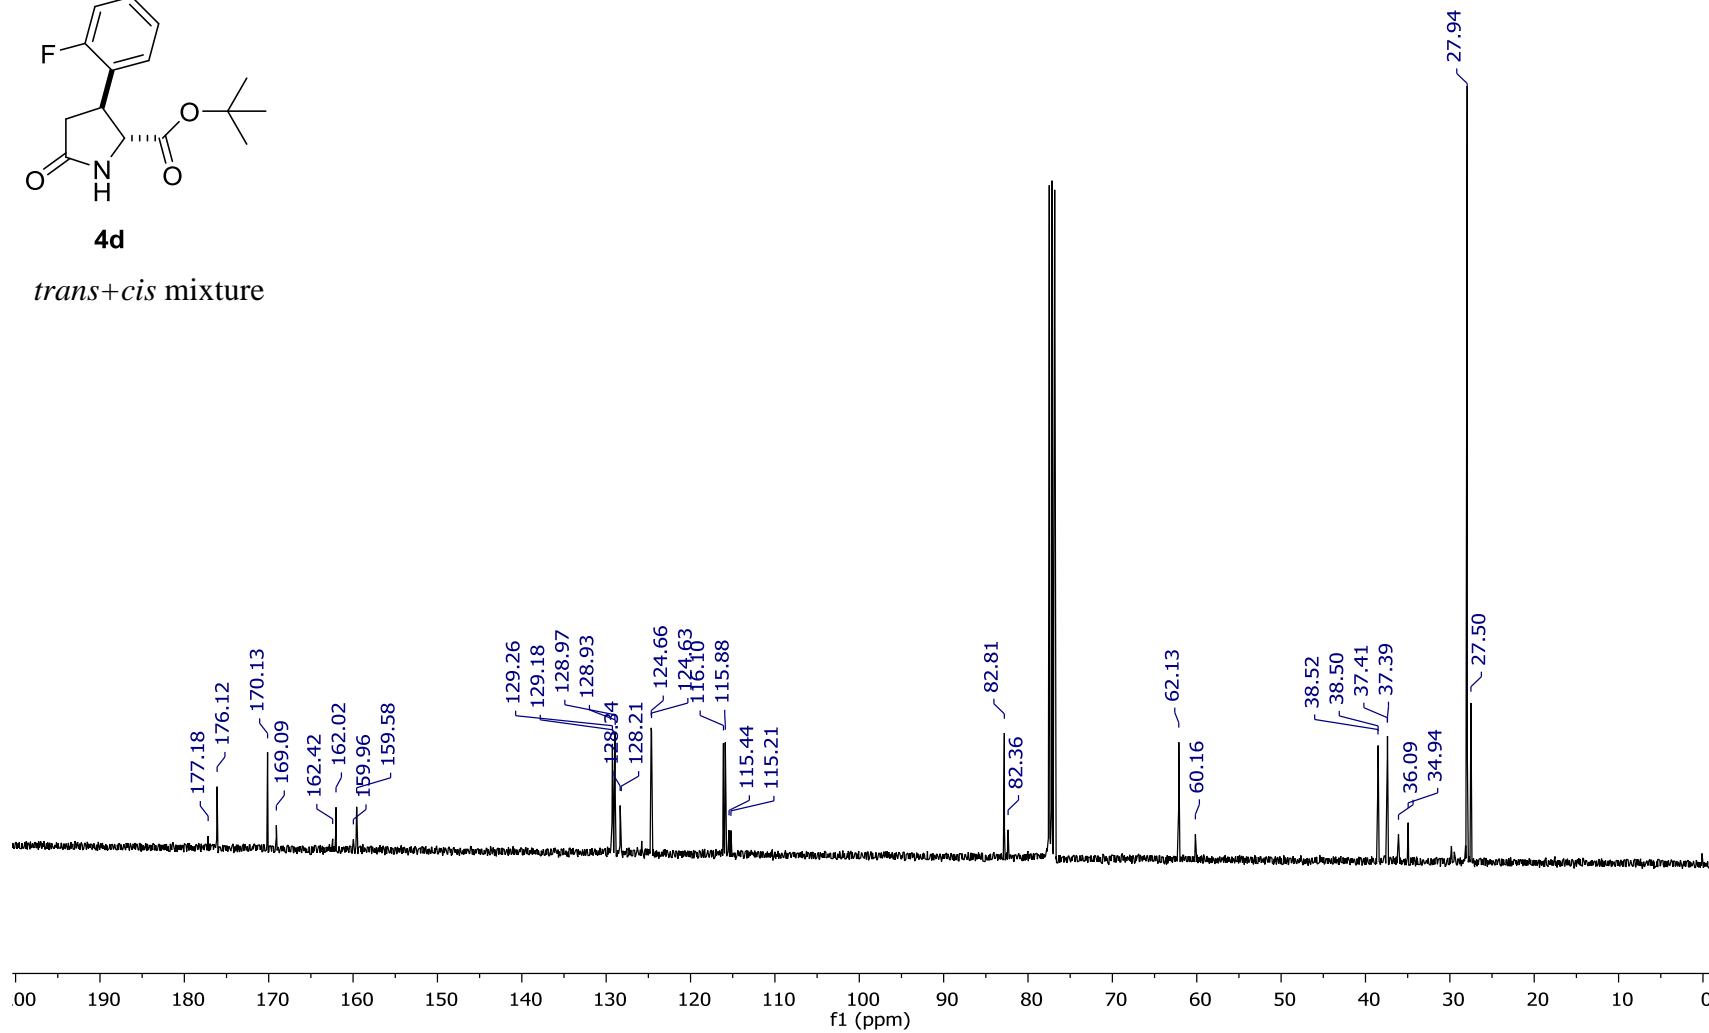

20150908-AD-0118  
 ADS-169-RGB  
 7.31199  
 7.29999  
 7.28799  
 7.06  
 7.02  
 7.01  
 7.01  
 7.00  
 7.00  
 6.99  
 6.99  
 6.98  
 6.97  
 6.96  
 6.96

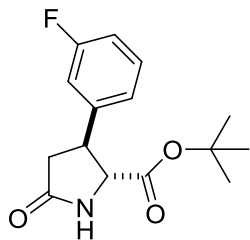

**4e**  
*trans/cis* 5:1  
*trans+cis* mixture

4.50  
 4.48  
 4.13  
 4.12  
 3.92  
 3.91  
 3.90  
 3.89  
 3.72  
 3.68  
 3.66  
 3.65  
 3.64  
 3.64  
 3.62  
 2.87  
 2.85  
 2.83  
 2.82  
 2.81  
 2.80  
 2.78  
 2.76  
 2.67  
 2.66  
 2.63  
 2.62  
 2.54  
 2.52  
 2.49  
 2.48  
 1.43  
 1.09

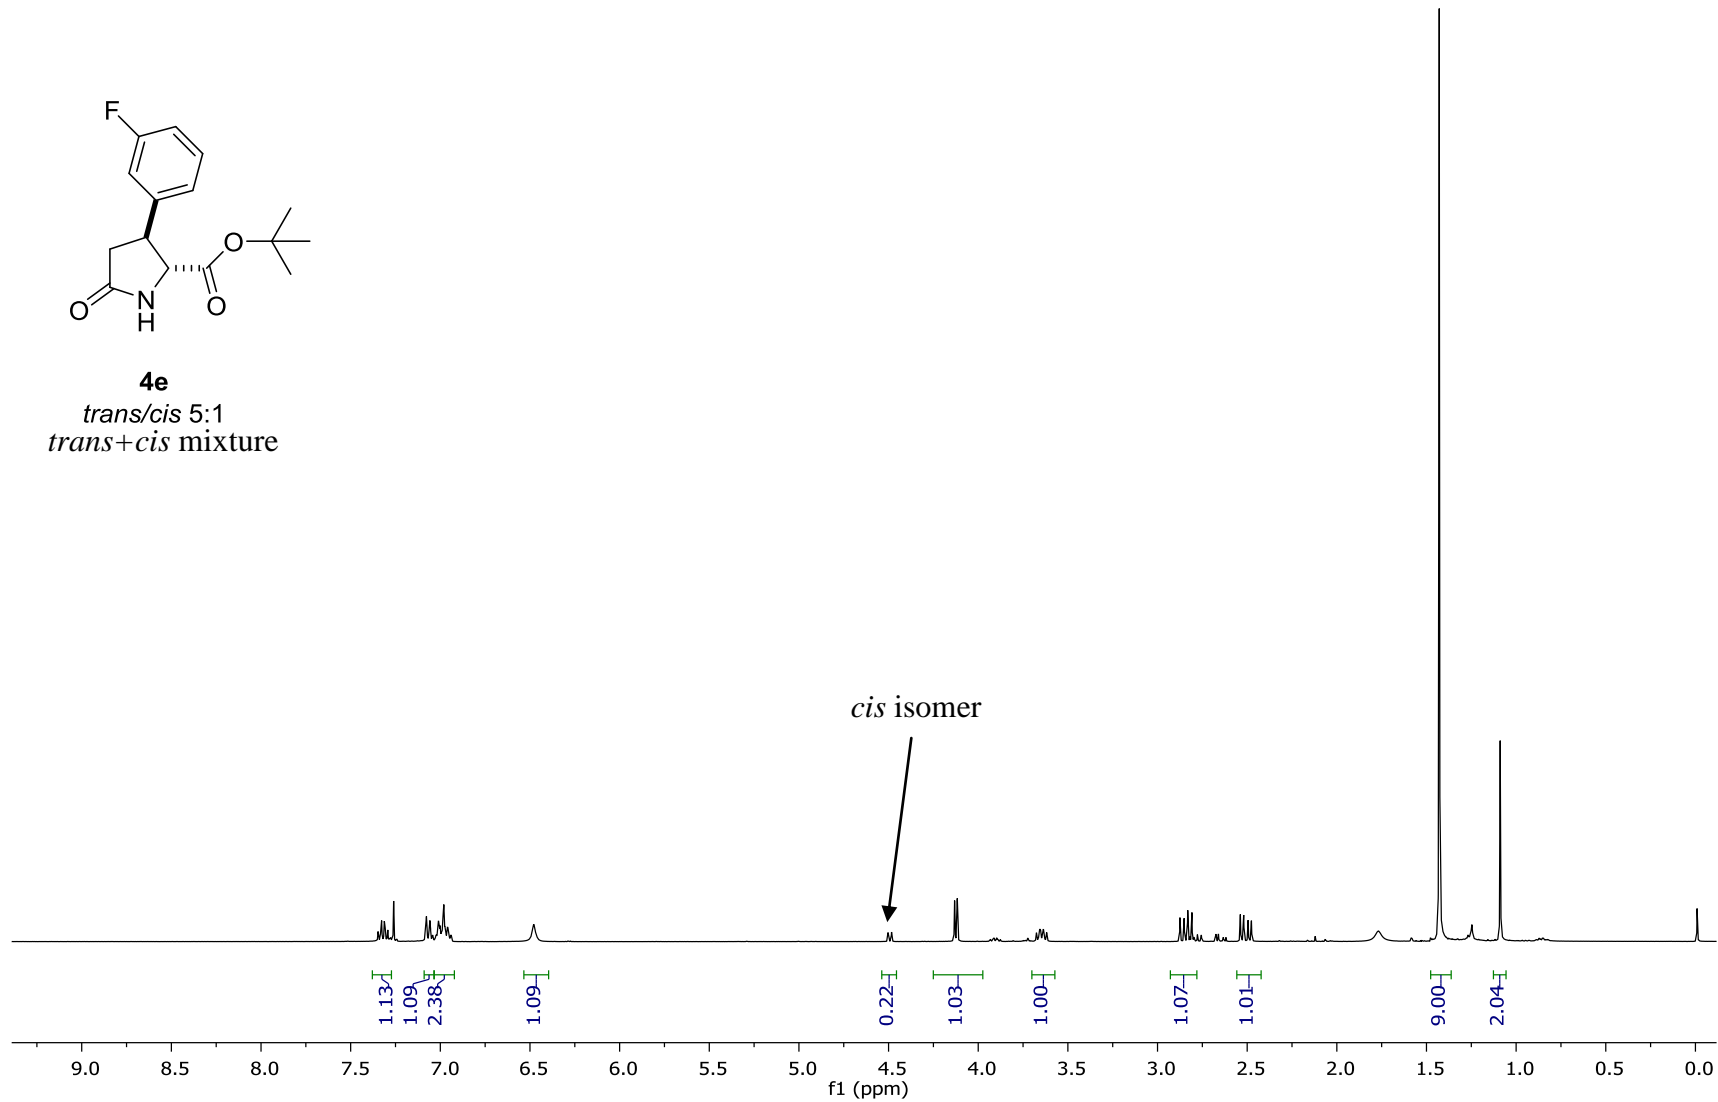

20160908-ADS-169-RGB  
ADS-169-RGB

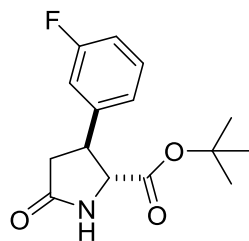

**4e**

*trans+cis* mixture

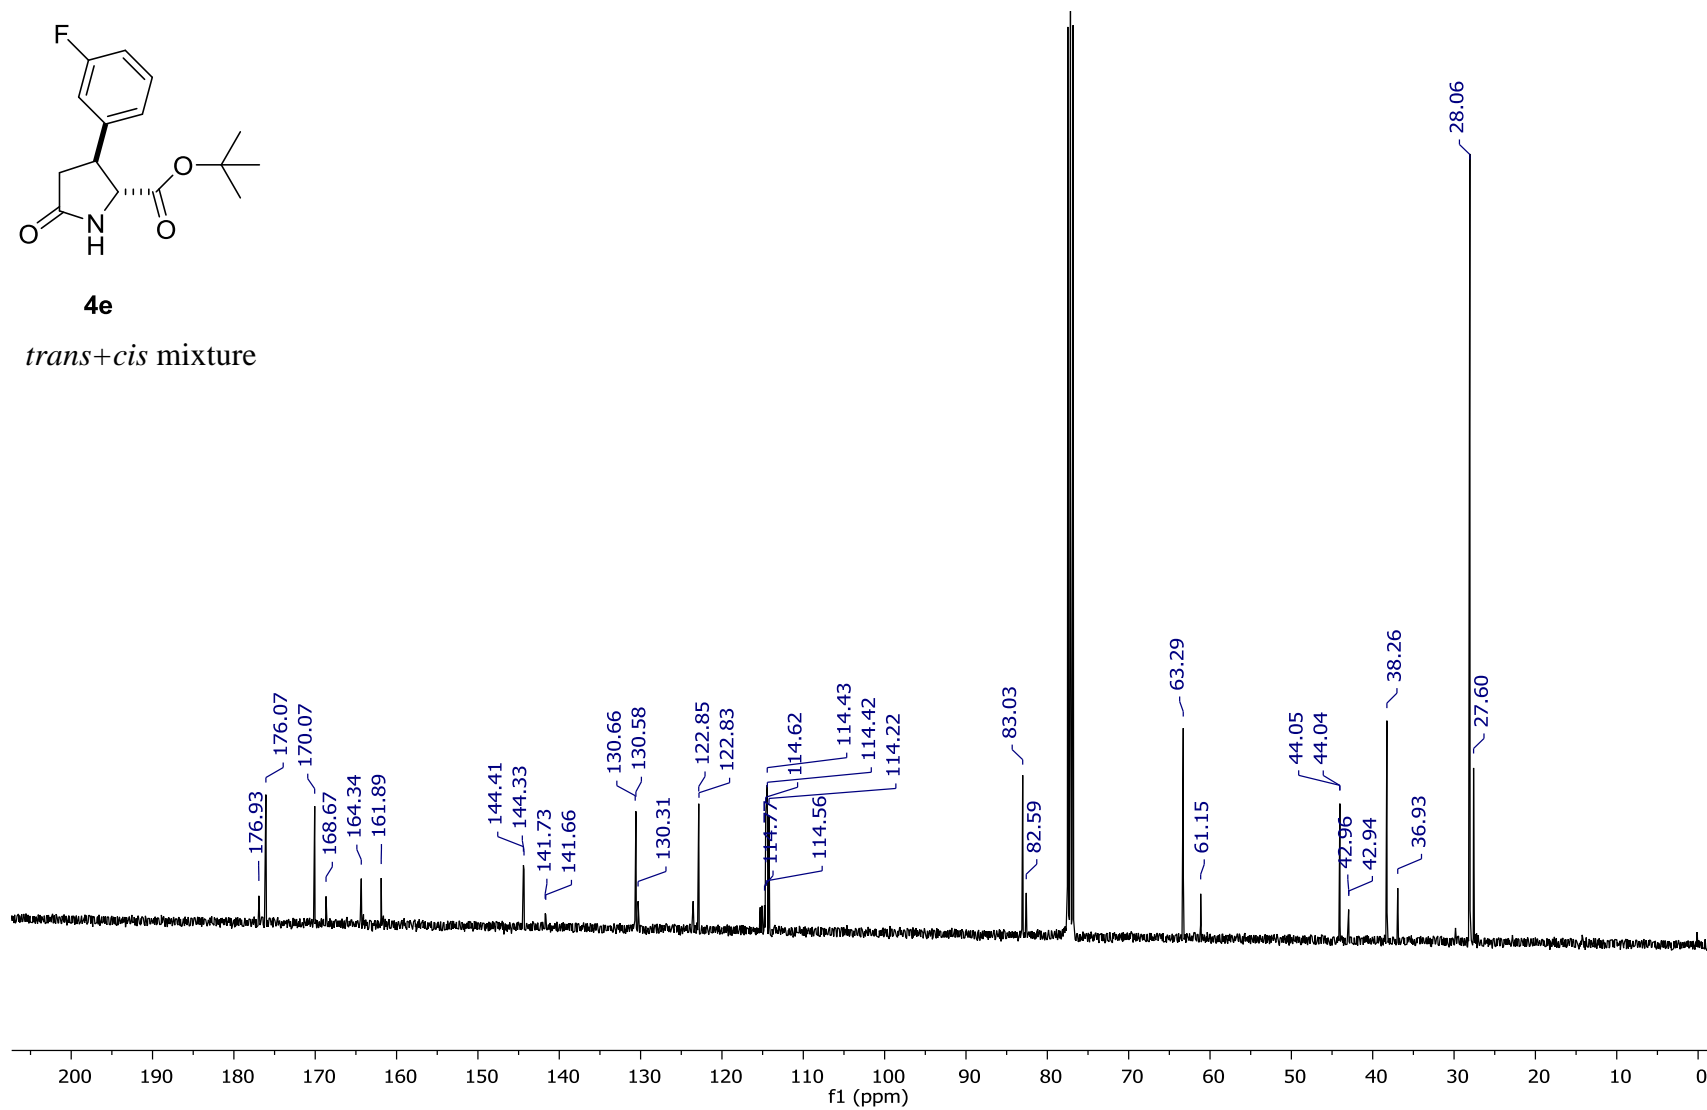

20160901-ADS-154-RCB  
ADS-164-RGB

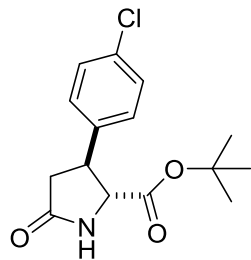

**4f**

*trans/cis* 4:1

*trans+cis* mixture

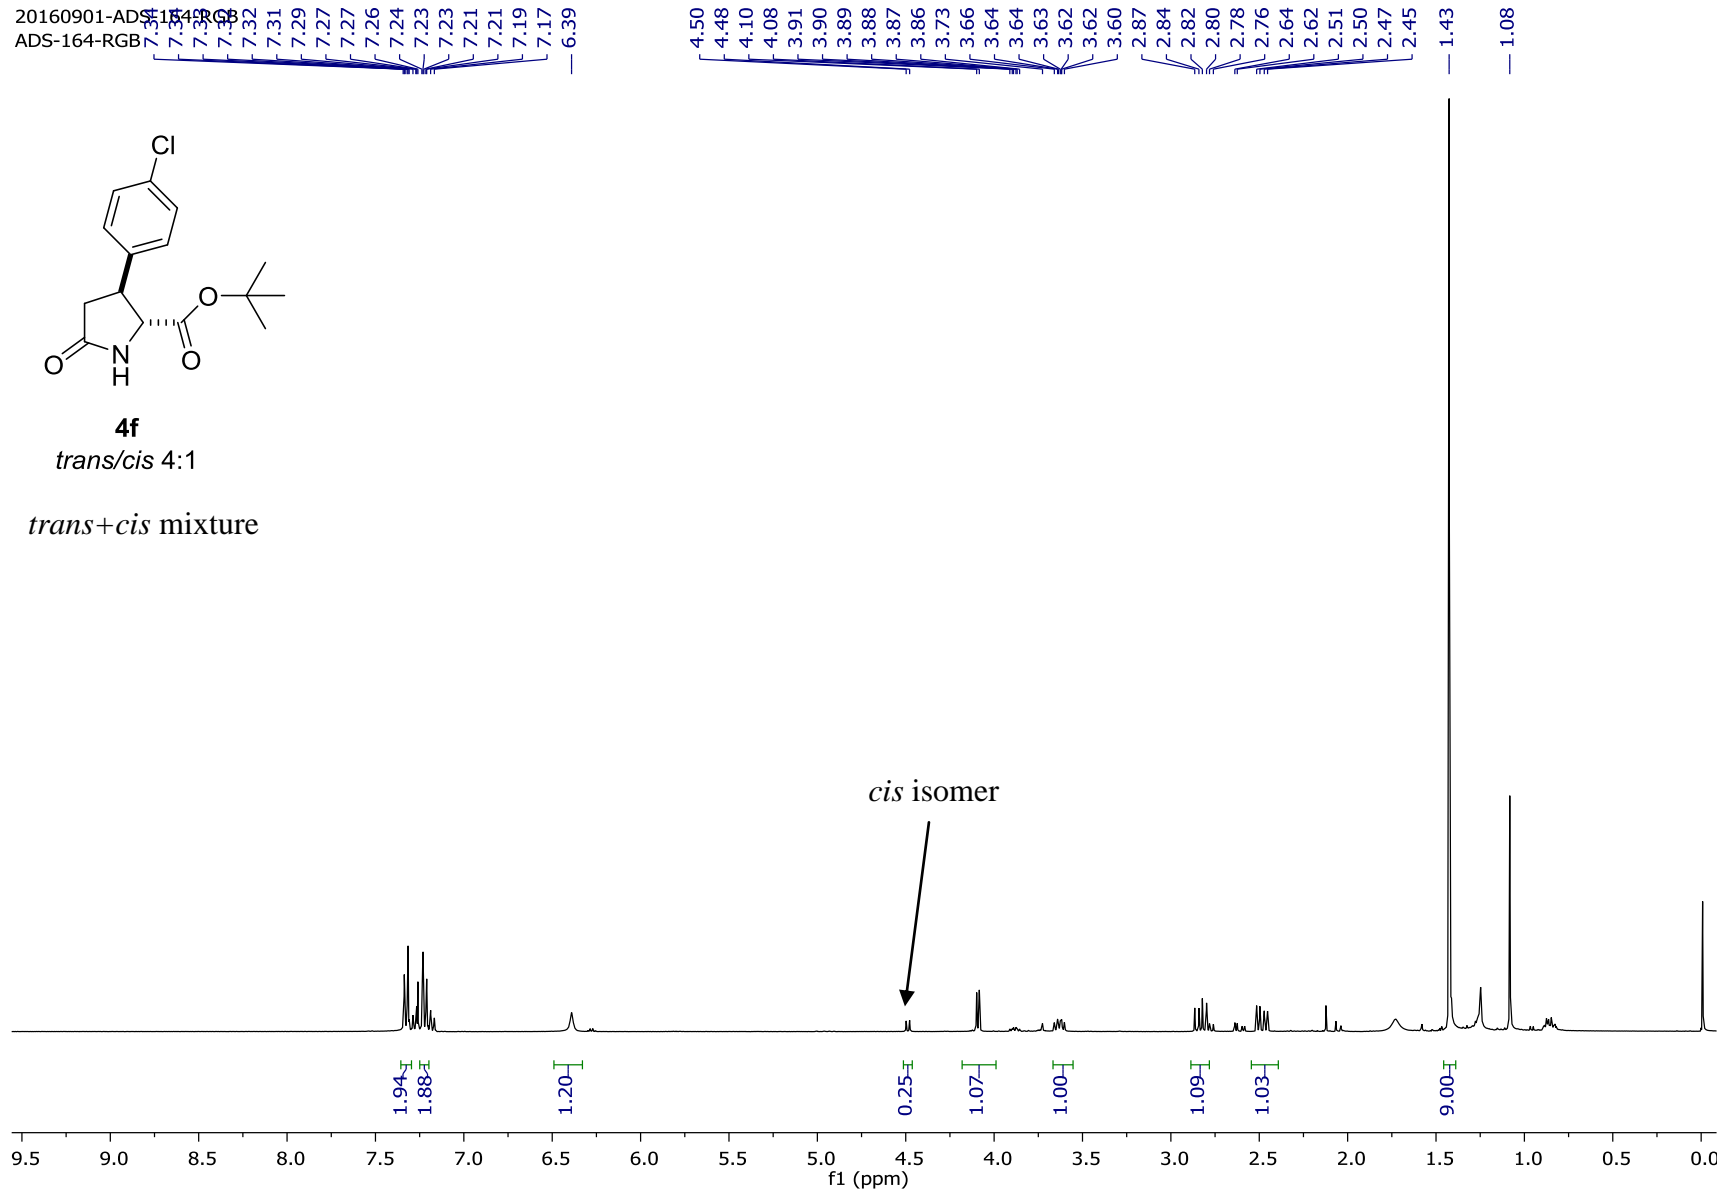

20160901-ADS-164-RGB  
ADS-164-RGB

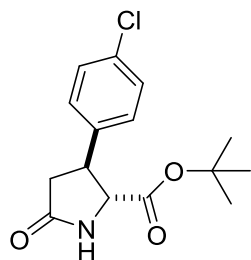

**4f**

*trans+cis* mixture

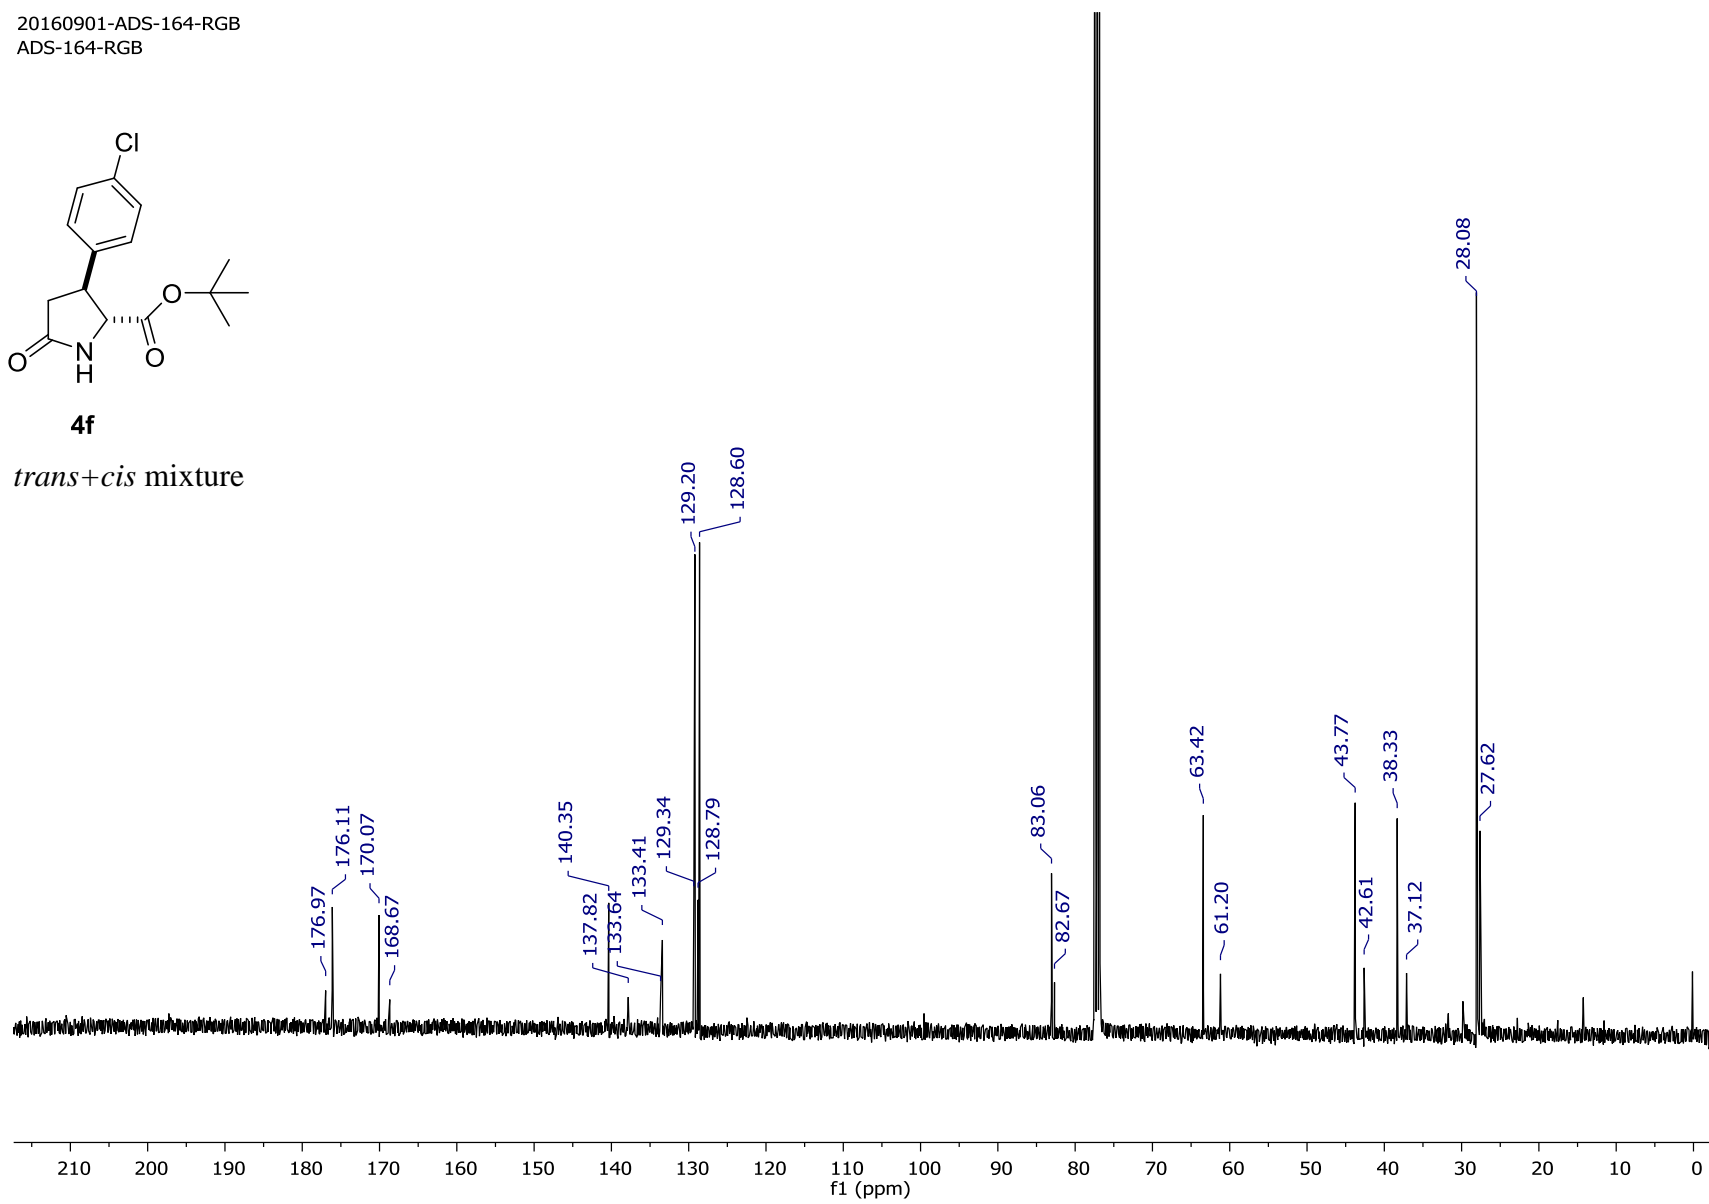

20160908AD  
 ADS-170-RGB  
 7.519  
 7.391  
 7.388  
 7.333  
 7.333  
 7.32  
 7.31  
 7.30  
 7.30  
 7.29  
 7.28  
 7.27  
 7.16  
 7.16  
 7.15  
 7.15  
 7.14  
 7.14  
 7.14  
 7.13  
 7.13  
 7.12  
 7.12  
 6.31  
 6.28  
 4.69  
 4.69  
 4.67  
 4.66  
 4.46  
 4.44  
 4.42  
 4.40  
 4.21  
 4.21  
 4.20  
 4.19  
 4.19  
 4.18  
 4.17  
 4.16  
 2.92  
 2.90  
 2.89  
 2.88  
 2.87  
 2.86  
 2.85  
 2.78  
 2.76  
 2.74  
 2.72  
 2.72  
 2.69  
 2.67  
 2.65  
 2.47  
 2.46  
 2.43  
 2.43  
 2.42  
 2.41  
 1.43  
 1.05

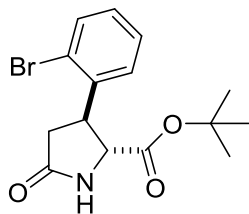

**4g**  
*trans/cis* 2.5:1  
*trans+cis* mixture

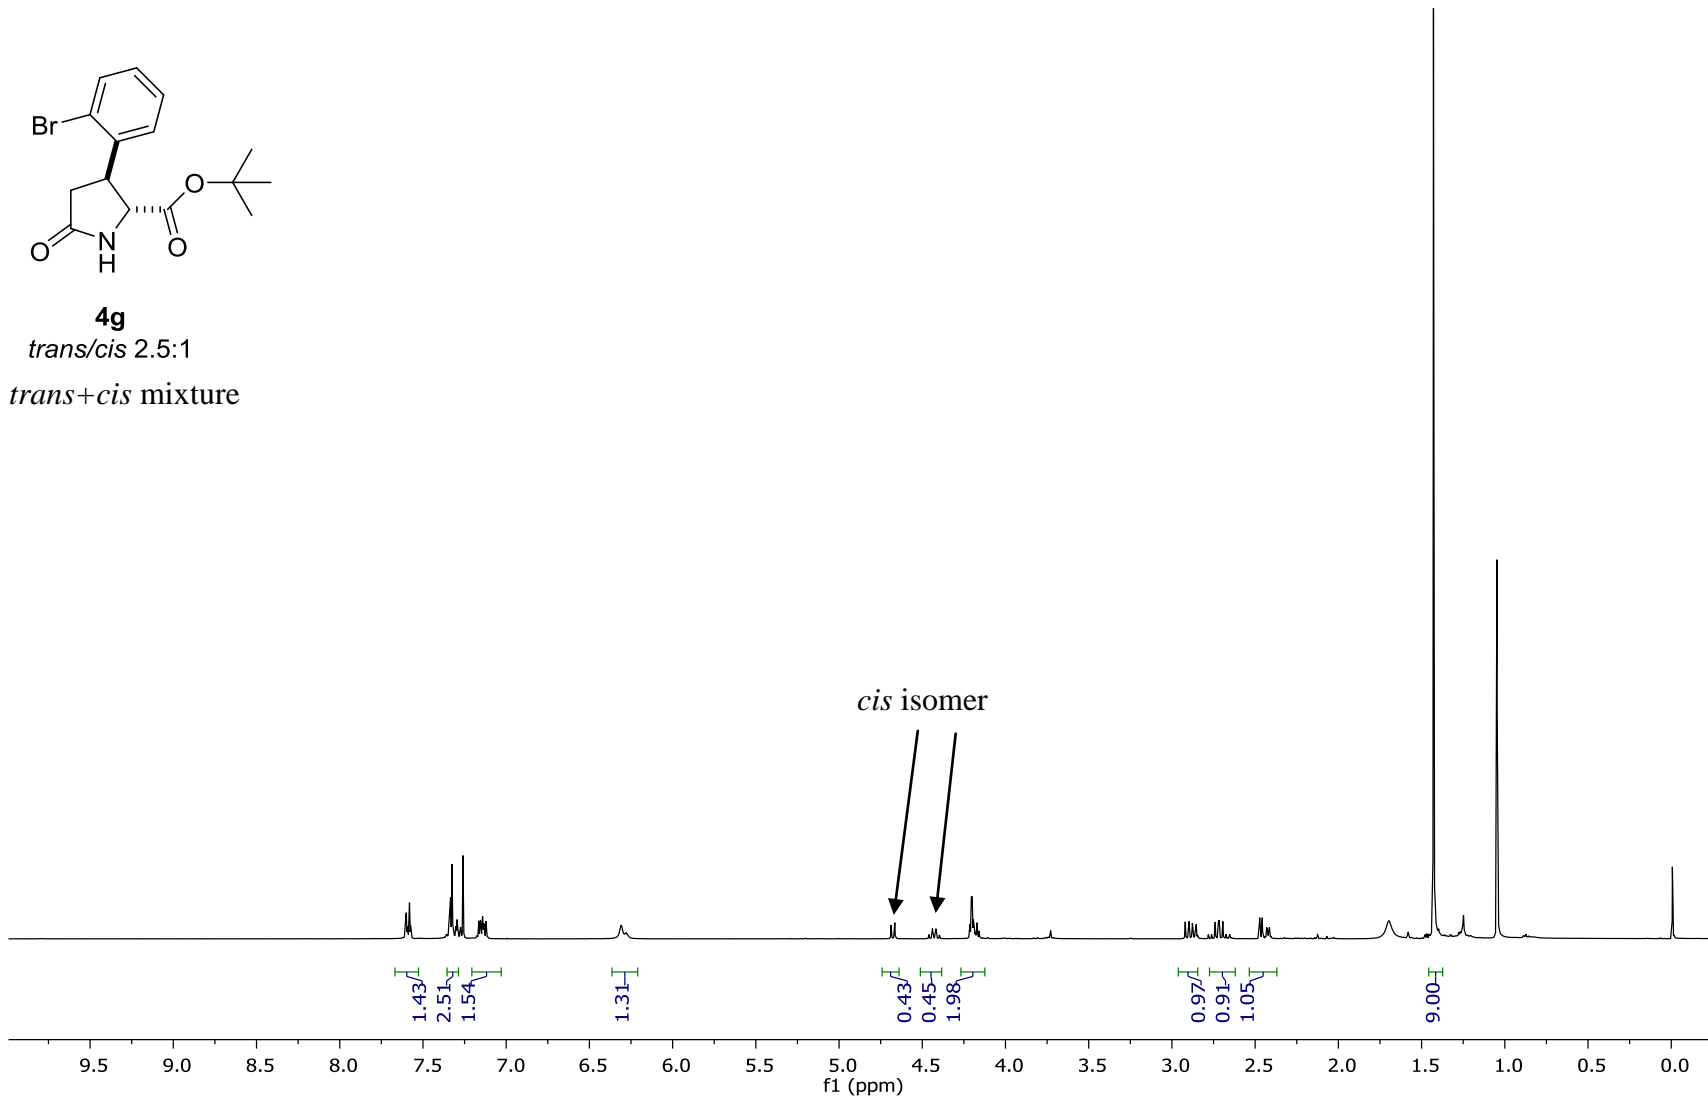

20160908-ADS-170-RGB  
ADS-170-RGB

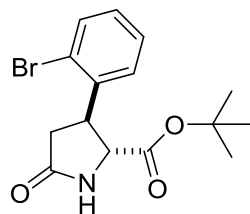

**4g**

*trans+cis* mixture

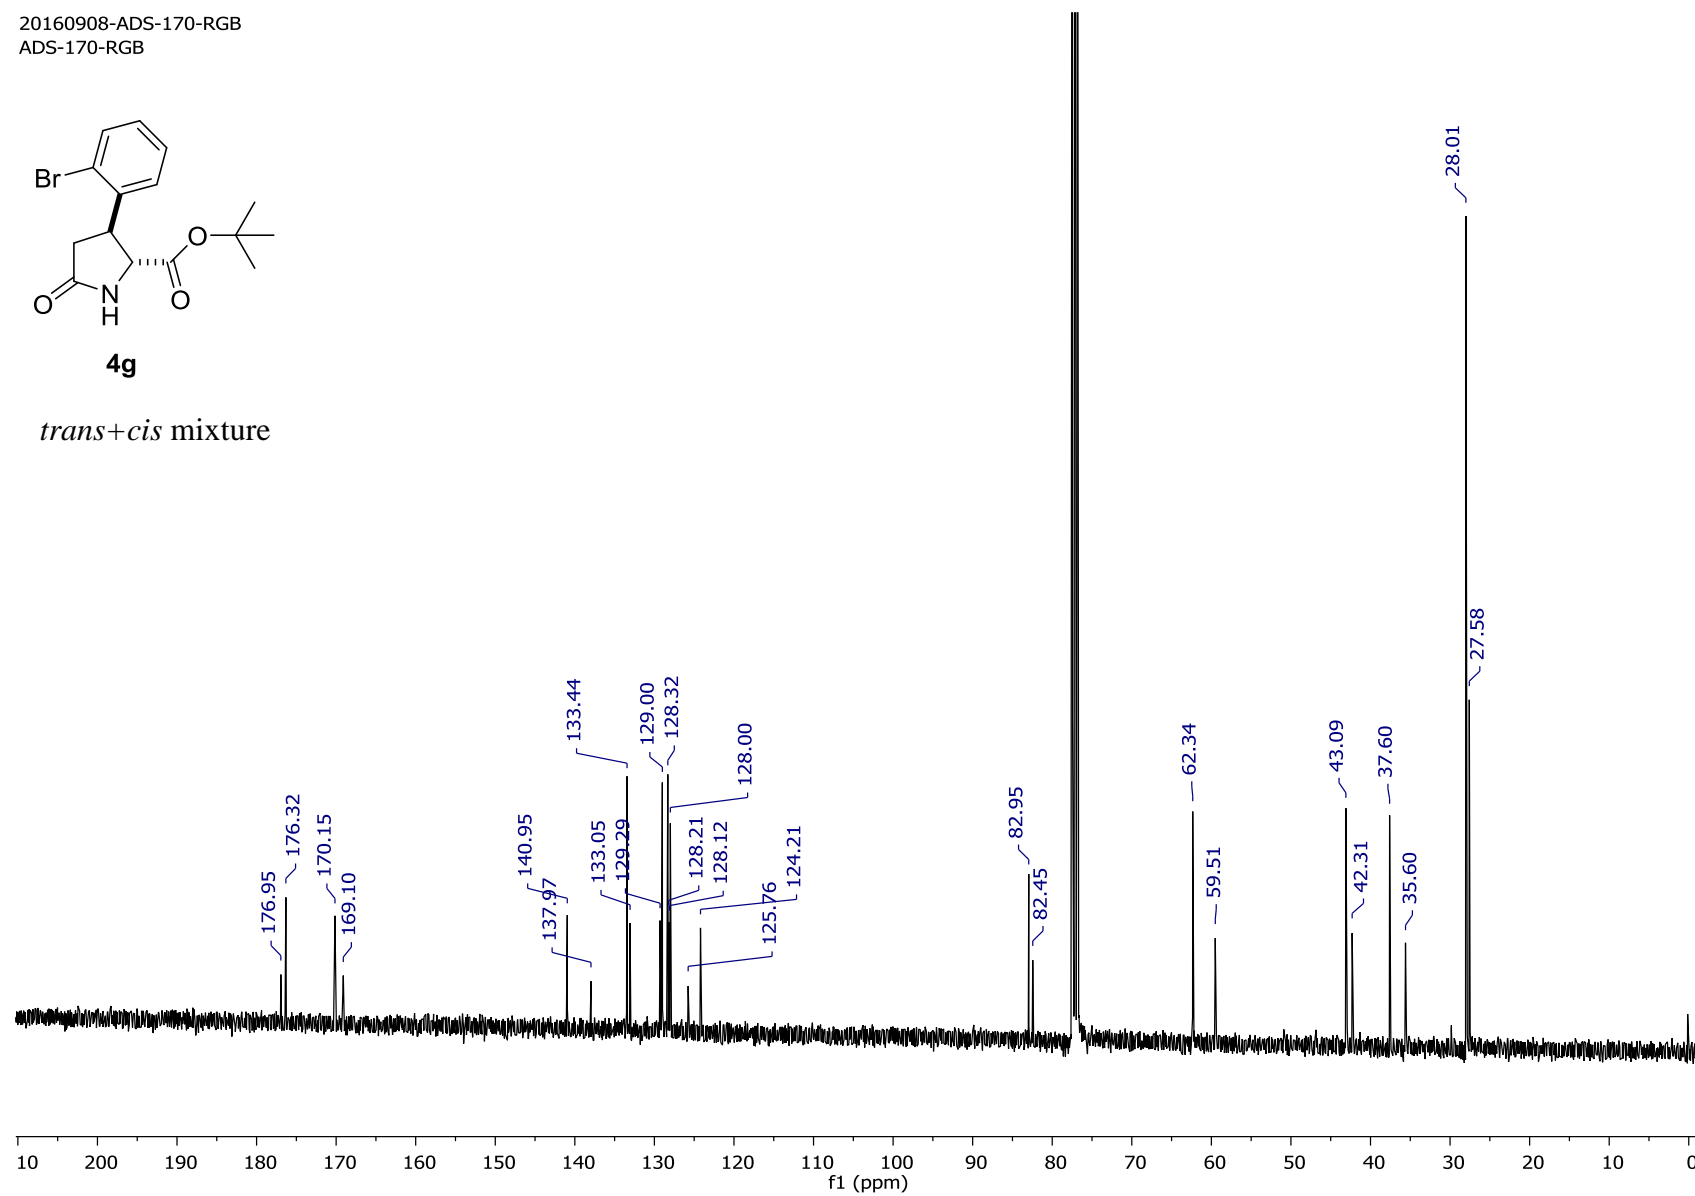

20180416-PKW-4-CYANO  
PKW-4-CYANO

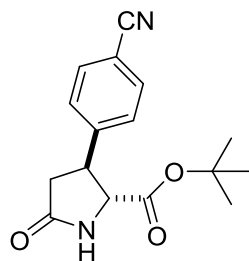

**4h**  
*trans/cis* >20:1

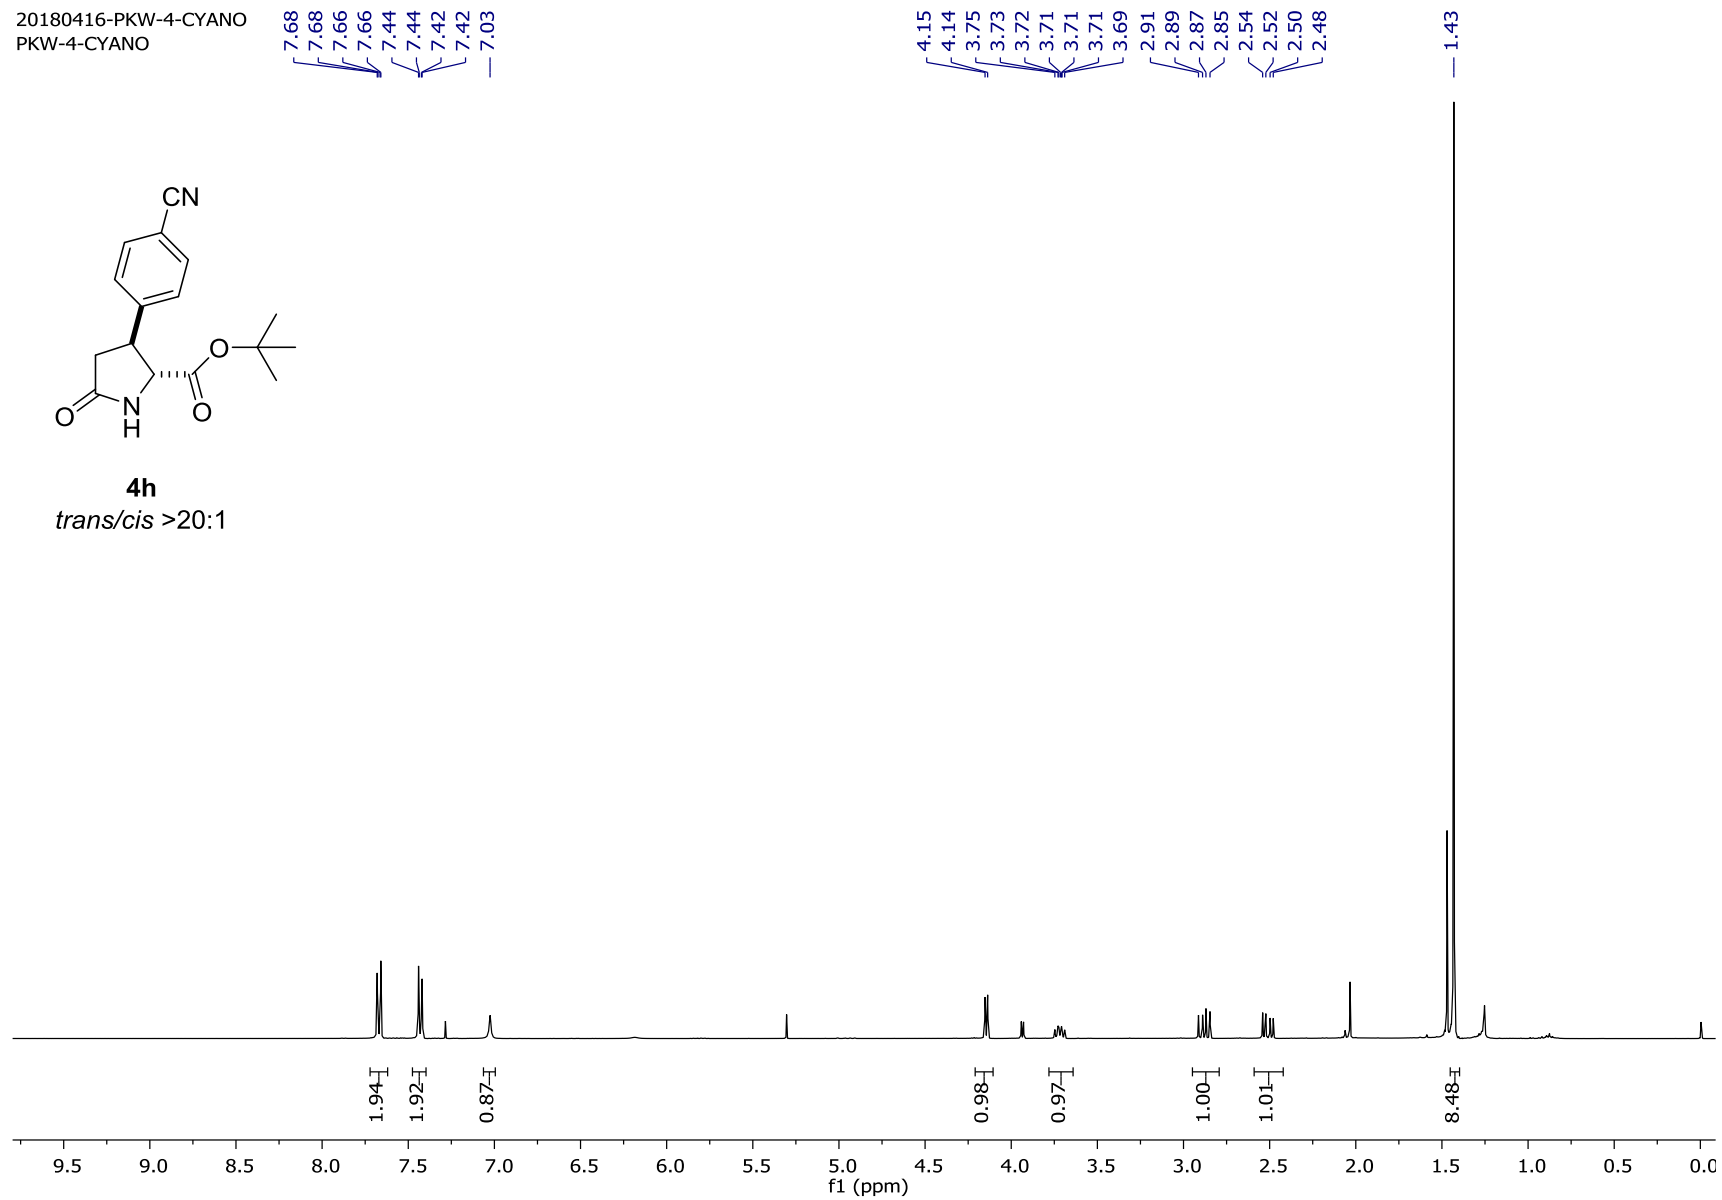



20180416-PKW-4-CYANO  
PKW-4-CYANO

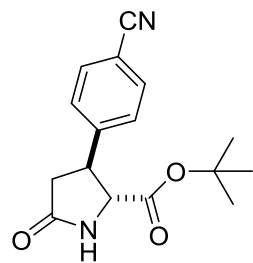

**4h**

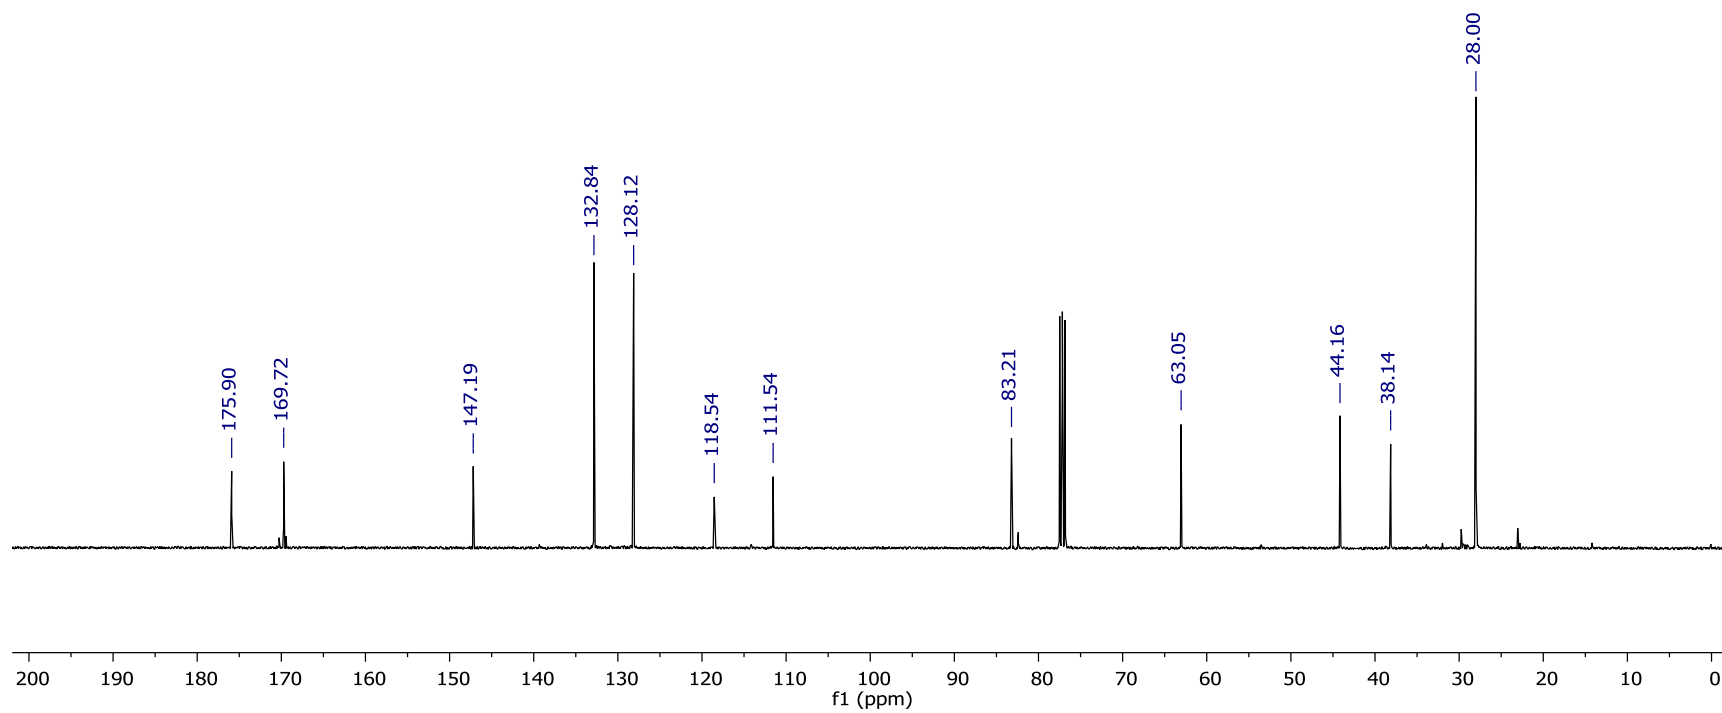

20160906-ADS-166-RGB  
ADS-166-RGB

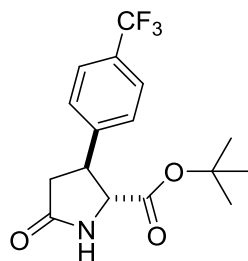

**4i**  
*trans/cis* >20:1  
*trans+cis* mixture

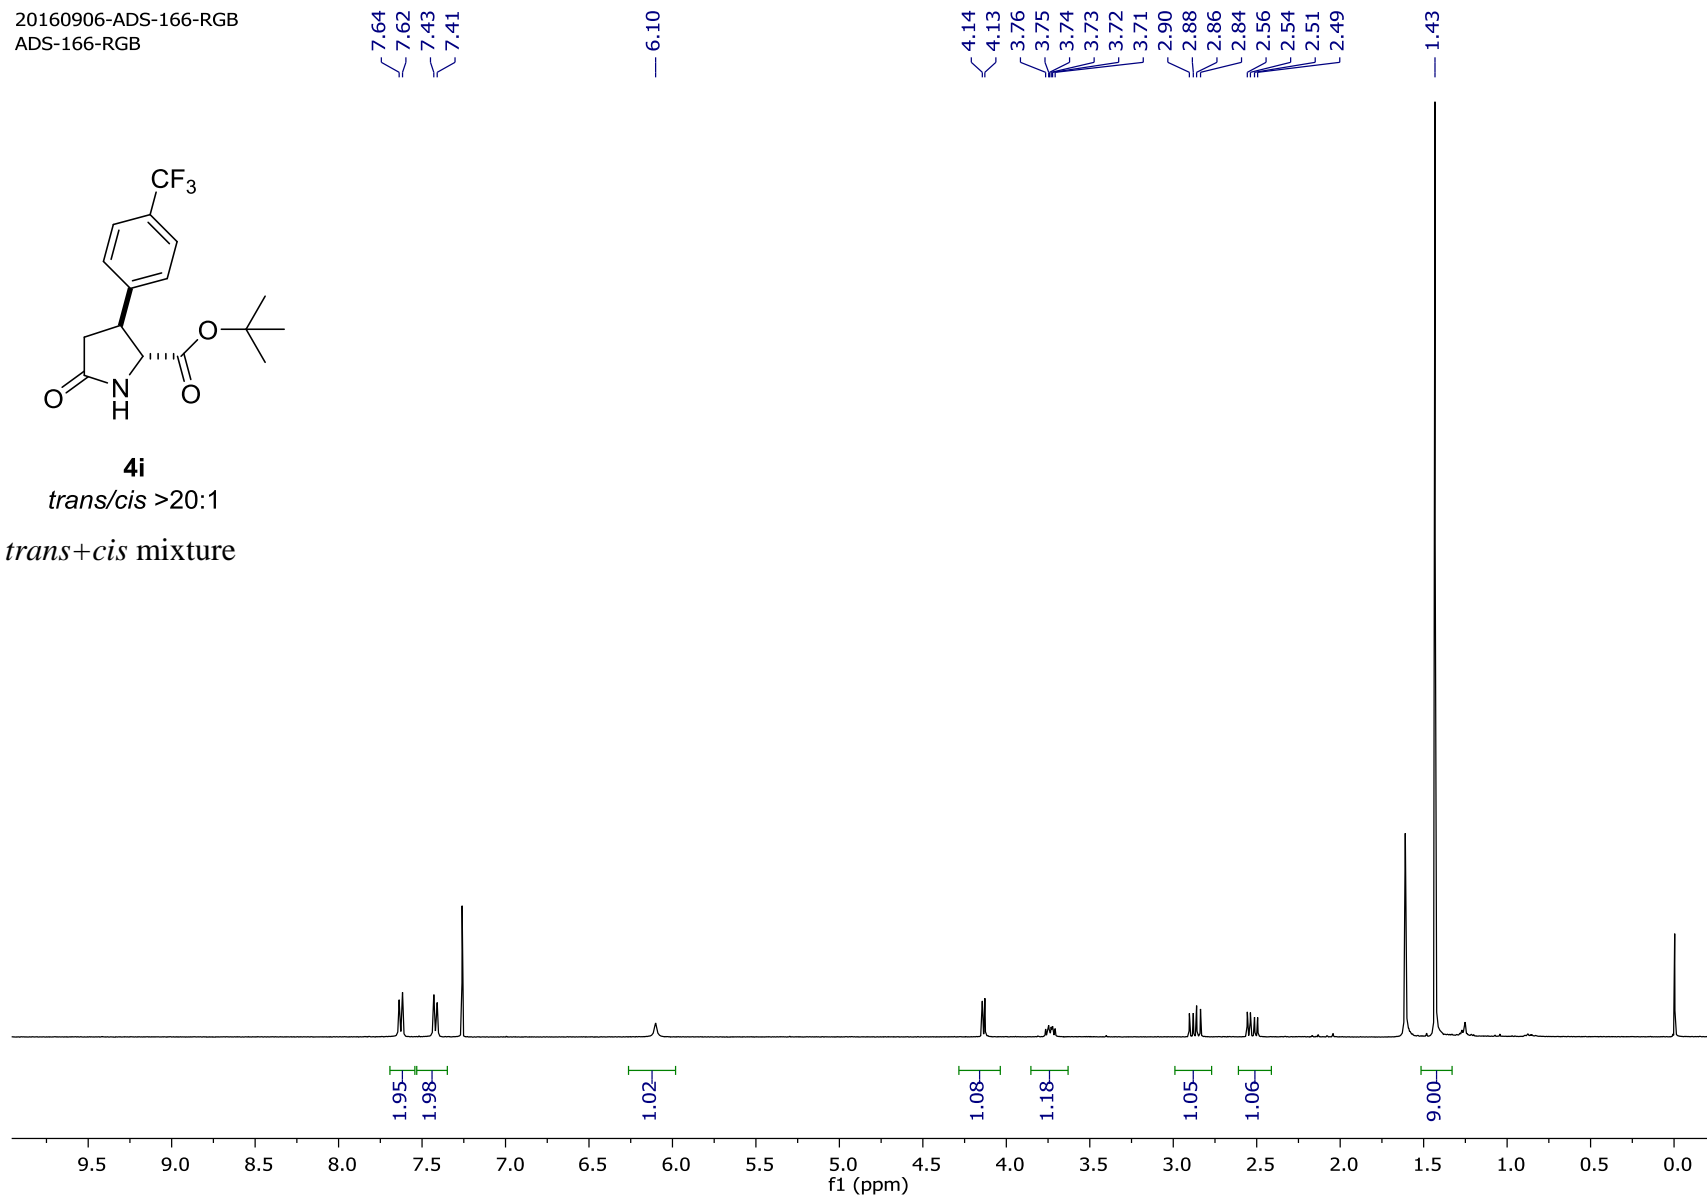

20160907-ADS-166-RGB  
ADS-166-RGB

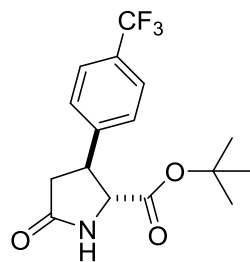

4i

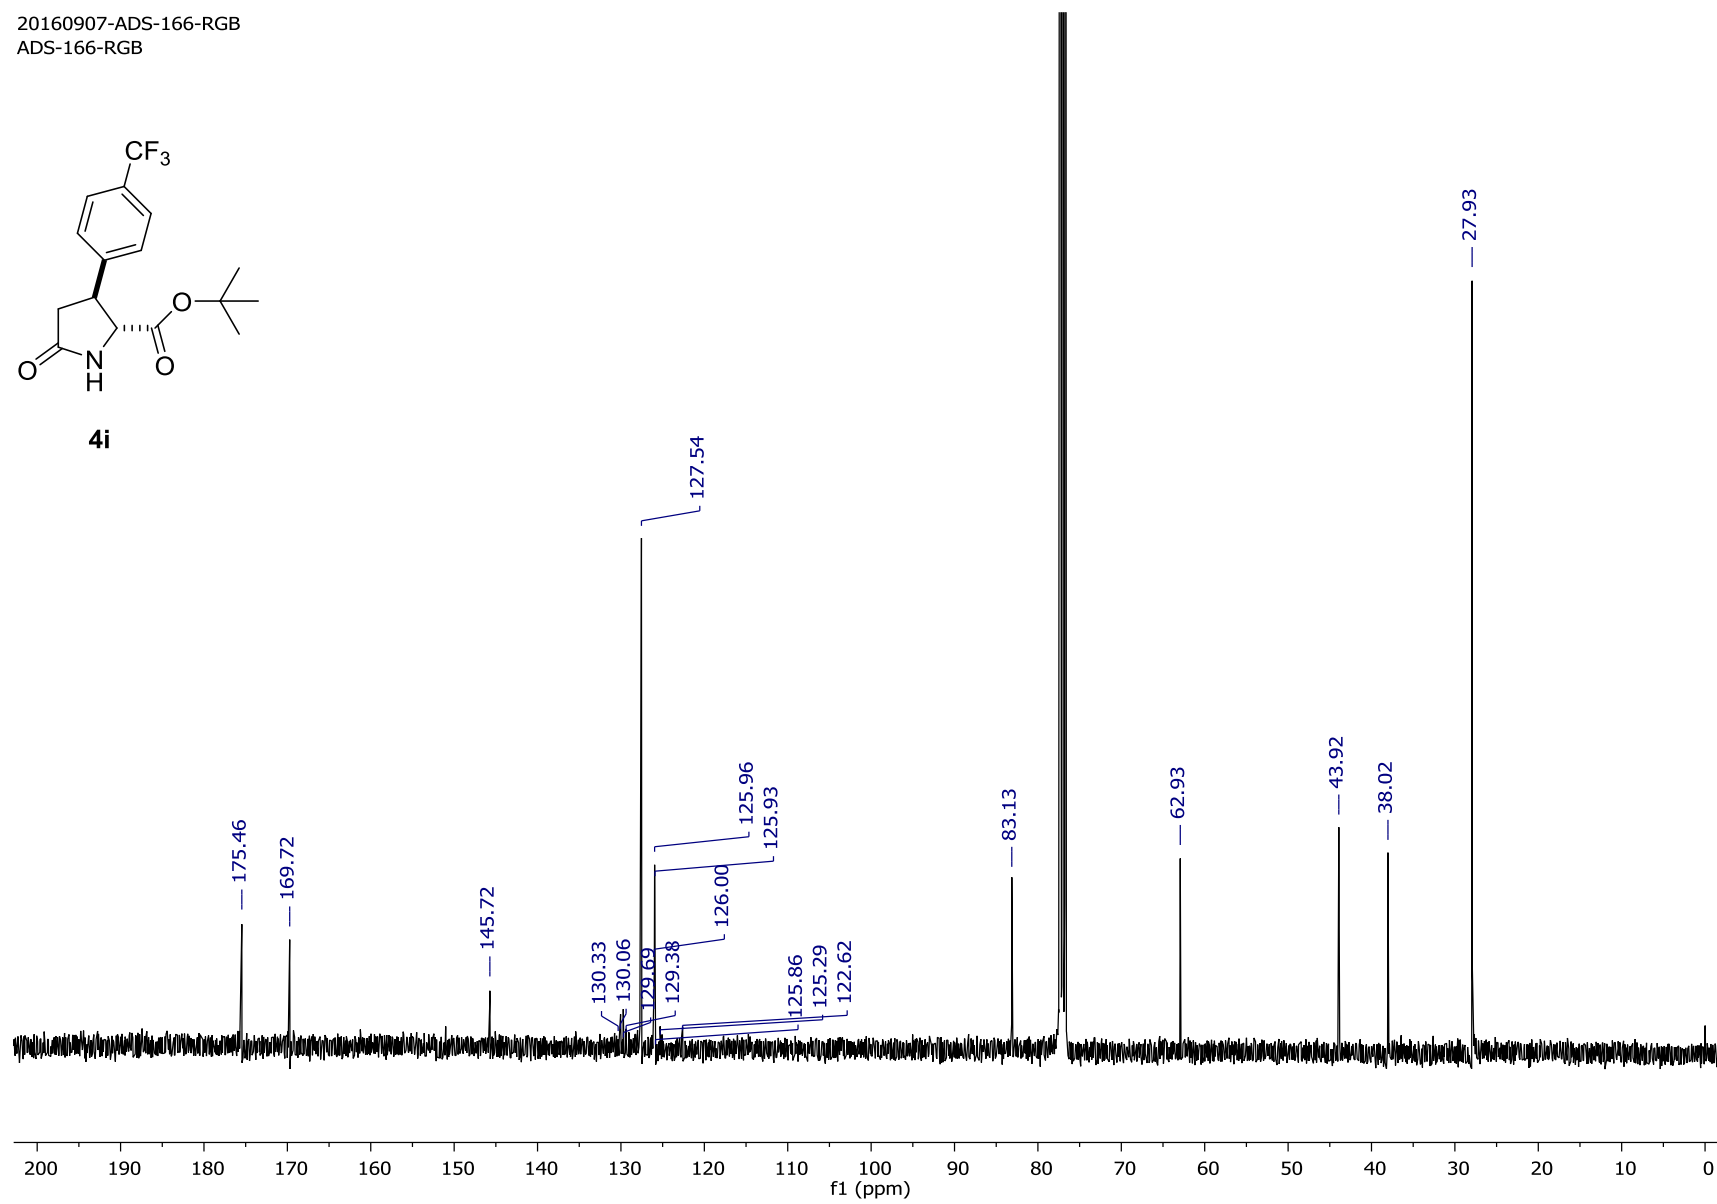

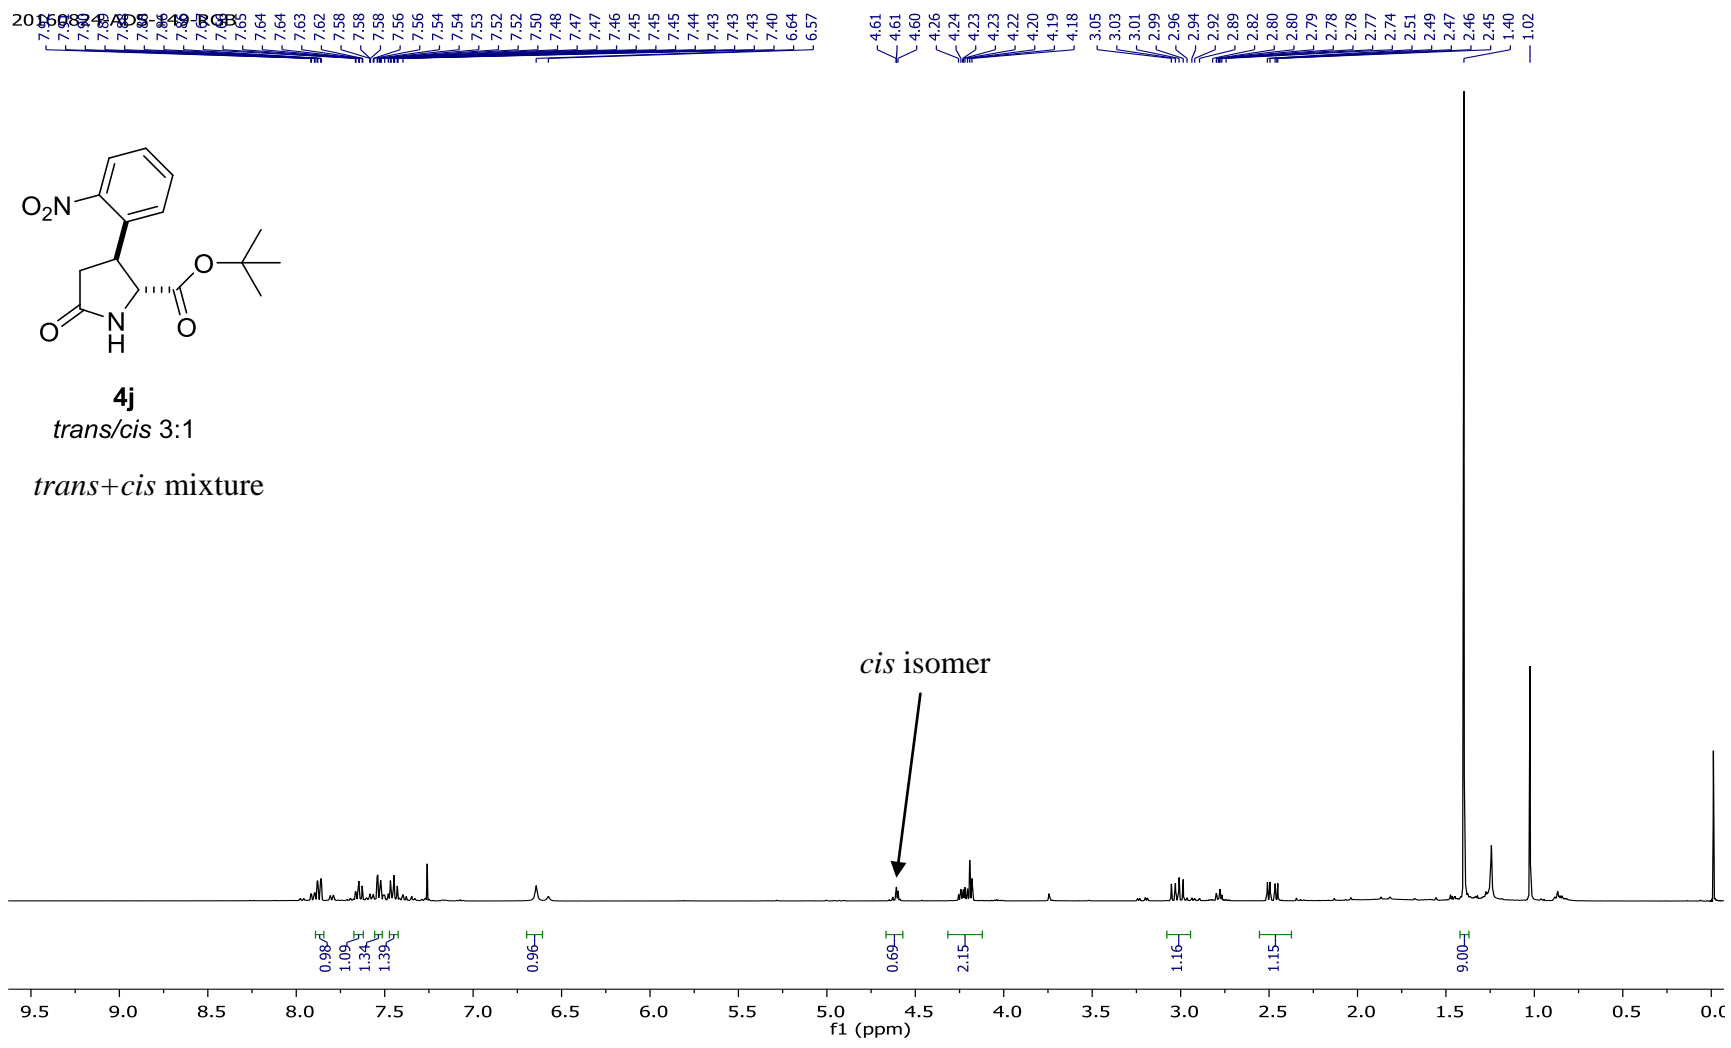

20160824-ADS-149-RGB

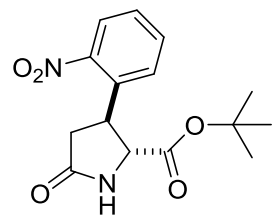

4j

*trans*+*cis* mixture

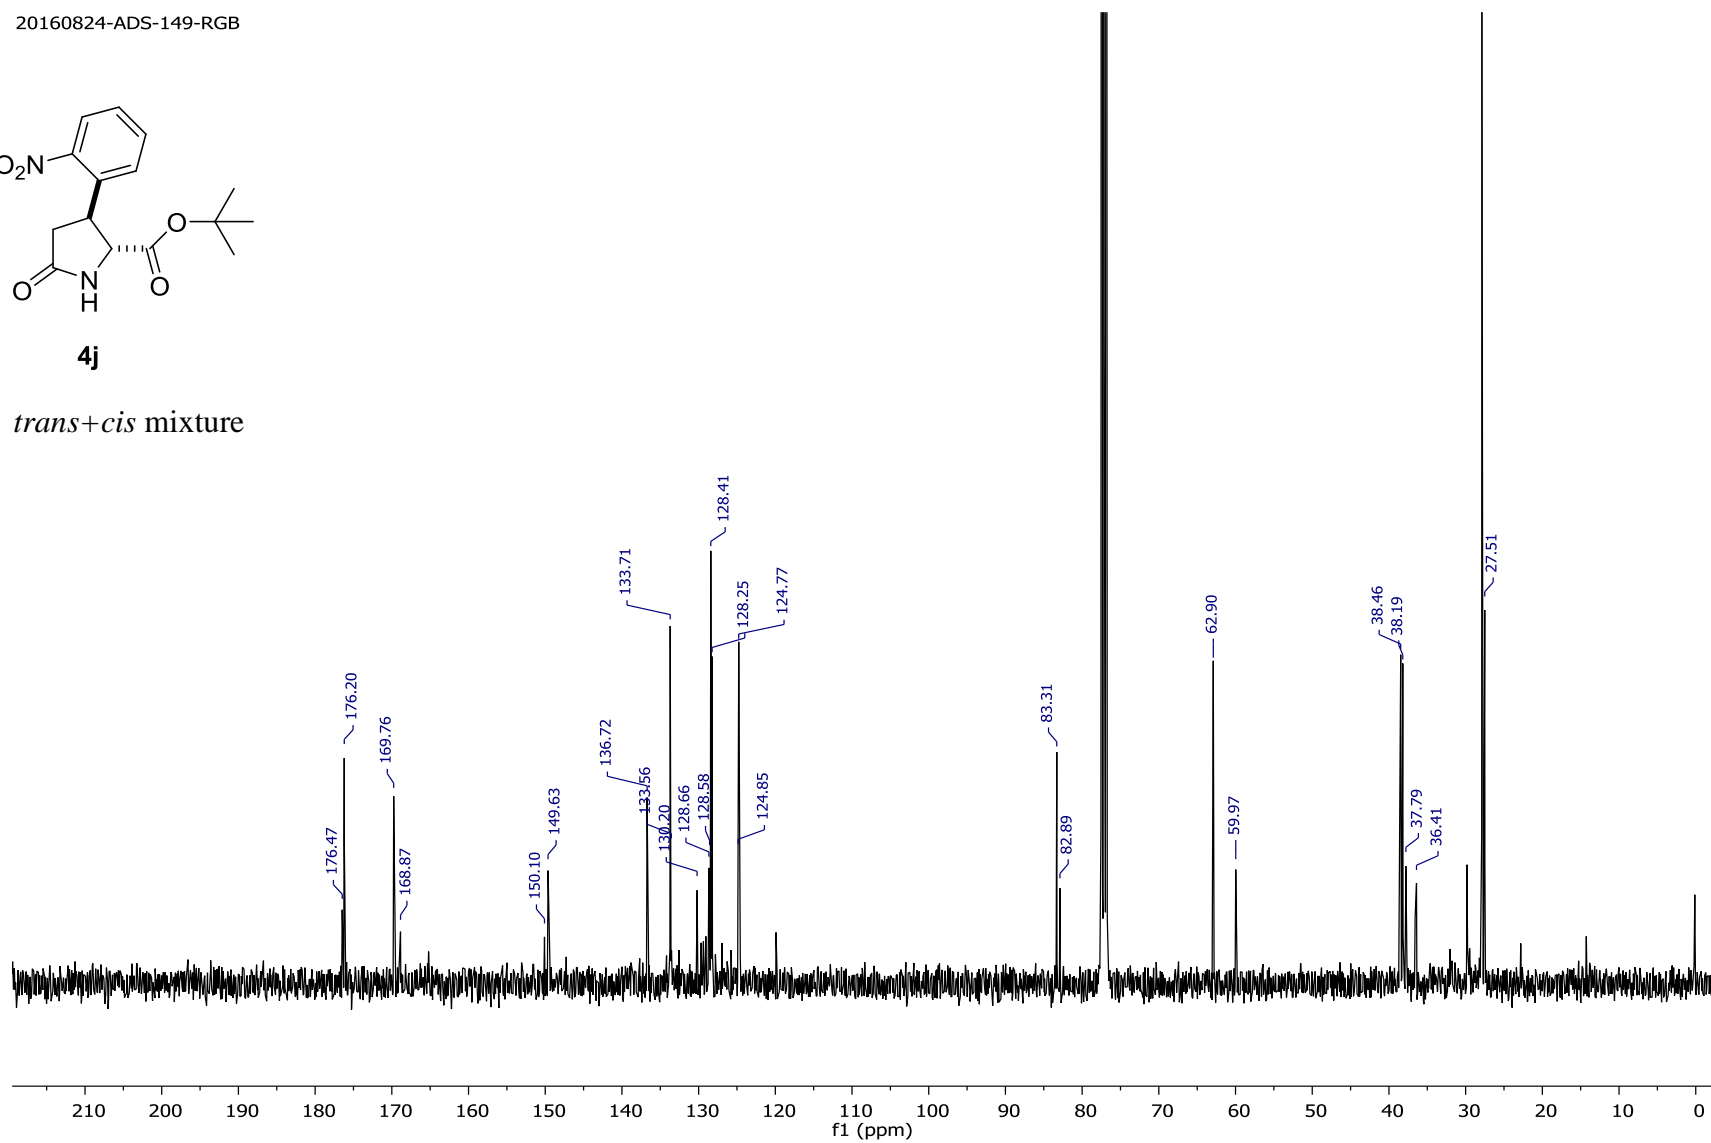

20160909 9:48:51.88  
 8.19 8.18 8.17 8.16 8.15 8.14 8.13 8.12 8.11 8.10 8.09 8.08 8.07 8.06 8.05 8.04 8.03 8.02 8.01 8.00 7.99 7.98 7.97 7.96 7.95 7.94 7.93 7.92 7.91 7.90 7.89 7.88 7.87 7.86 7.85 7.84 7.83 7.82 7.81 7.80 7.79 7.78 7.77 7.76 7.75 7.74 7.73 7.72 7.71 7.70 7.69 7.68 7.67 7.66 7.65 7.64 7.63 7.62 7.61 7.60 7.59 7.58 7.57 7.56 7.55 7.54 7.53 7.52 7.51 7.50 7.49 7.48 7.47 7.46 7.45 7.44 7.43 7.42 7.41 7.40 7.39 7.38 7.37 7.36 7.35 7.34 7.33 7.32 7.31 7.30 7.29 7.28 7.27 7.26 7.25 7.24 7.23 7.22 7.21 7.20 7.19 7.18 7.17 7.16 7.15 7.14 7.13 7.12 7.11 7.10 7.09 7.08 7.07 7.06 7.05 7.04 7.03 7.02 7.01 7.00 6.99 6.98 6.97 6.96 6.95 6.94 6.93 6.92 6.91 6.90 6.89 6.88 6.87 6.86 6.85 6.84 6.83 6.82 6.81 6.80 6.79 6.78 6.77 6.76 6.75 6.74 6.73 6.72 6.71 6.70 6.69 6.68 6.67 6.66 6.65 6.64 6.63 6.62 6.61 6.60 6.59 6.58 6.57 6.56 6.55 6.54 6.53 6.52 6.51 6.50 6.49 6.48 6.47 6.46 6.45 6.44 6.43 6.42 6.41 6.40 6.39 6.38 6.37 6.36 6.35 6.34 6.33 6.32 6.31 6.30 6.29 6.28 6.27 6.26 6.25 6.24 6.23 6.22 6.21 6.20 6.19 6.18 6.17 6.16 6.15 6.14 6.13 6.12 6.11 6.10 6.09 6.08 6.07 6.06 6.05 6.04 6.03 6.02 6.01 6.00 5.99 5.98 5.97 5.96 5.95 5.94 5.93 5.92 5.91 5.90 5.89 5.88 5.87 5.86 5.85 5.84 5.83 5.82 5.81 5.80 5.79 5.78 5.77 5.76 5.75 5.74 5.73 5.72 5.71 5.70 5.69 5.68 5.67 5.66 5.65 5.64 5.63 5.62 5.61 5.60 5.59 5.58 5.57 5.56 5.55 5.54 5.53 5.52 5.51 5.50 5.49 5.48 5.47 5.46 5.45 5.44 5.43 5.42 5.41 5.40 5.39 5.38 5.37 5.36 5.35 5.34 5.33 5.32 5.31 5.30 5.29 5.28 5.27 5.26 5.25 5.24 5.23 5.22 5.21 5.20 5.19 5.18 5.17 5.16 5.15 5.14 5.13 5.12 5.11 5.10 5.09 5.08 5.07 5.06 5.05 5.04 5.03 5.02 5.01 5.00 4.99 4.98 4.97 4.96 4.95 4.94 4.93 4.92 4.91 4.90 4.89 4.88 4.87 4.86 4.85 4.84 4.83 4.82 4.81 4.80 4.79 4.78 4.77 4.76 4.75 4.74 4.73 4.72 4.71 4.70 4.69 4.68 4.67 4.66 4.65 4.64 4.63 4.62 4.61 4.60 4.59 4.58 4.57 4.56 4.55 4.54 4.53 4.52 4.51 4.50 4.49 4.48 4.47 4.46 4.45 4.44 4.43 4.42 4.41 4.40 4.39 4.38 4.37 4.36 4.35 4.34 4.33 4.32 4.31 4.30 4.29 4.28 4.27 4.26 4.25 4.24 4.23 4.22 4.21 4.20 4.19 4.18 4.17 4.16 4.15 4.14 4.13 4.12 4.11 4.10 4.09 4.08 4.07 4.06 4.05 4.04 4.03 4.02 4.01 4.00 3.99 3.98 3.97 3.96 3.95 3.94 3.93 3.92 3.91 3.90 3.89 3.88 3.87 3.86 3.85 3.84 3.83 3.82 3.81 3.80 3.79 3.78 3.77 3.76 3.75 3.74 3.73 3.72 3.71 3.70 3.69 3.68 3.67 3.66 3.65 3.64 3.63 3.62 3.61 3.60 3.59 3.58 3.57 3.56 3.55 3.54 3.53 3.52 3.51 3.50 3.49 3.48 3.47 3.46 3.45 3.44 3.43 3.42 3.41 3.40 3.39 3.38 3.37 3.36 3.35 3.34 3.33 3.32 3.31 3.30 3.29 3.28 3.27 3.26 3.25 3.24 3.23 3.22 3.21 3.20 3.19 3.18 3.17 3.16 3.15 3.14 3.13 3.12 3.11 3.10 3.09 3.08 3.07 3.06 3.05 3.04 3.03 3.02 3.01 3.00 2.99 2.98 2.97 2.96 2.95 2.94 2.93 2.92 2.91 2.90 2.89 2.88 2.87 2.86 2.85 2.84 2.83 2.82 2.81 2.80 2.79 2.78 2.77 2.76 2.75 2.74 2.73 2.72 2.71 2.70 2.69 2.68 2.67 2.66 2.65 2.64 2.63 2.62 2.61 2.60 2.59 2.58 2.57 2.56 2.55 2.54 2.53 2.52 2.51 2.50 2.49 2.48 2.47 2.46 2.45 2.44 2.43 2.42 2.41 2.40 2.39 2.38 2.37 2.36 2.35 2.34 2.33 2.32 2.31 2.30 2.29 2.28 2.27 2.26 2.25 2.24 2.23 2.22 2.21 2.20 2.19 2.18 2.17 2.16 2.15 2.14 2.13 2.12 2.11 2.10 2.09 2.08 2.07 2.06 2.05 2.04 2.03 2.02 2.01 2.00 1.99 1.98 1.97 1.96 1.95 1.94 1.93 1.92 1.91 1.90 1.89 1.88 1.87 1.86 1.85 1.84 1.83 1.82 1.81 1.80 1.79 1.78 1.77 1.76 1.75 1.74 1.73 1.72 1.71 1.70 1.69 1.68 1.67 1.66 1.65 1.64 1.63 1.62 1.61 1.60 1.59 1.58 1.57 1.56 1.55 1.54 1.53 1.52 1.51 1.50 1.49 1.48 1.47 1.46 1.45 1.44 1.43 1.42 1.41 1.40 1.39 1.38 1.37 1.36 1.35 1.34 1.33 1.32 1.31 1.30 1.29 1.28 1.27 1.26 1.25 1.24 1.23 1.22 1.21 1.20 1.19 1.18 1.17 1.16 1.15 1.14 1.13 1.12 1.11 1.10 1.09 1.08 1.07 1.06 1.05 1.04 1.03 1.02 1.01 1.00 0.99 0.98 0.97 0.96 0.95 0.94 0.93 0.92 0.91 0.90 0.89 0.88 0.87 0.86 0.85 0.84 0.83 0.82 0.81 0.80 0.79 0.78 0.77 0.76 0.75 0.74 0.73 0.72 0.71 0.70 0.69 0.68 0.67 0.66 0.65 0.64 0.63 0.62 0.61 0.60 0.59 0.58 0.57 0.56 0.55 0.54 0.53 0.52 0.51 0.50 0.49 0.48 0.47 0.46 0.45 0.44 0.43 0.42 0.41 0.40 0.39 0.38 0.37 0.36 0.35 0.34 0.33 0.32 0.31 0.30 0.29 0.28 0.27 0.26 0.25 0.24 0.23 0.22 0.21 0.20 0.19 0.18 0.17 0.16 0.15 0.14 0.13 0.12 0.11 0.10 0.09 0.08 0.07 0.06 0.05 0.04 0.03 0.02 0.01 0.00

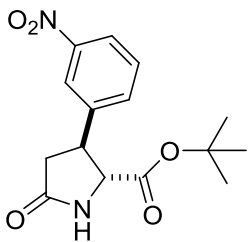

**4k**  
*trans/cis* 9:1  
*trans+cis* mixture

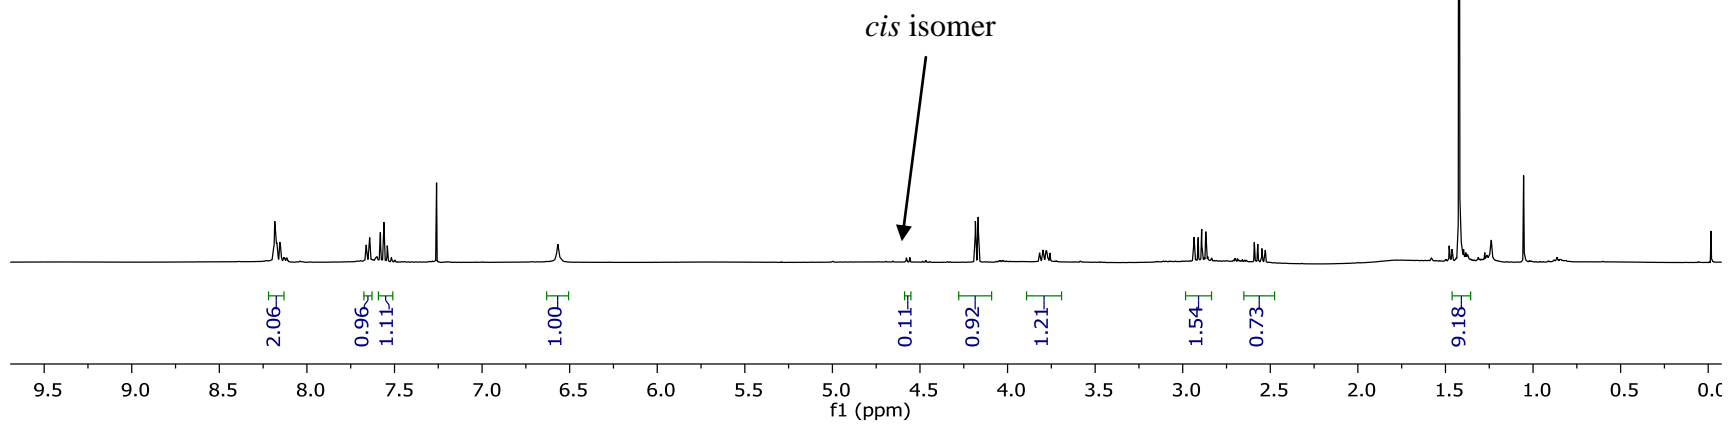

20160919-ADS-180-RGB

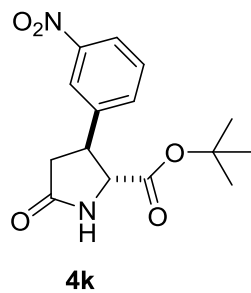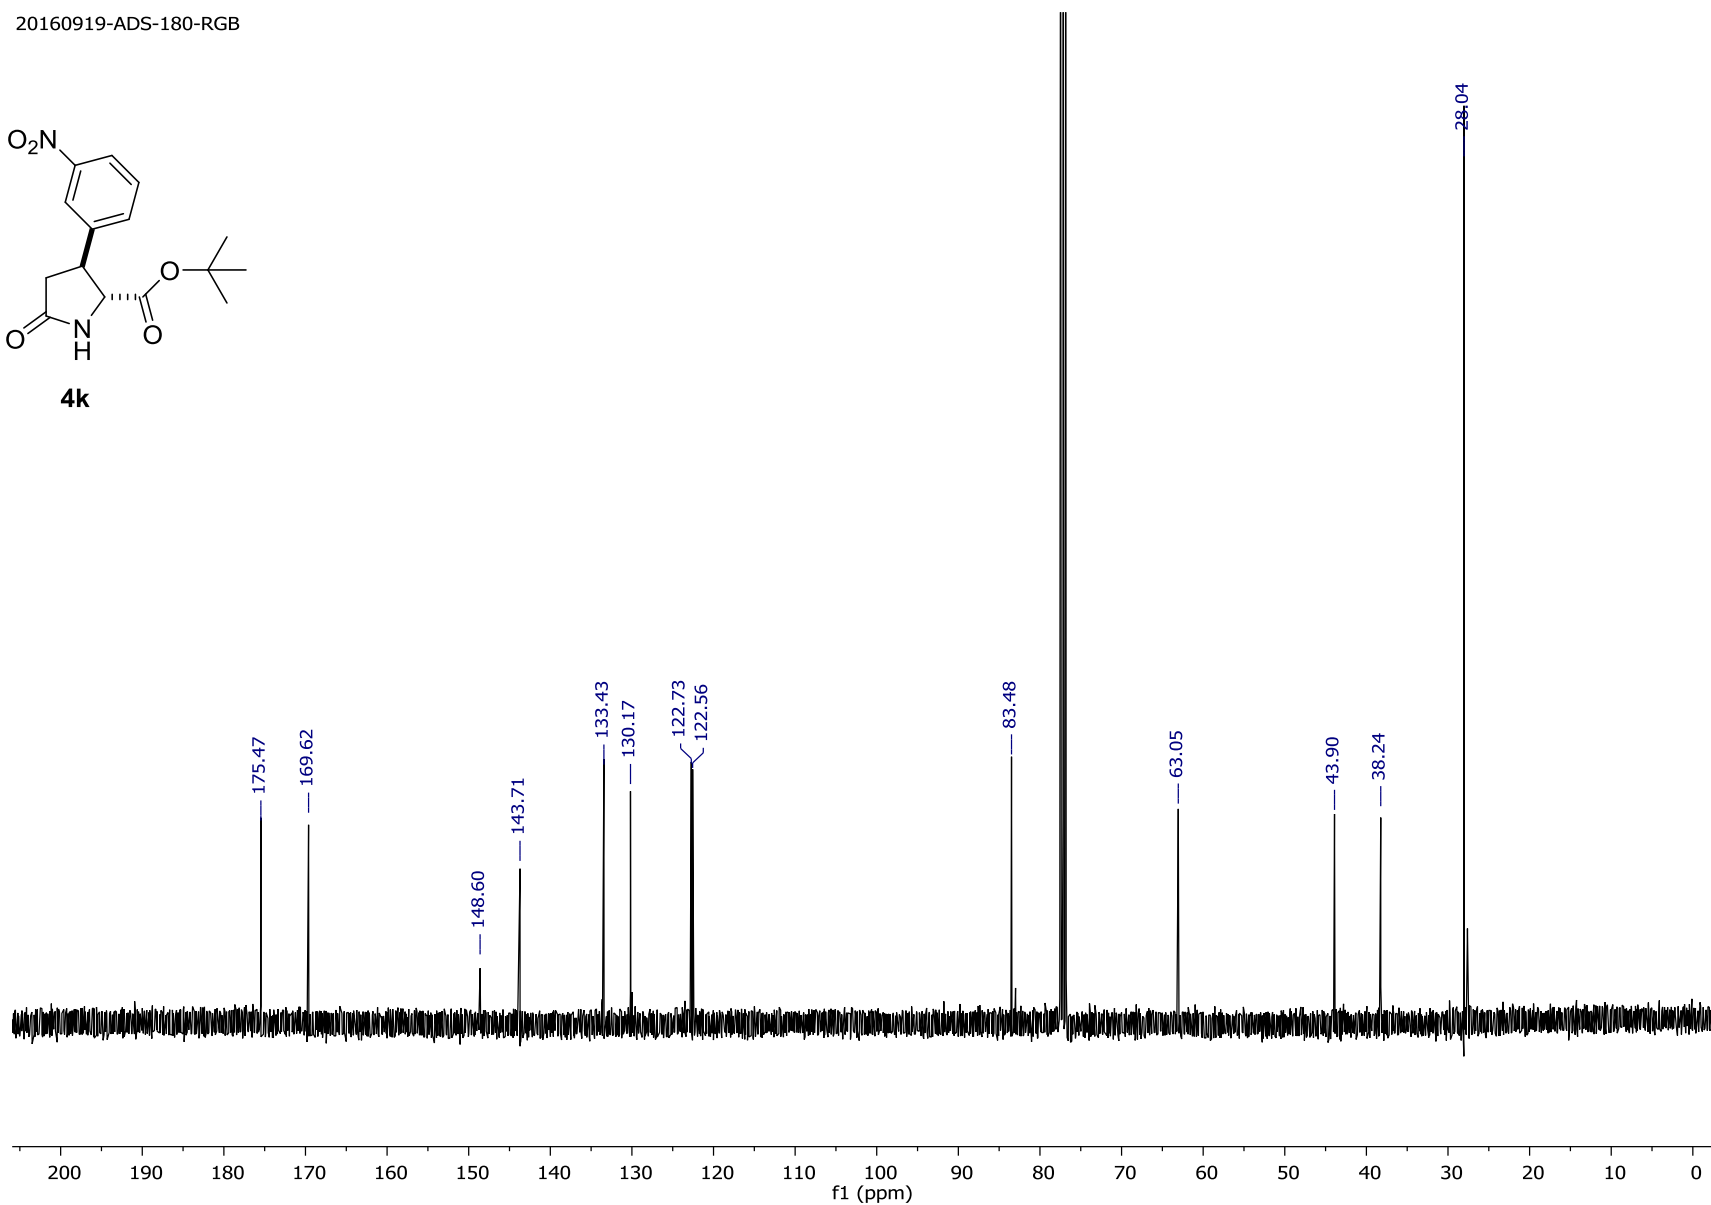

20160831-ADS-161-RGB  
ADS-161-RGB

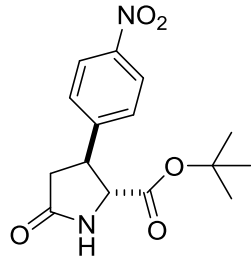

**4I**  
*trans/cis* >20:1

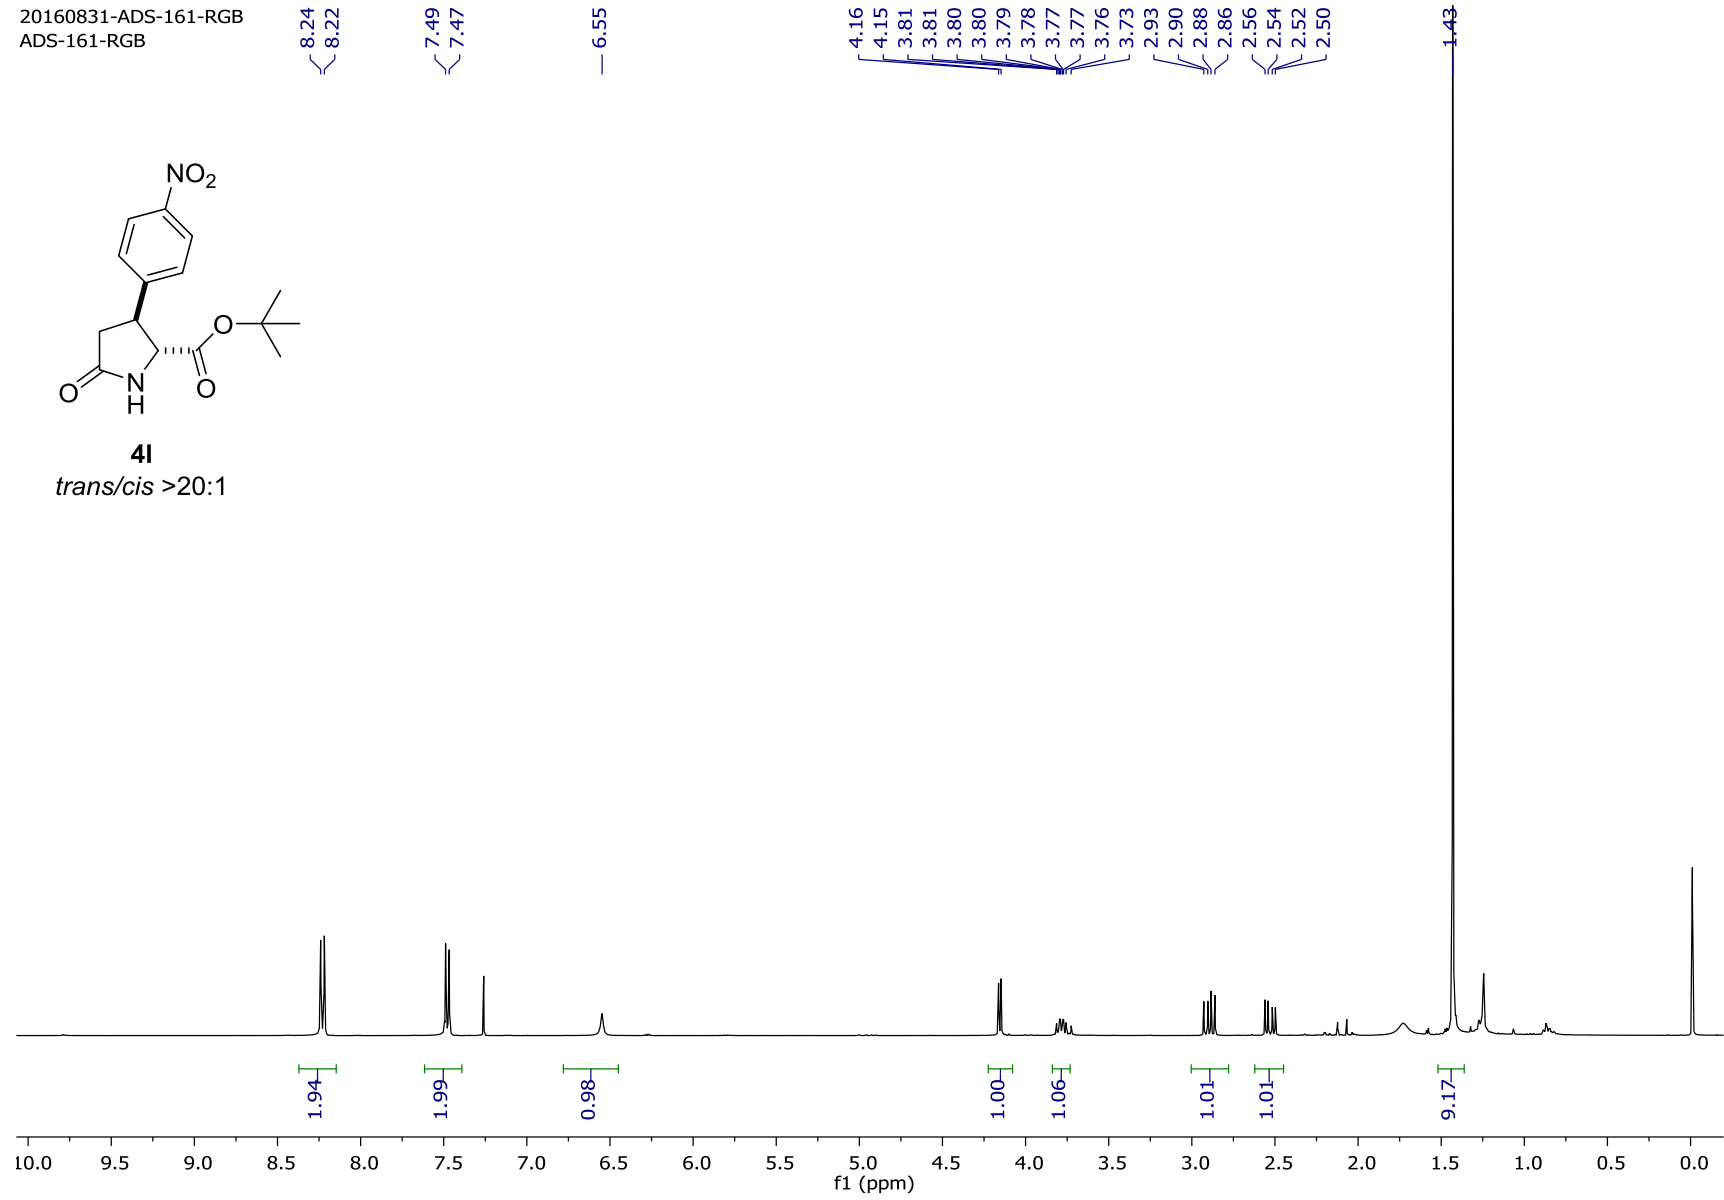



20160831-ADS-161-RGB  
ADS-161-RGB

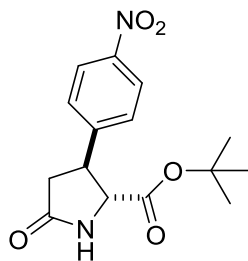

4I

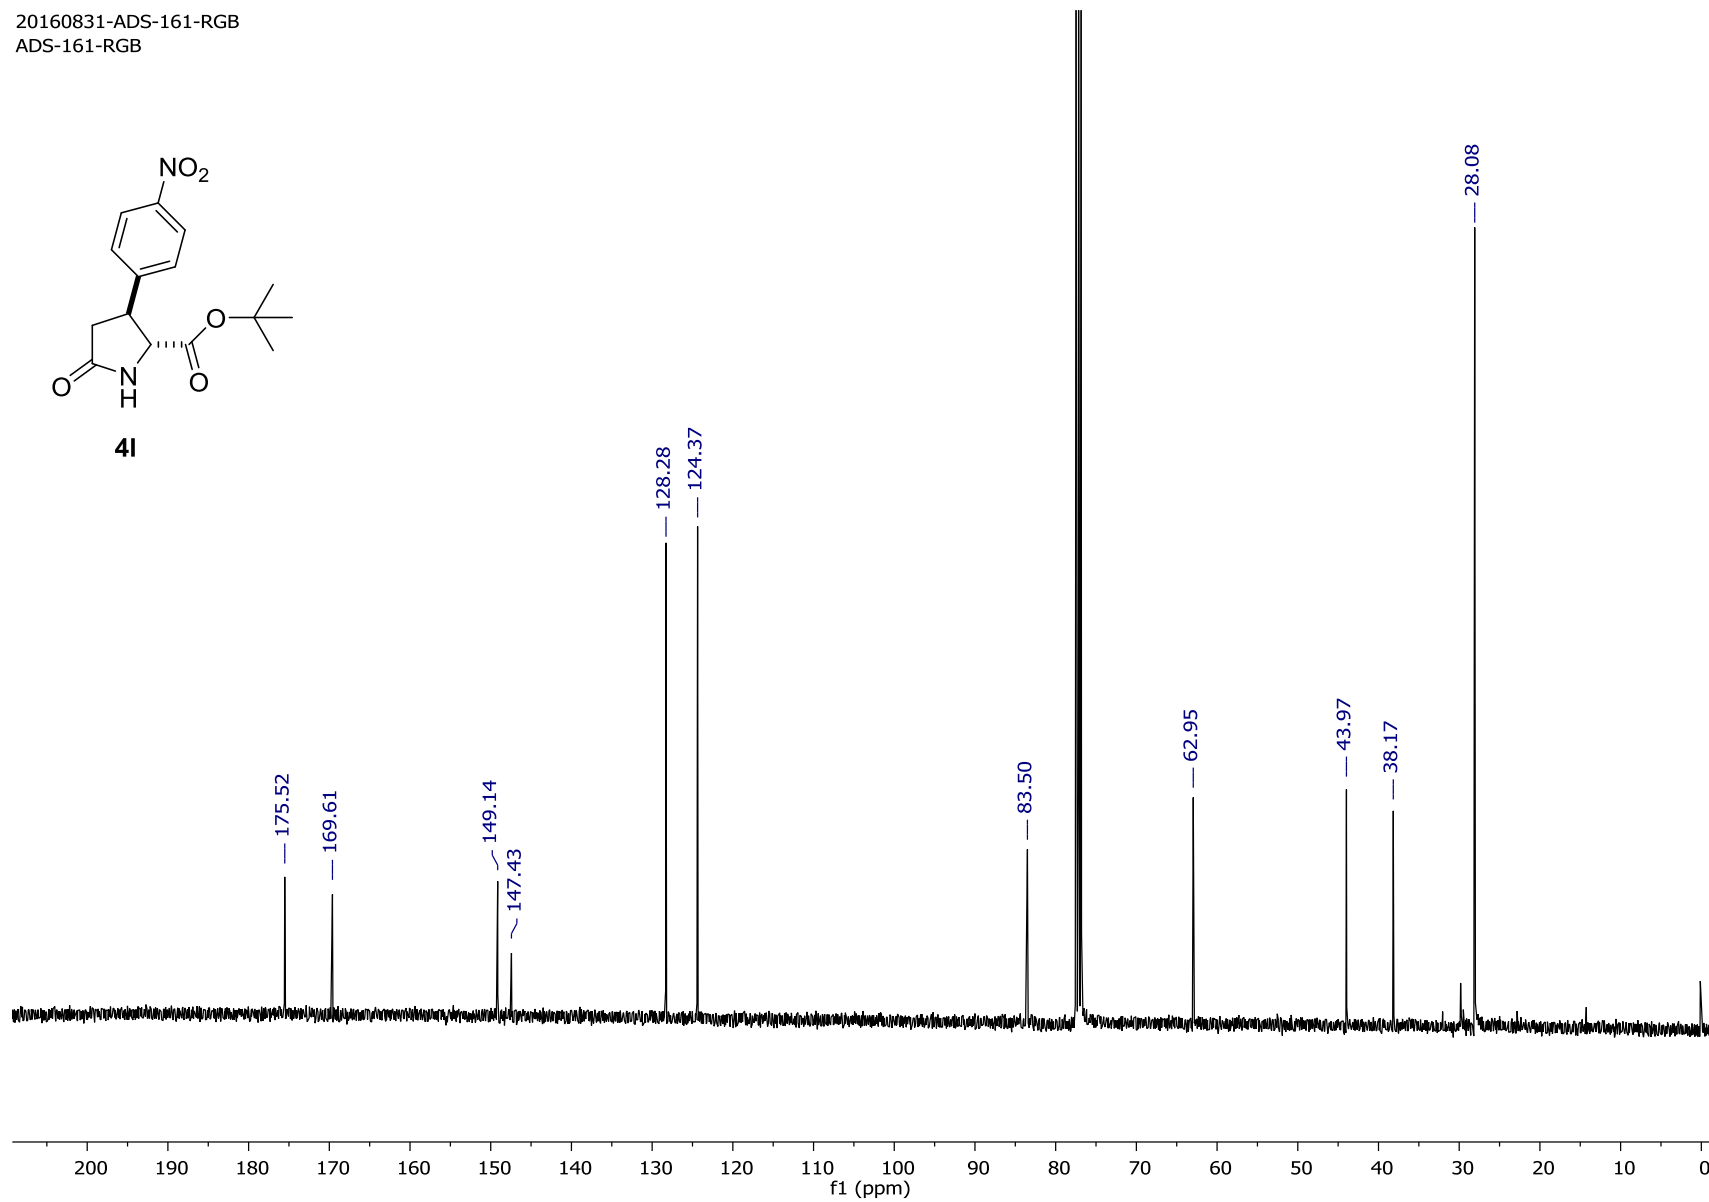

20161024-ADS-1888-RGB  
ADS-1888-RGB

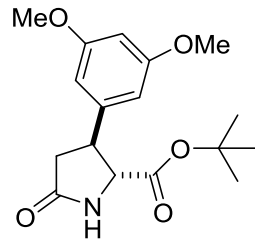

**4m**  
*trans/cis* >20:1

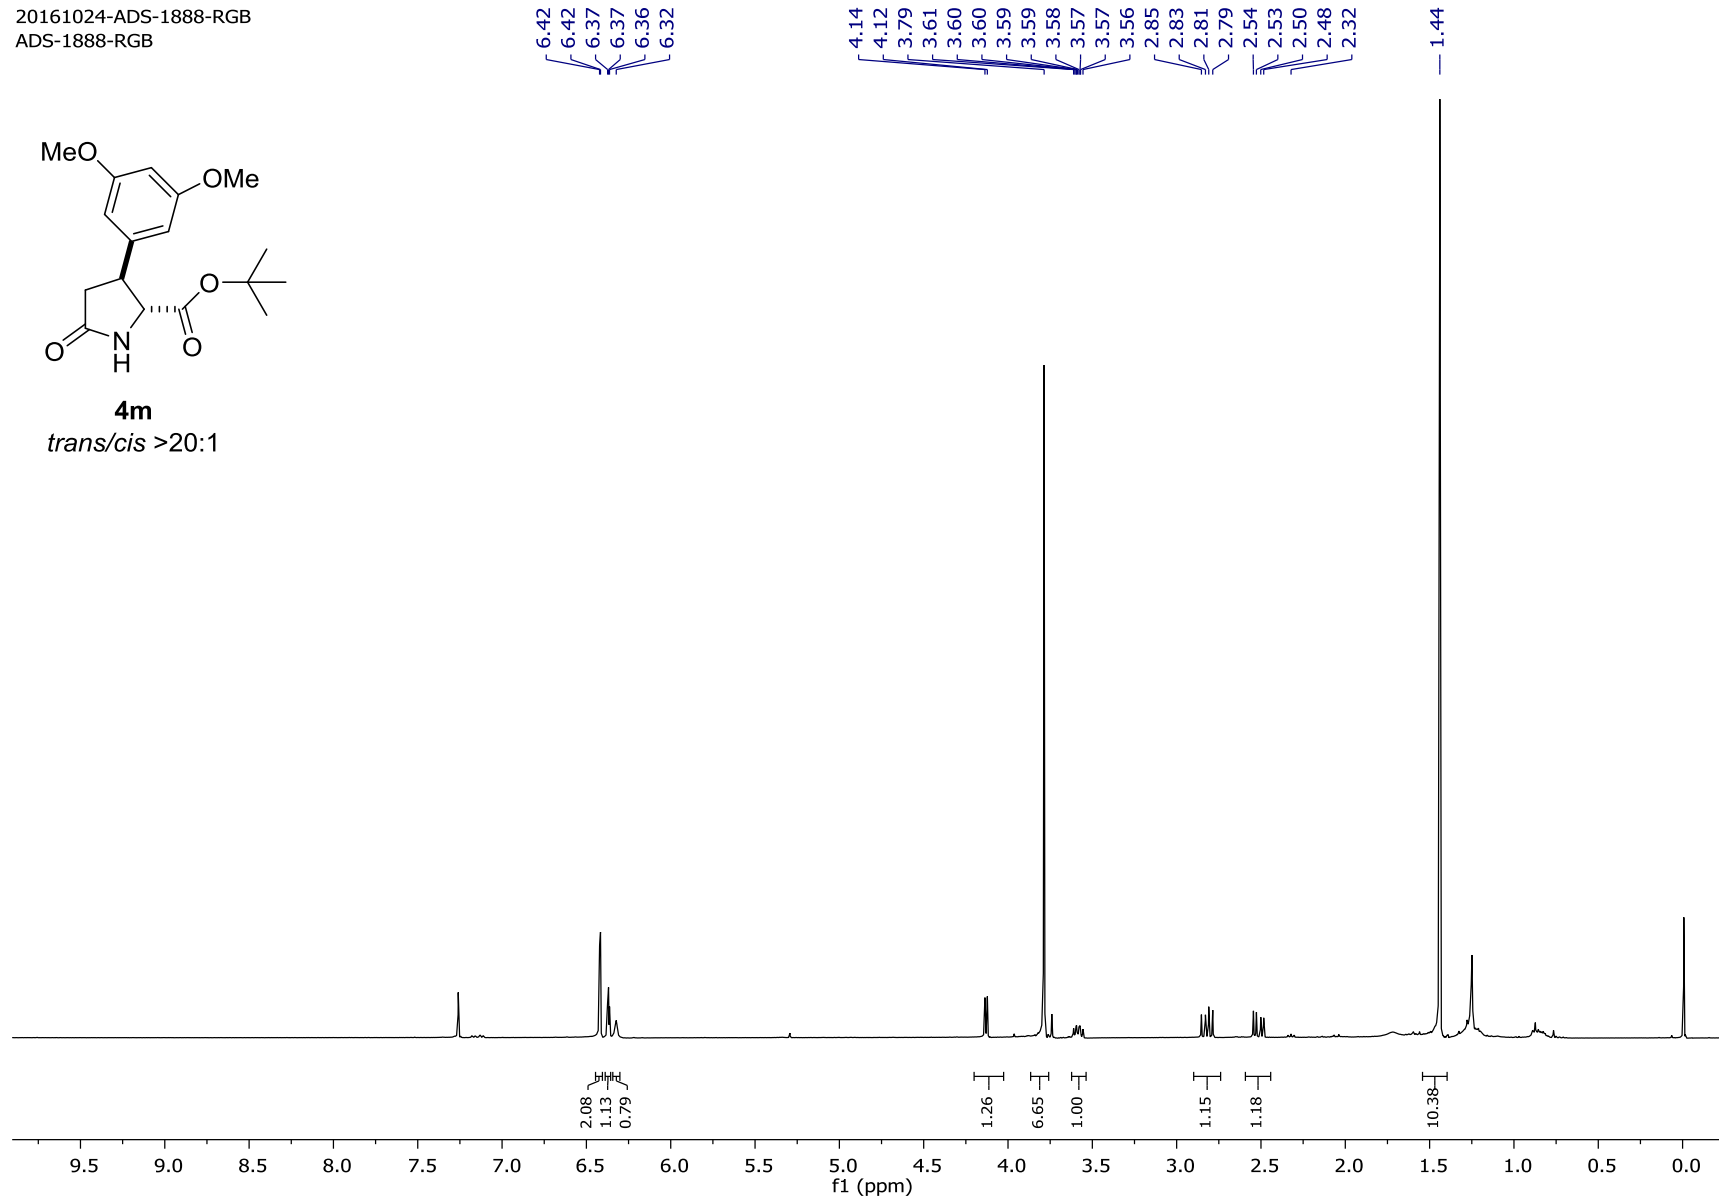

20161024-ADS-1888-RGB  
ADS-1888-RGB

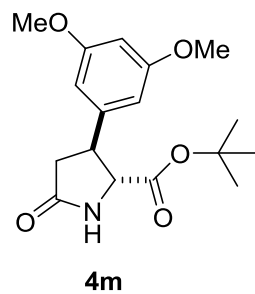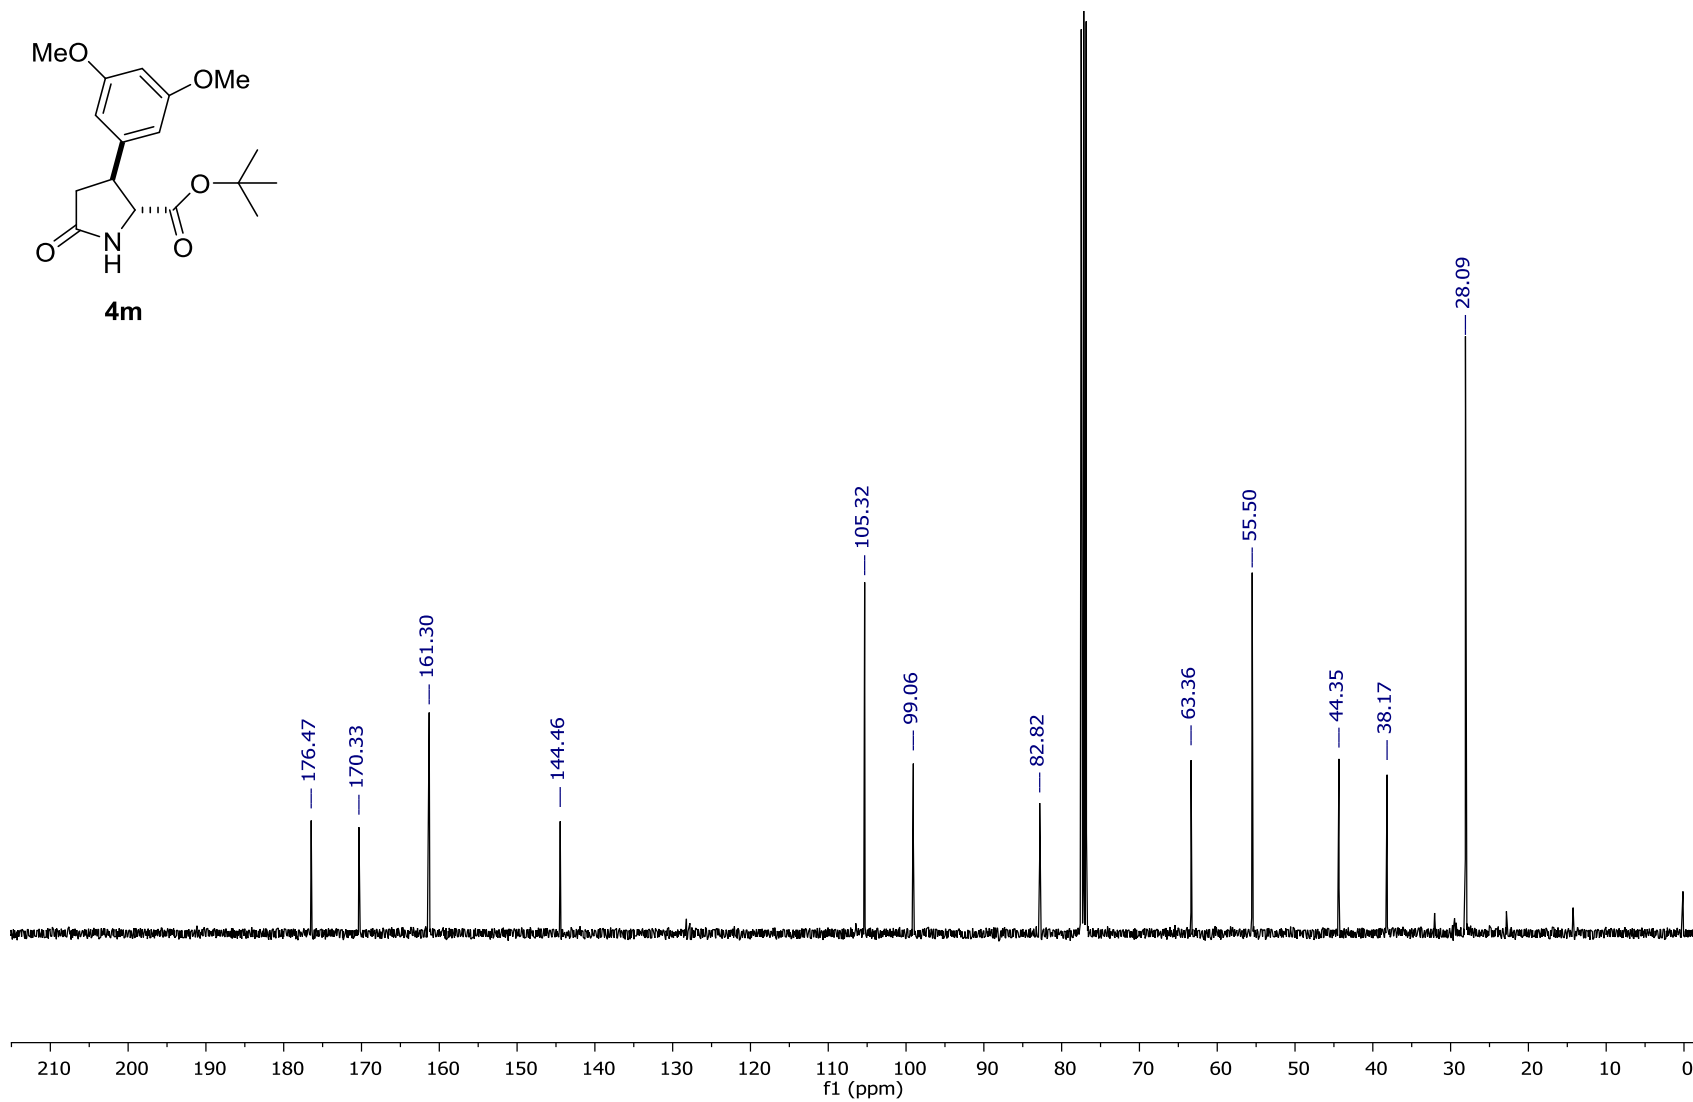

20160910-ADS-171-RGB

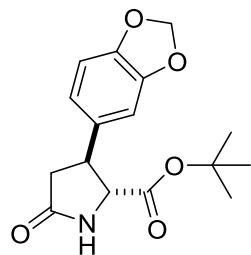

**4n**

*trans/cis* 5:1

*trans+cis* mixture

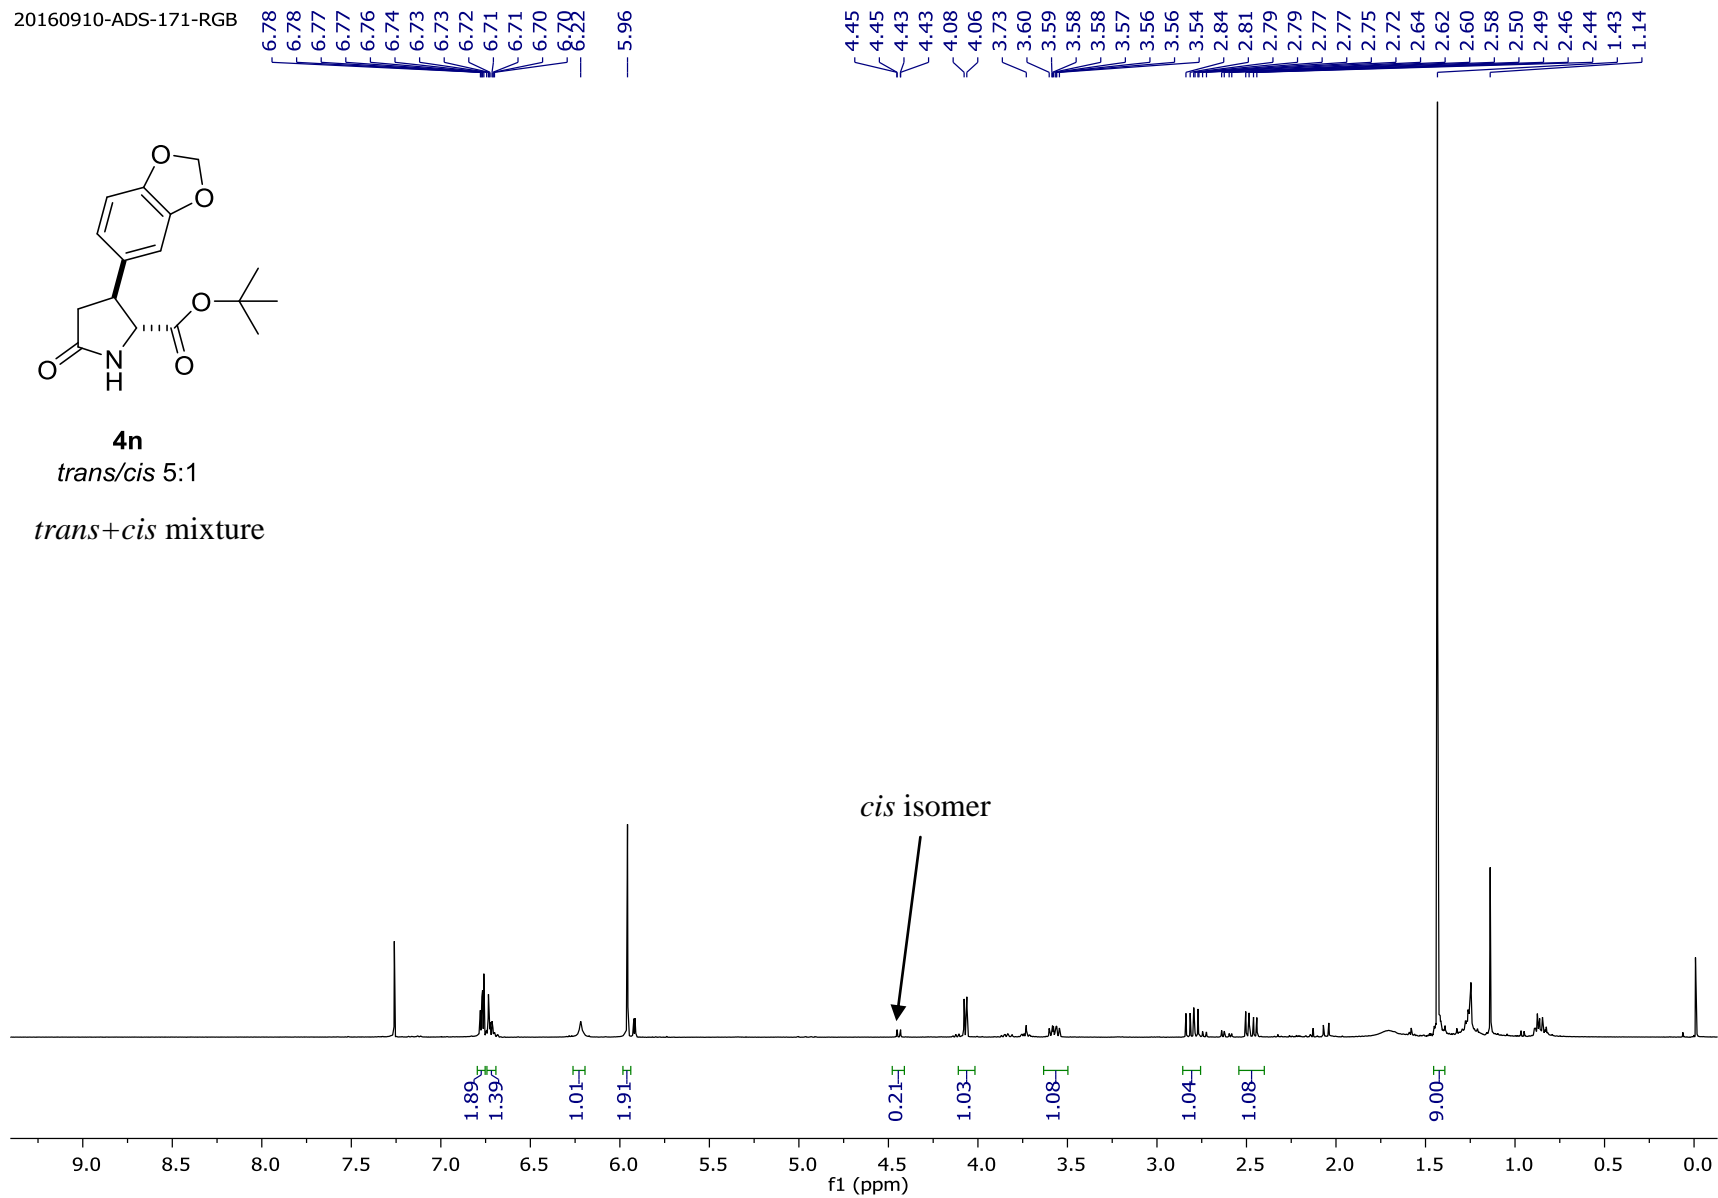

20160910-ADS-171-RGB

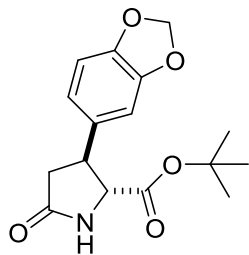

**4n**

*trans+cis* mixture

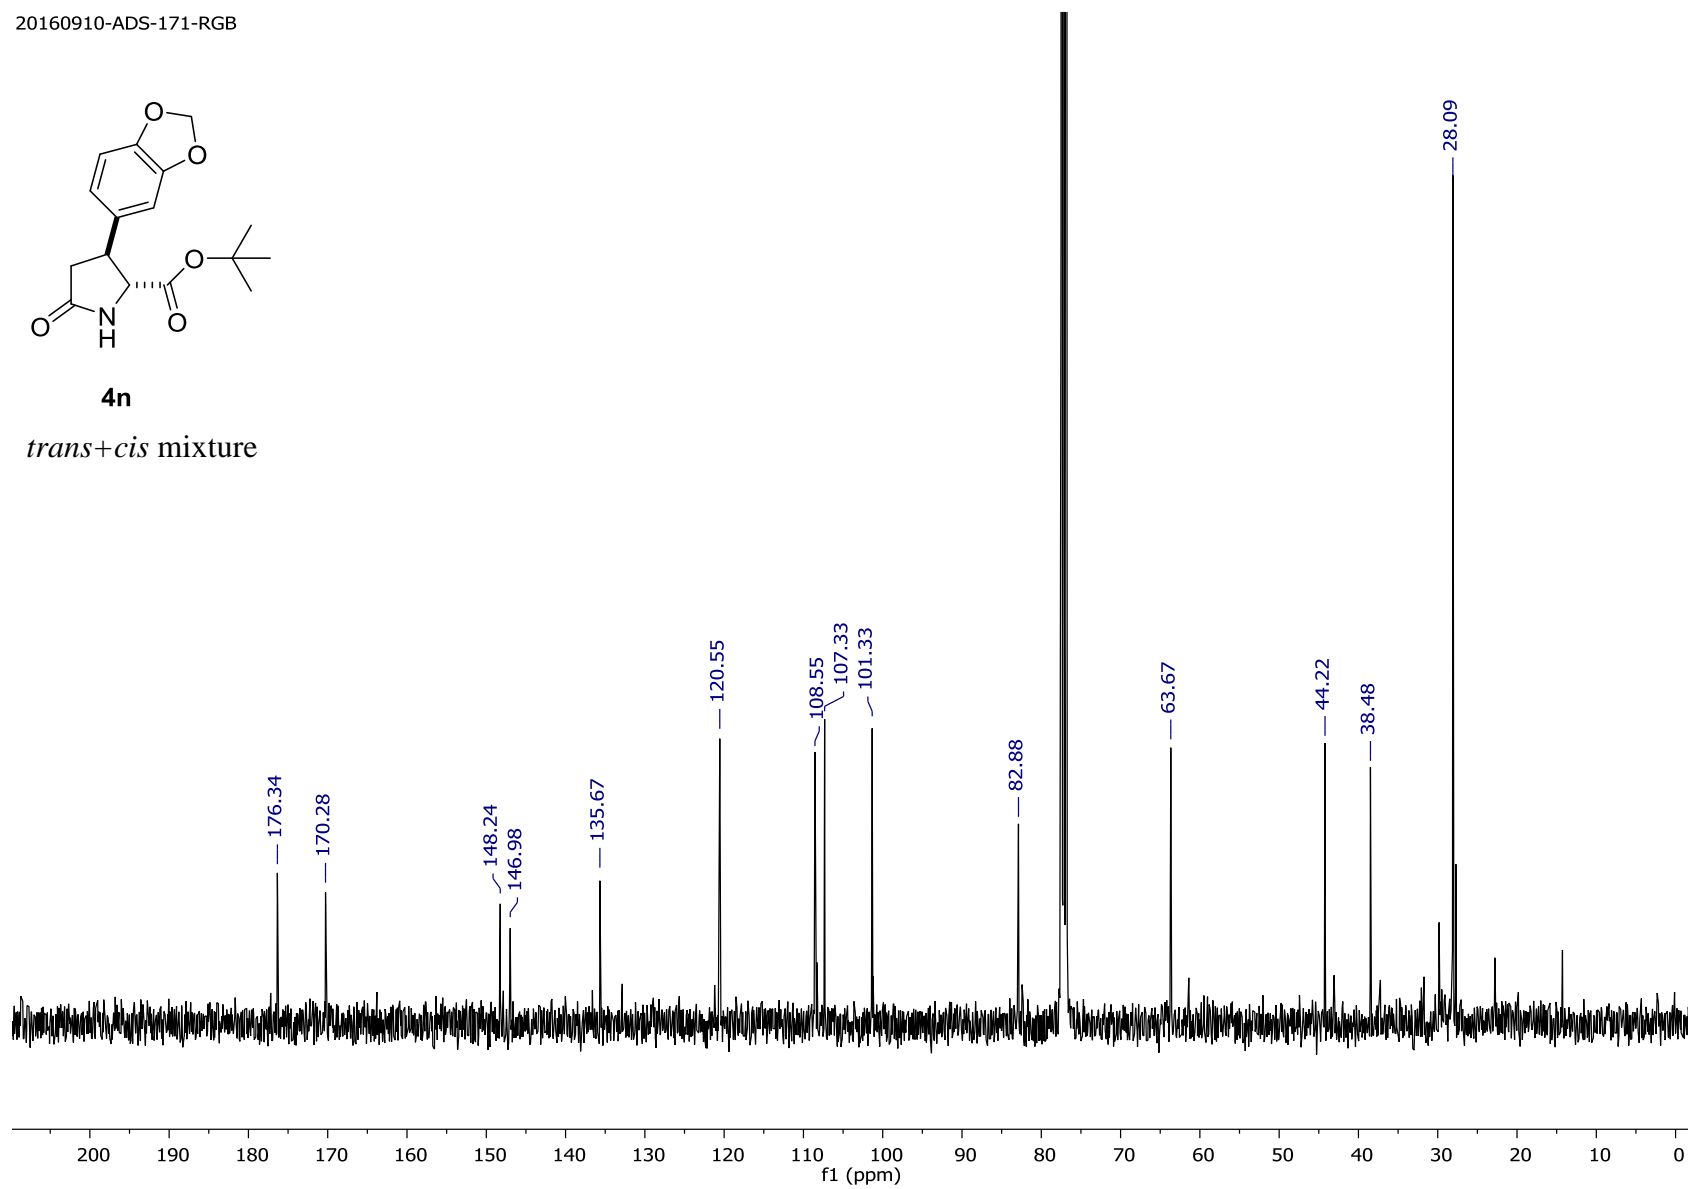

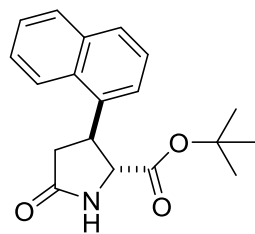

**4o**

*trans/cis* 3:1

*trans+cis* mixture

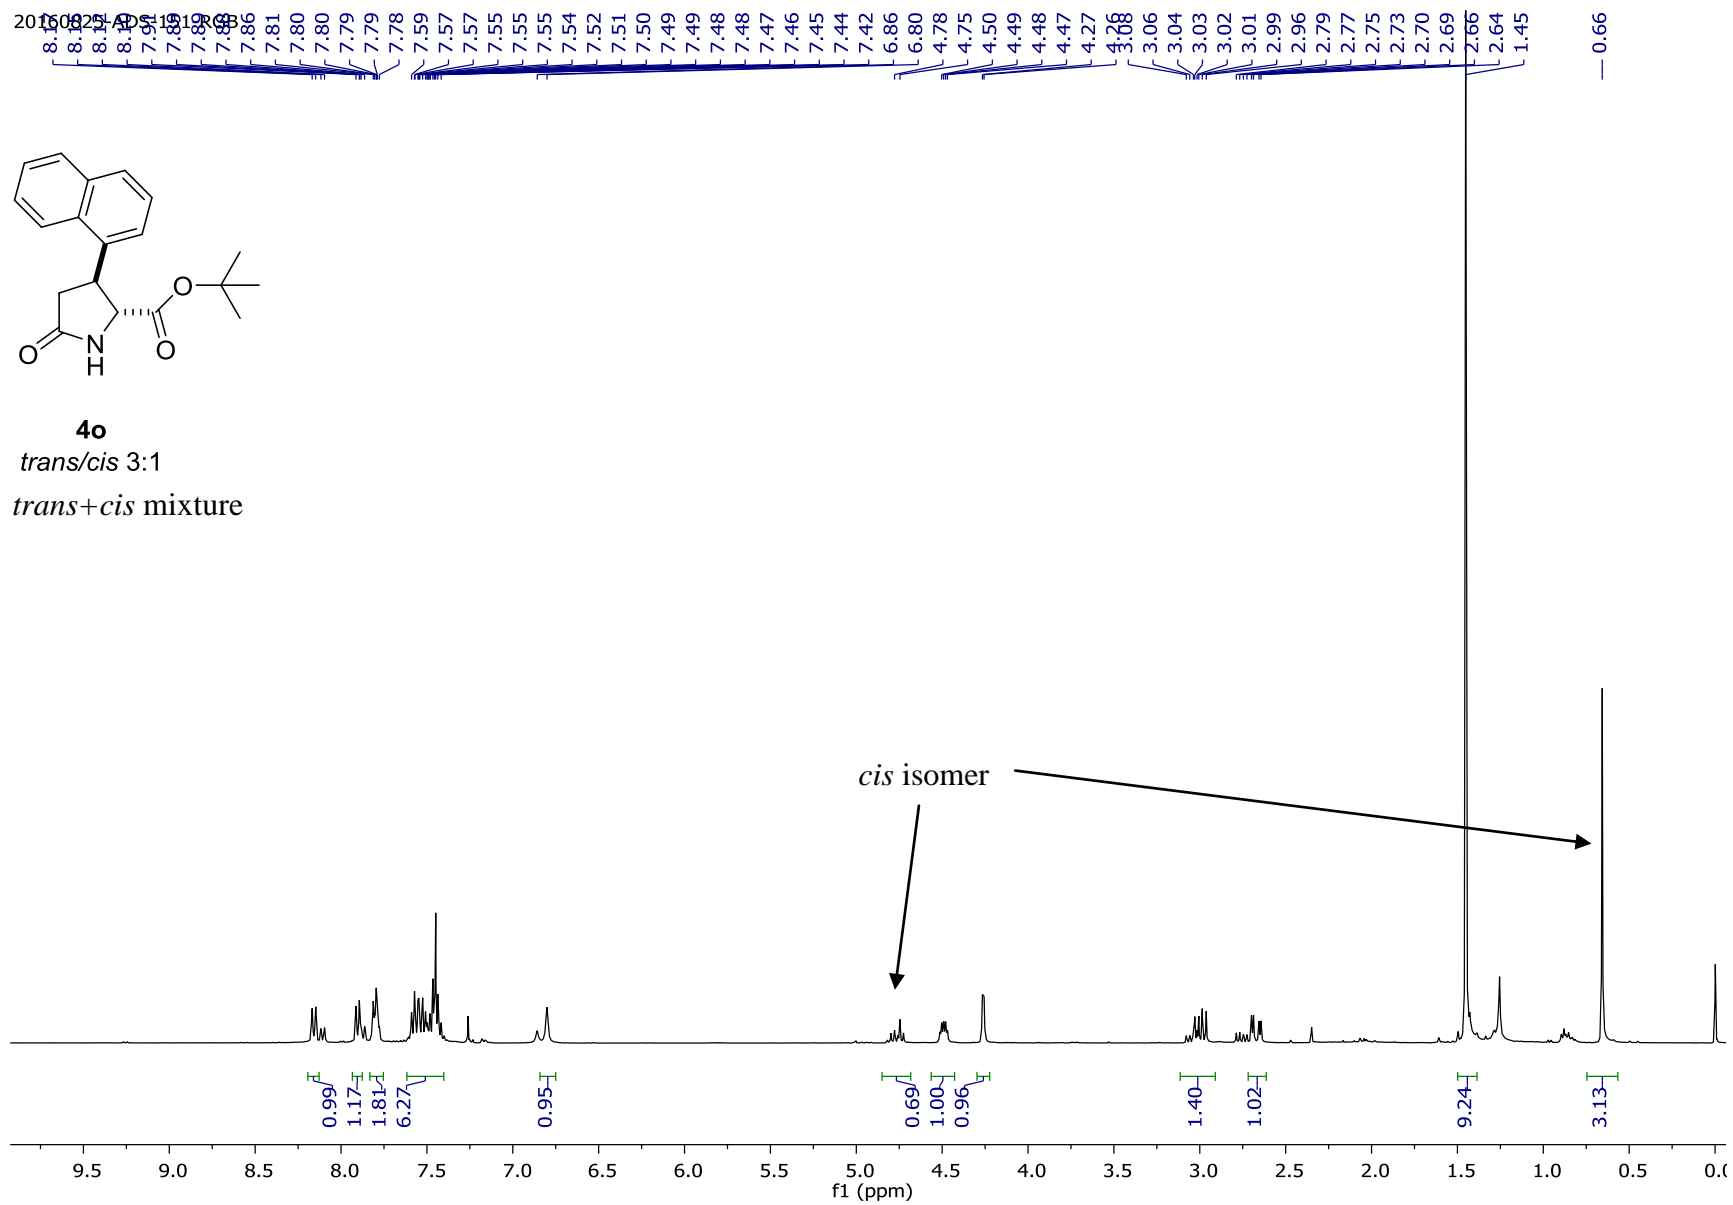

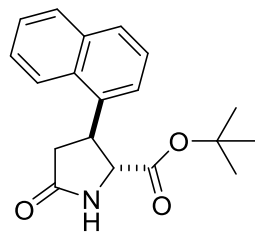

**4o**  
*trans+cis* mixture

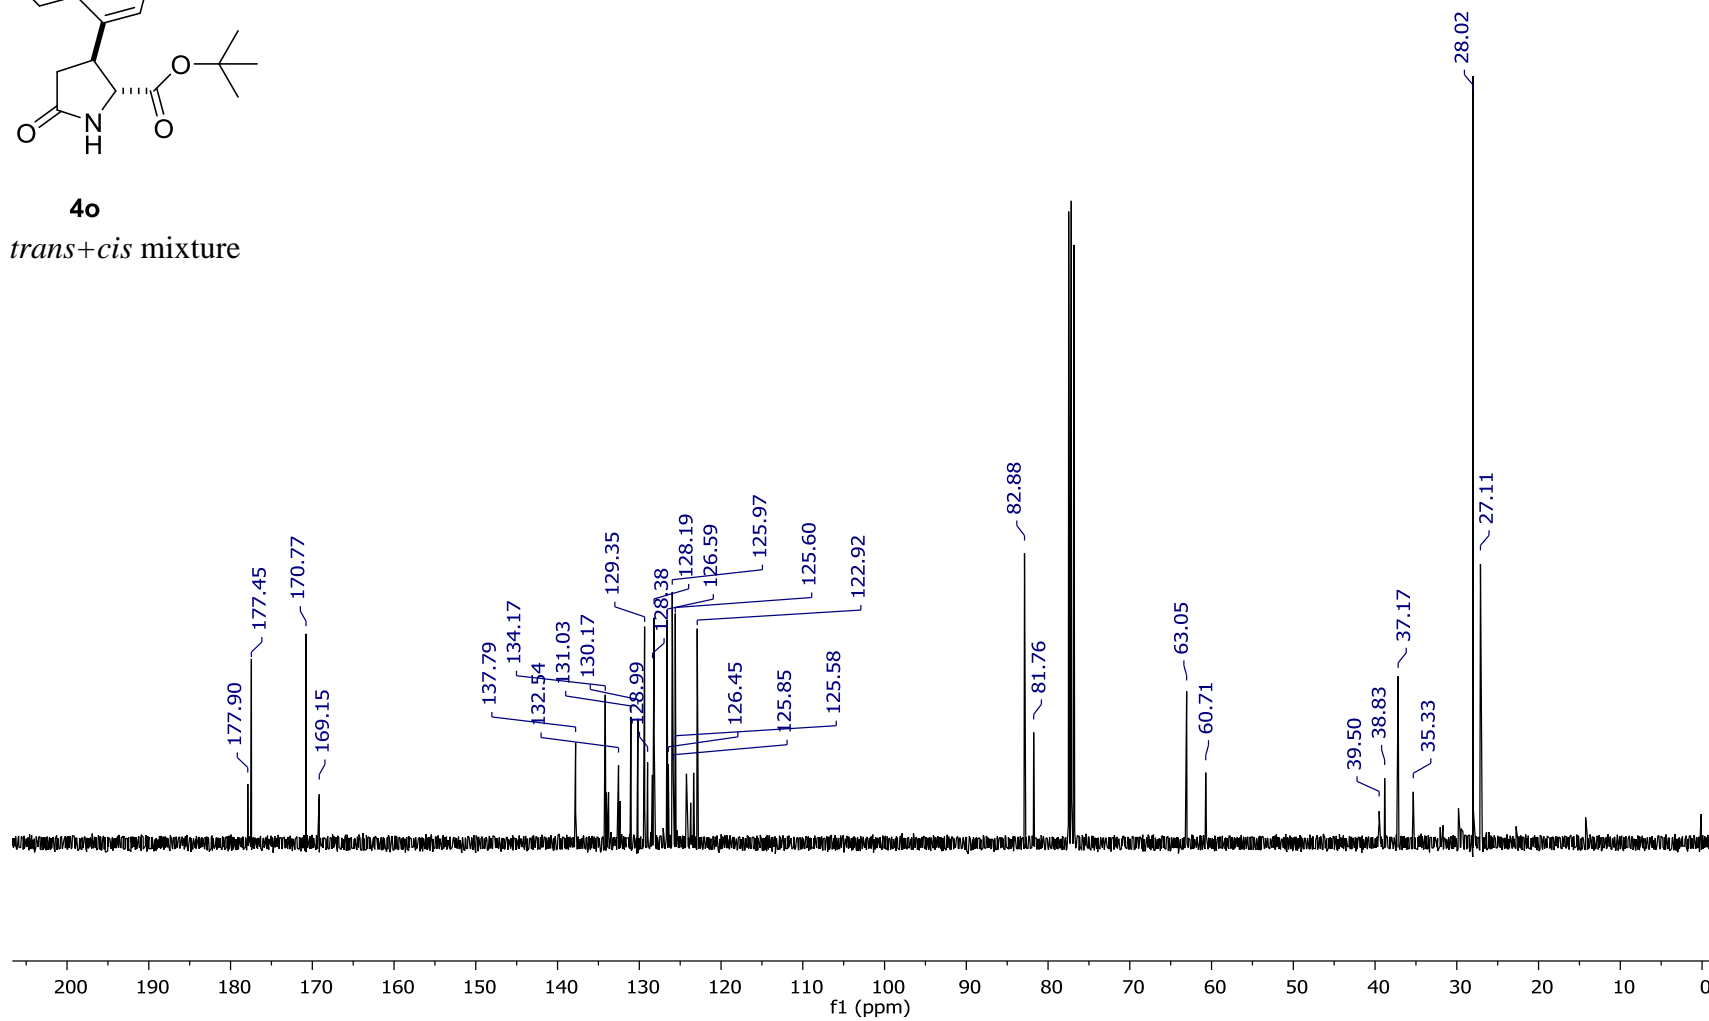

20160830-ADS-162-RGB

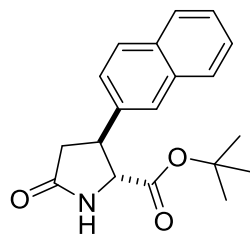

**4p**

*trans/cis* >20:1

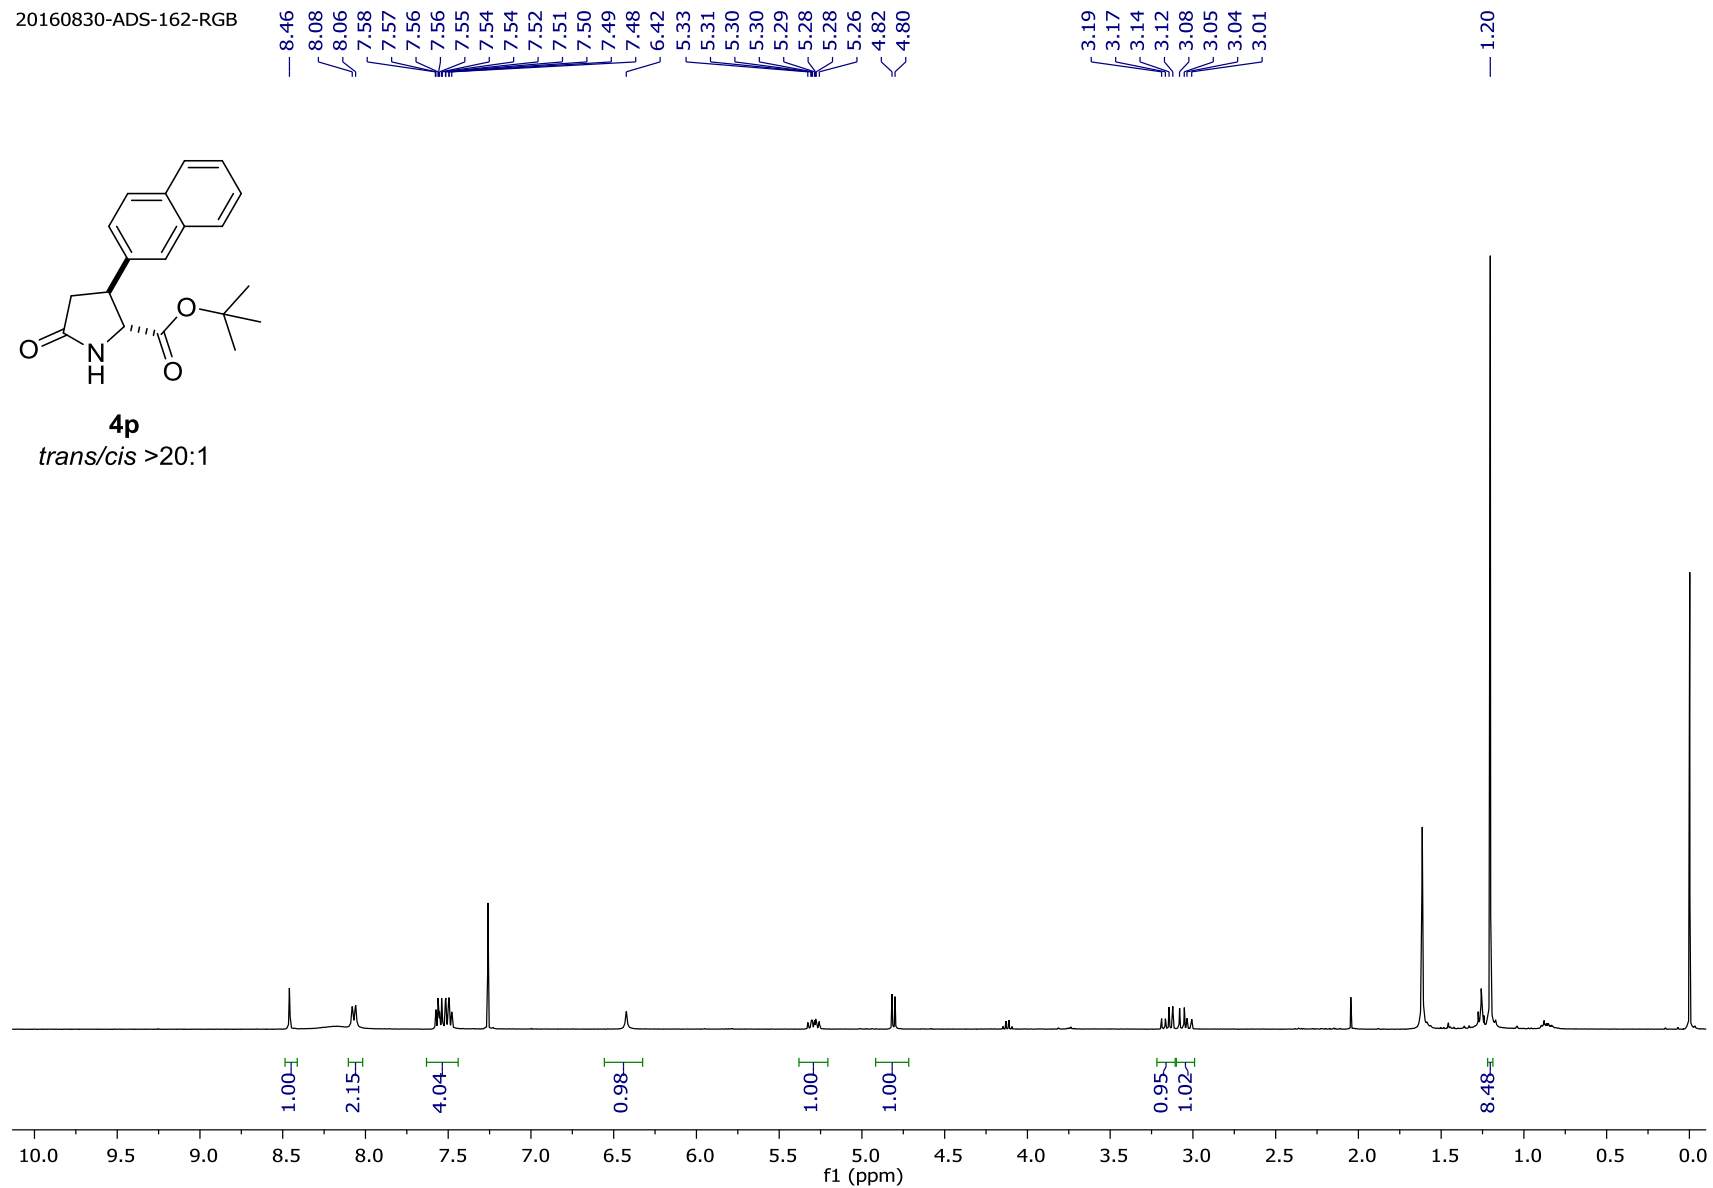



20160830-ADS-162-RGB

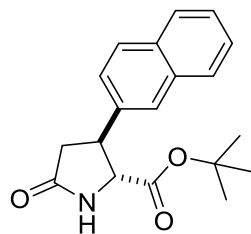

4p

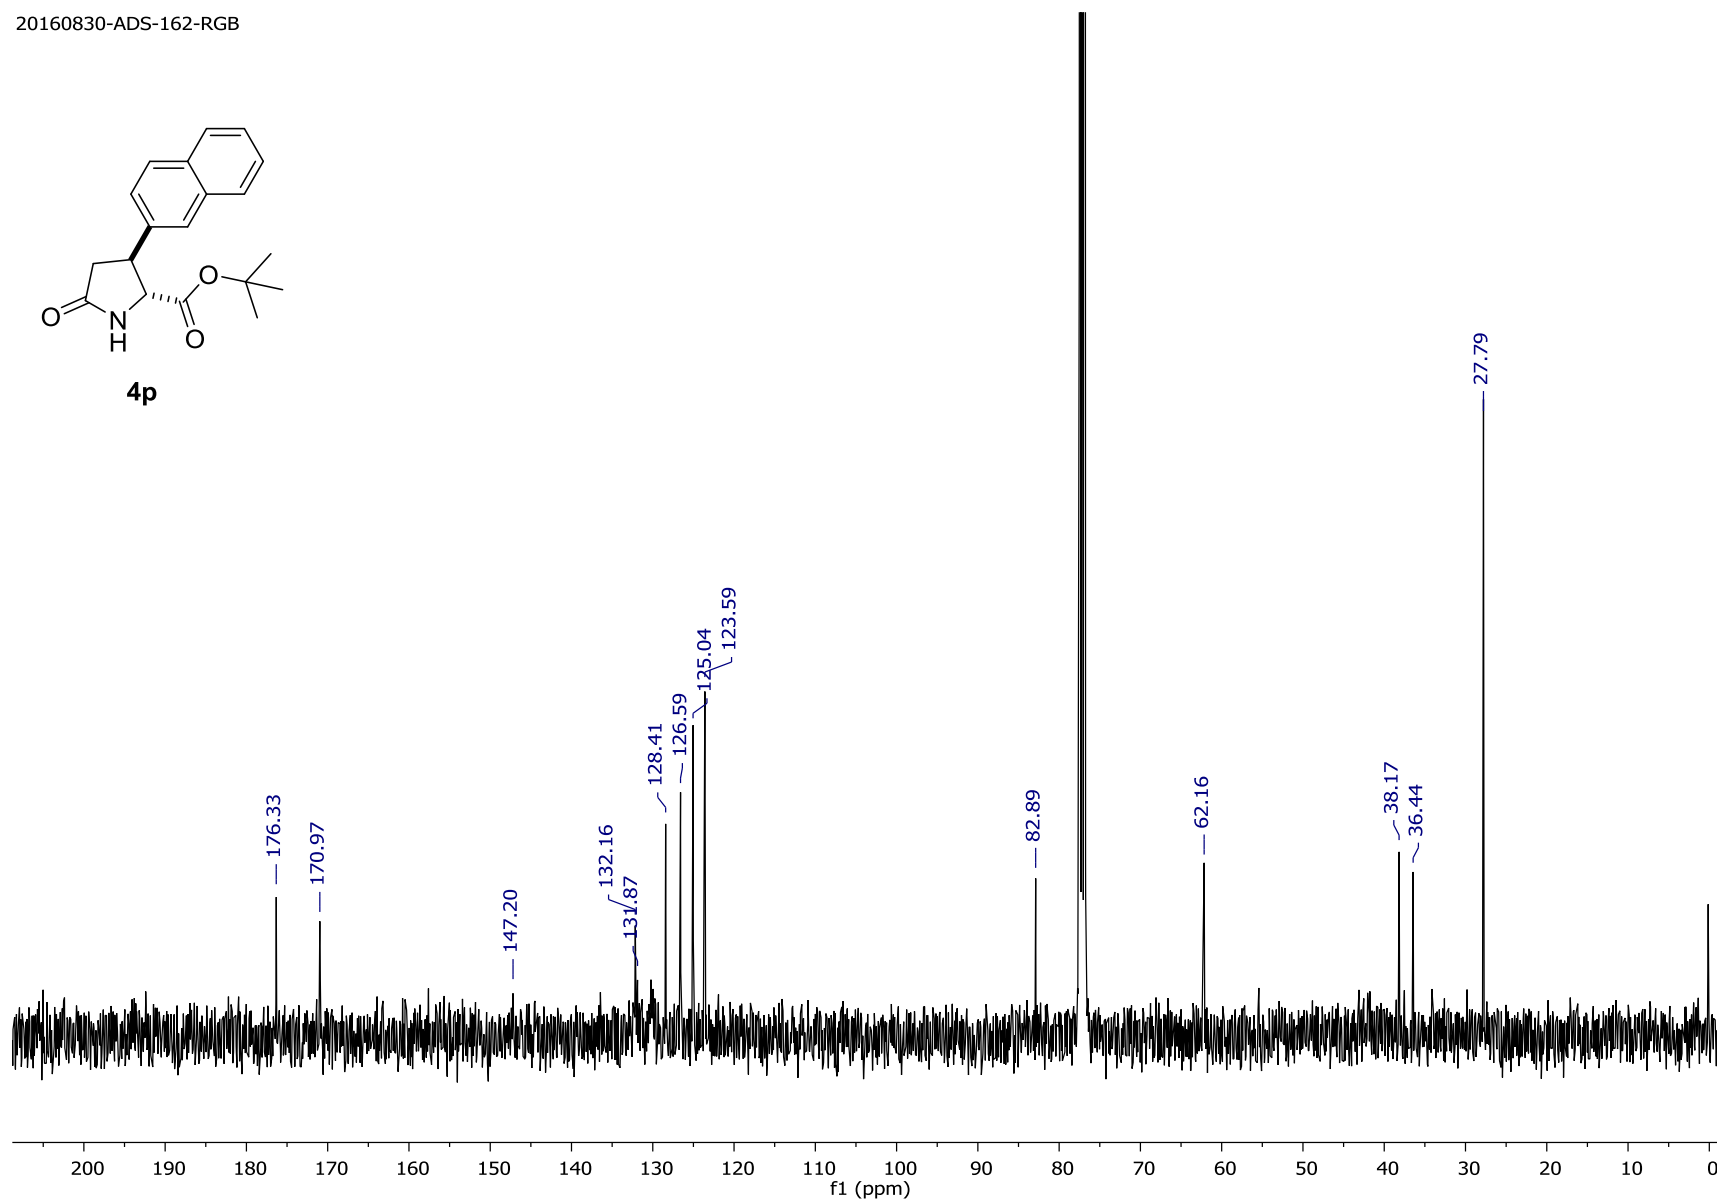

20161228-ADS-FURFURAL-01

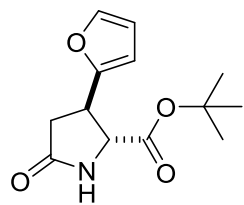

**4q**  
*trans/cis* >20:1

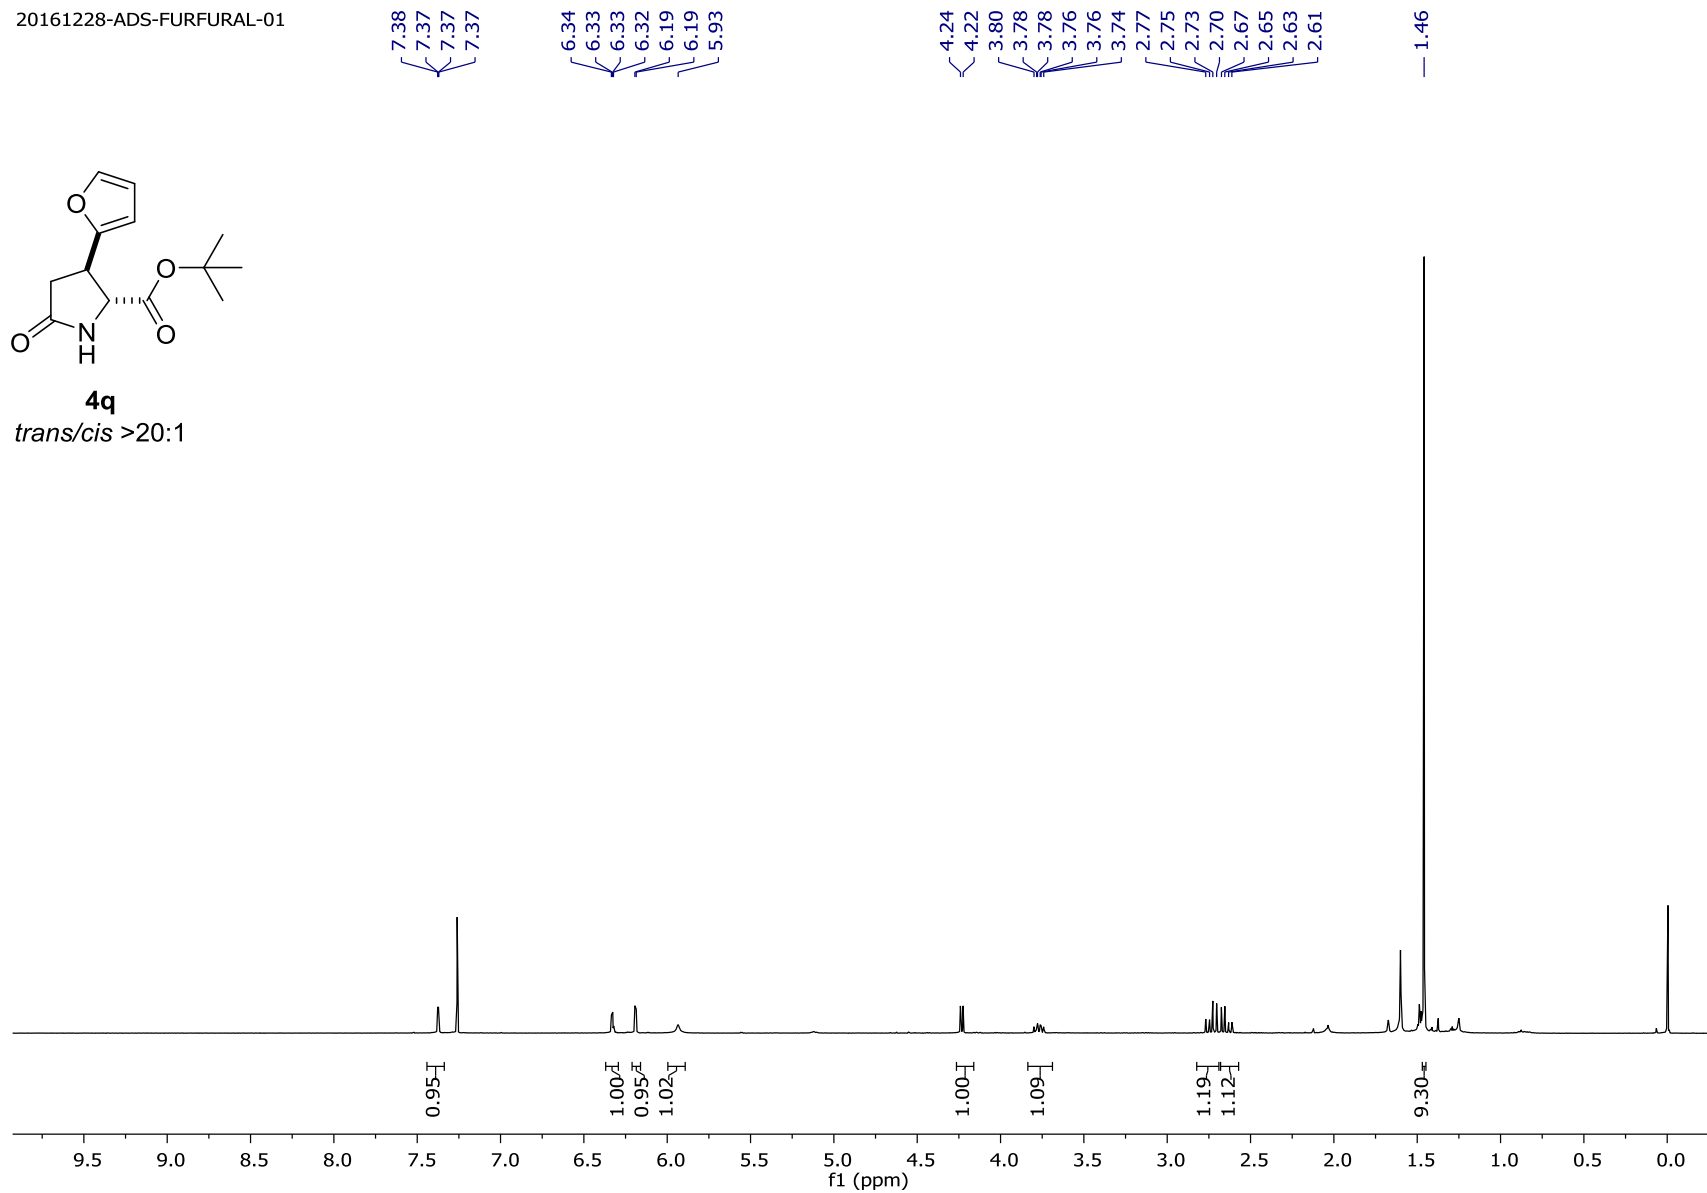

20161228-ADS-FURFURAL-01

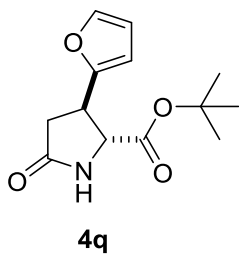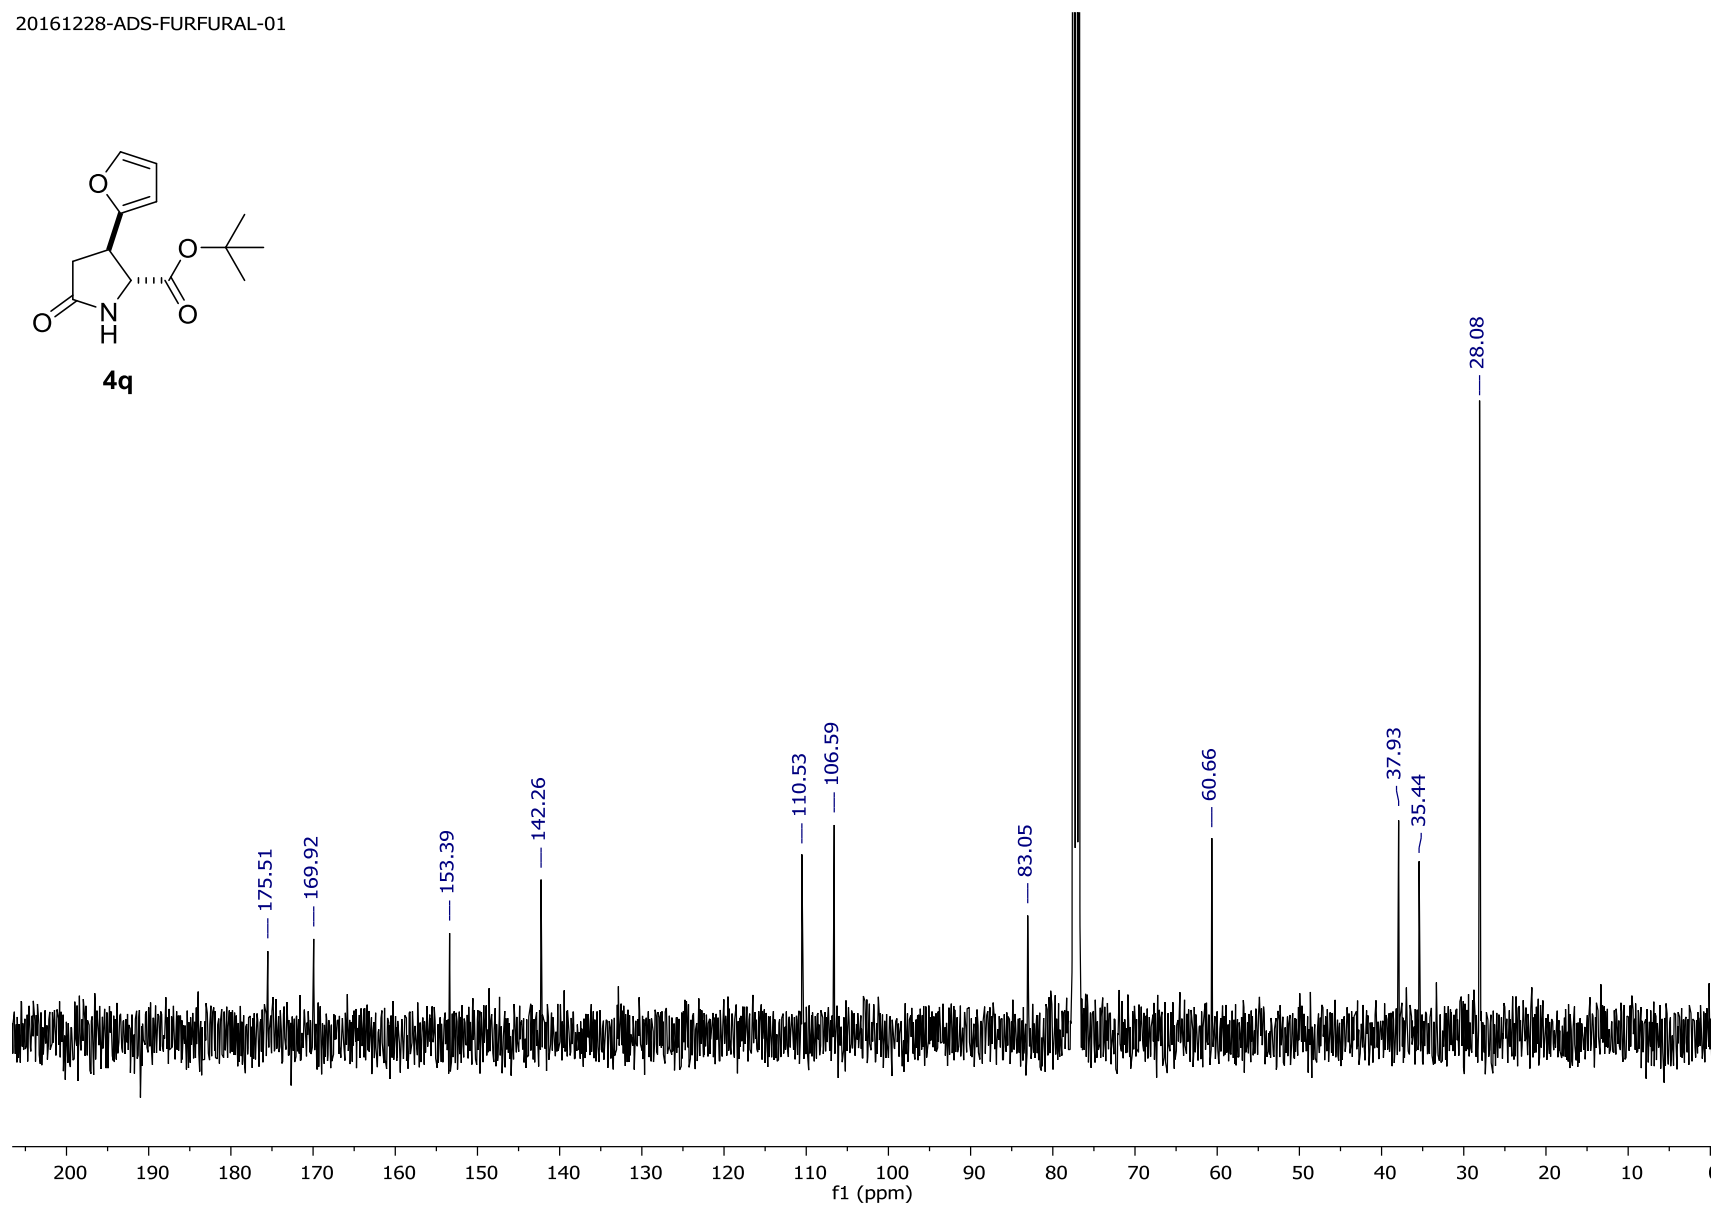

20161219-ADS-THIOPHENE  
ADS-THIOPHENE

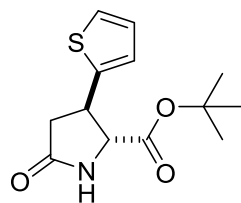

**4r**  
*trans/cis* >20:1

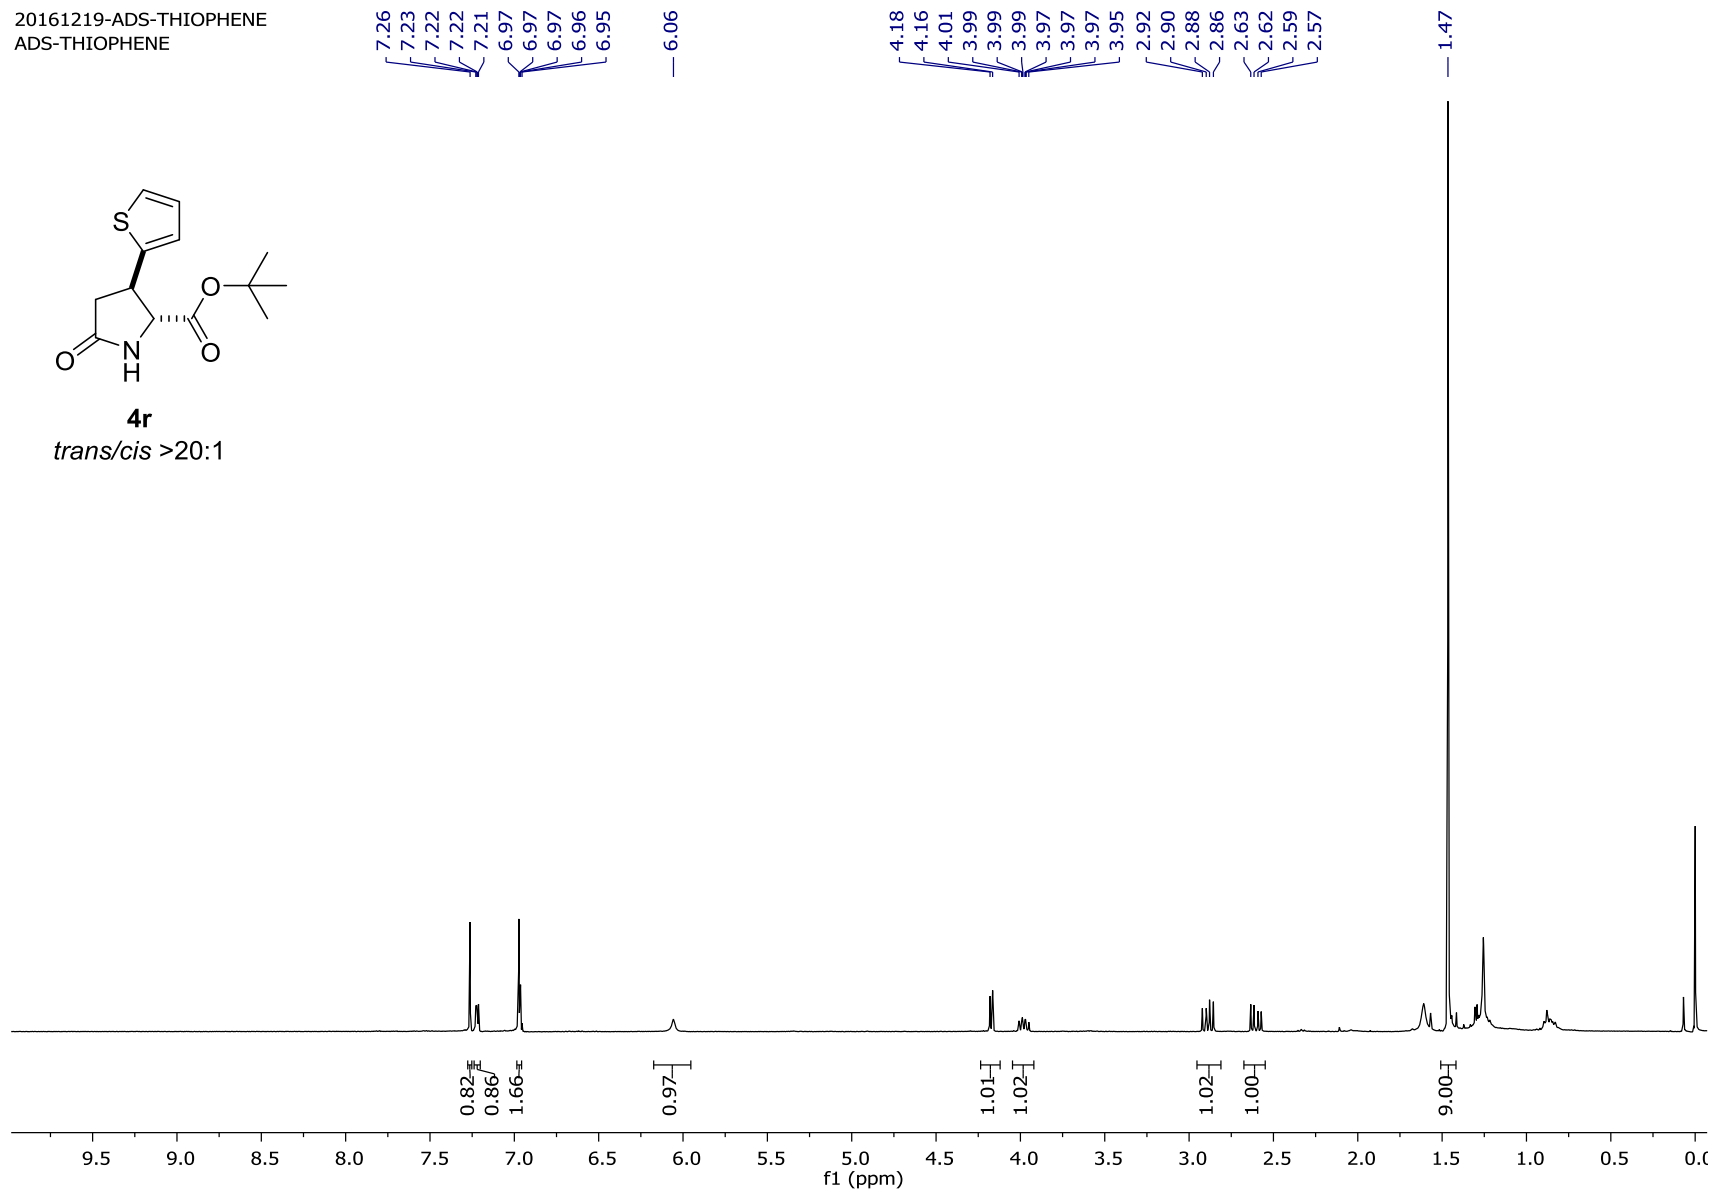

20161220-ADS-THIOPHENE-01

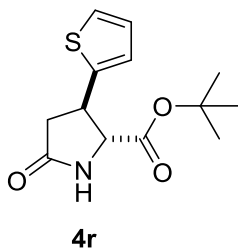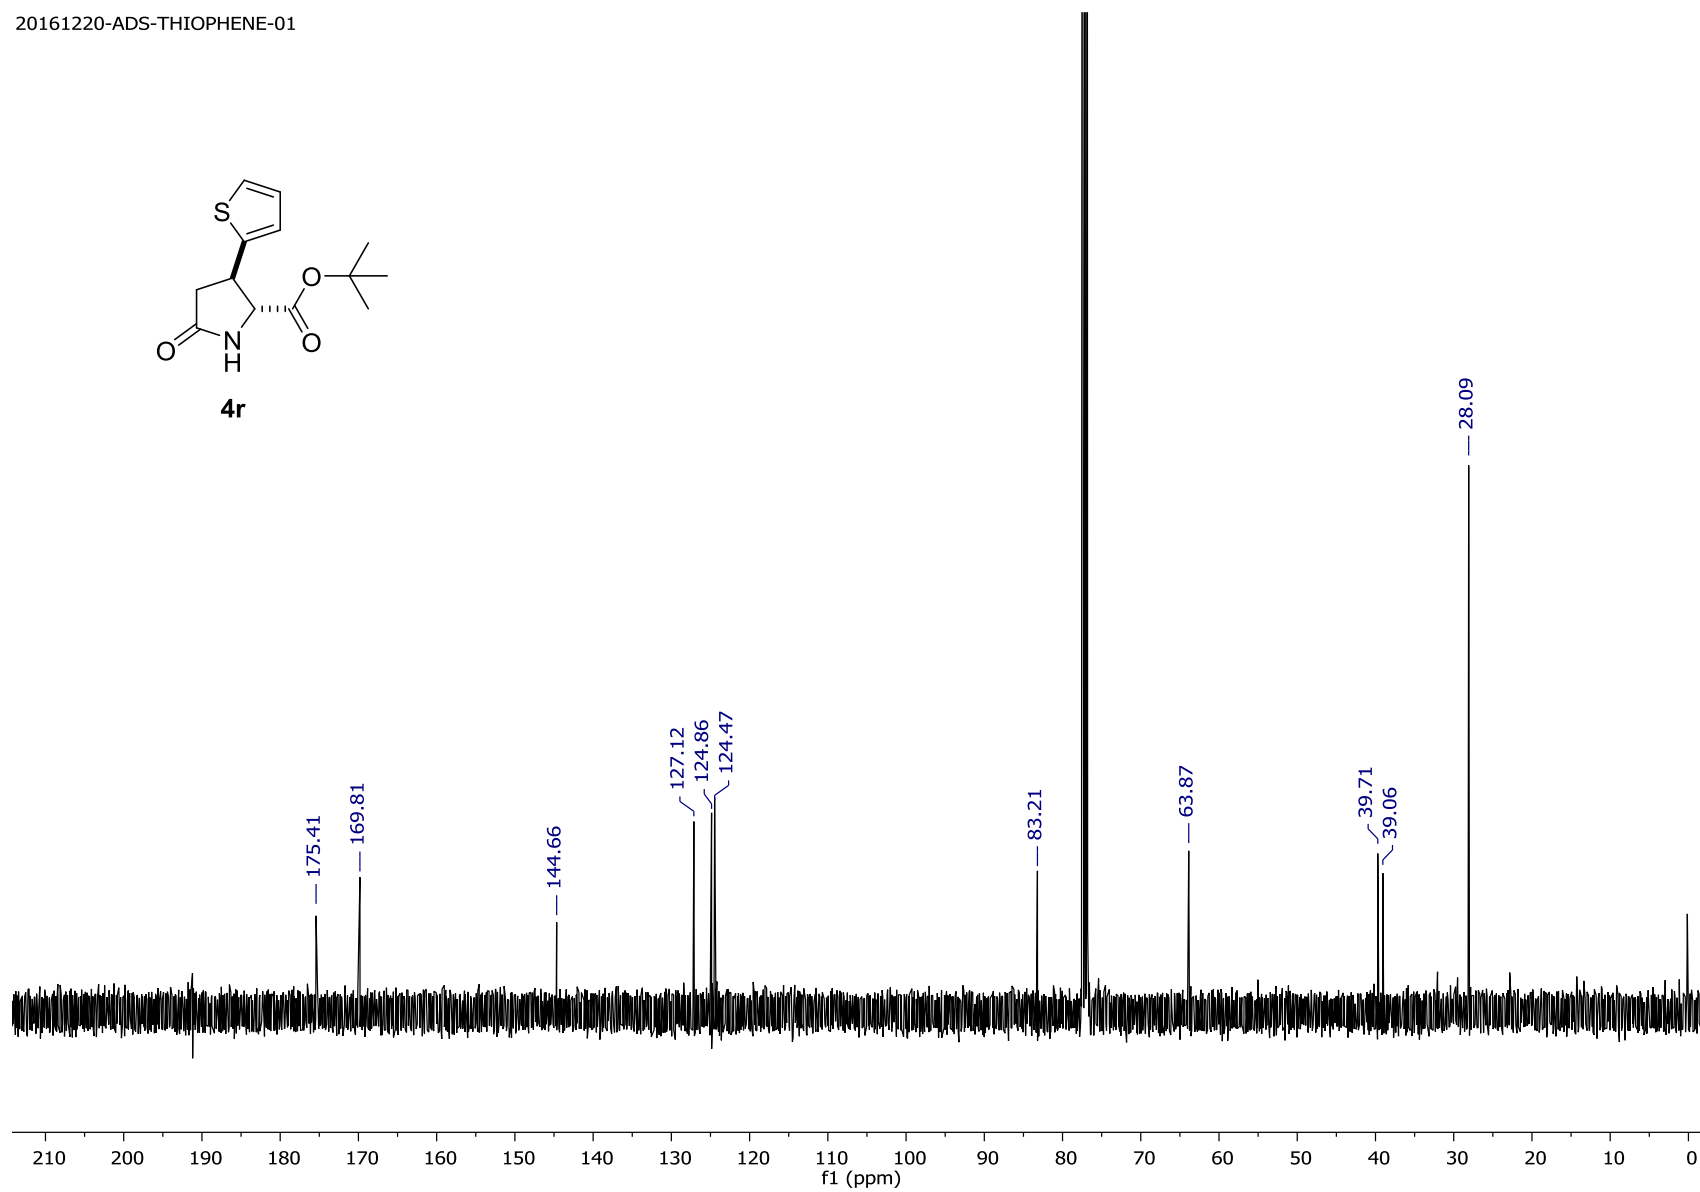

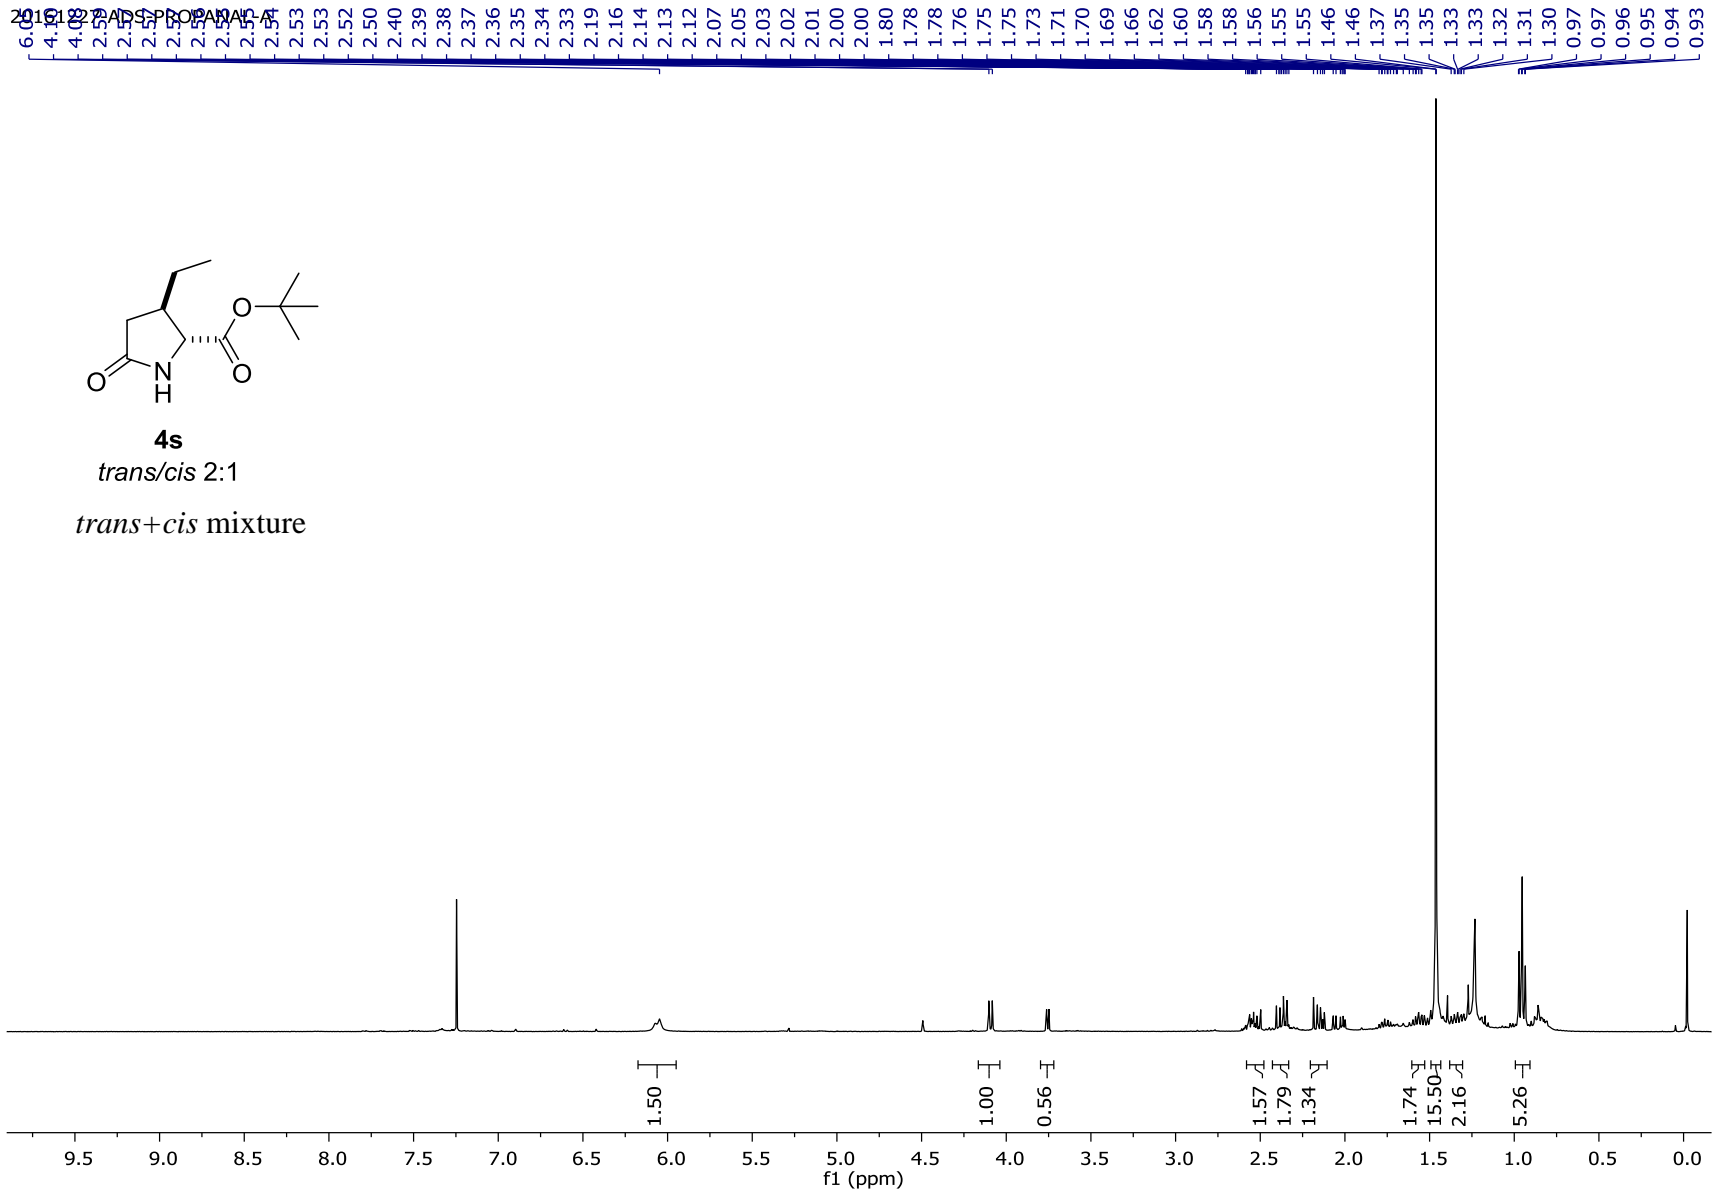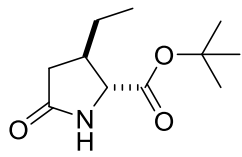

**4s**  
*trans/cis* 2:1  
*trans+cis* mixture

20161227-ADS-PROPANAL-A

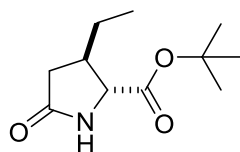

**4s**

*trans+cis* mixture

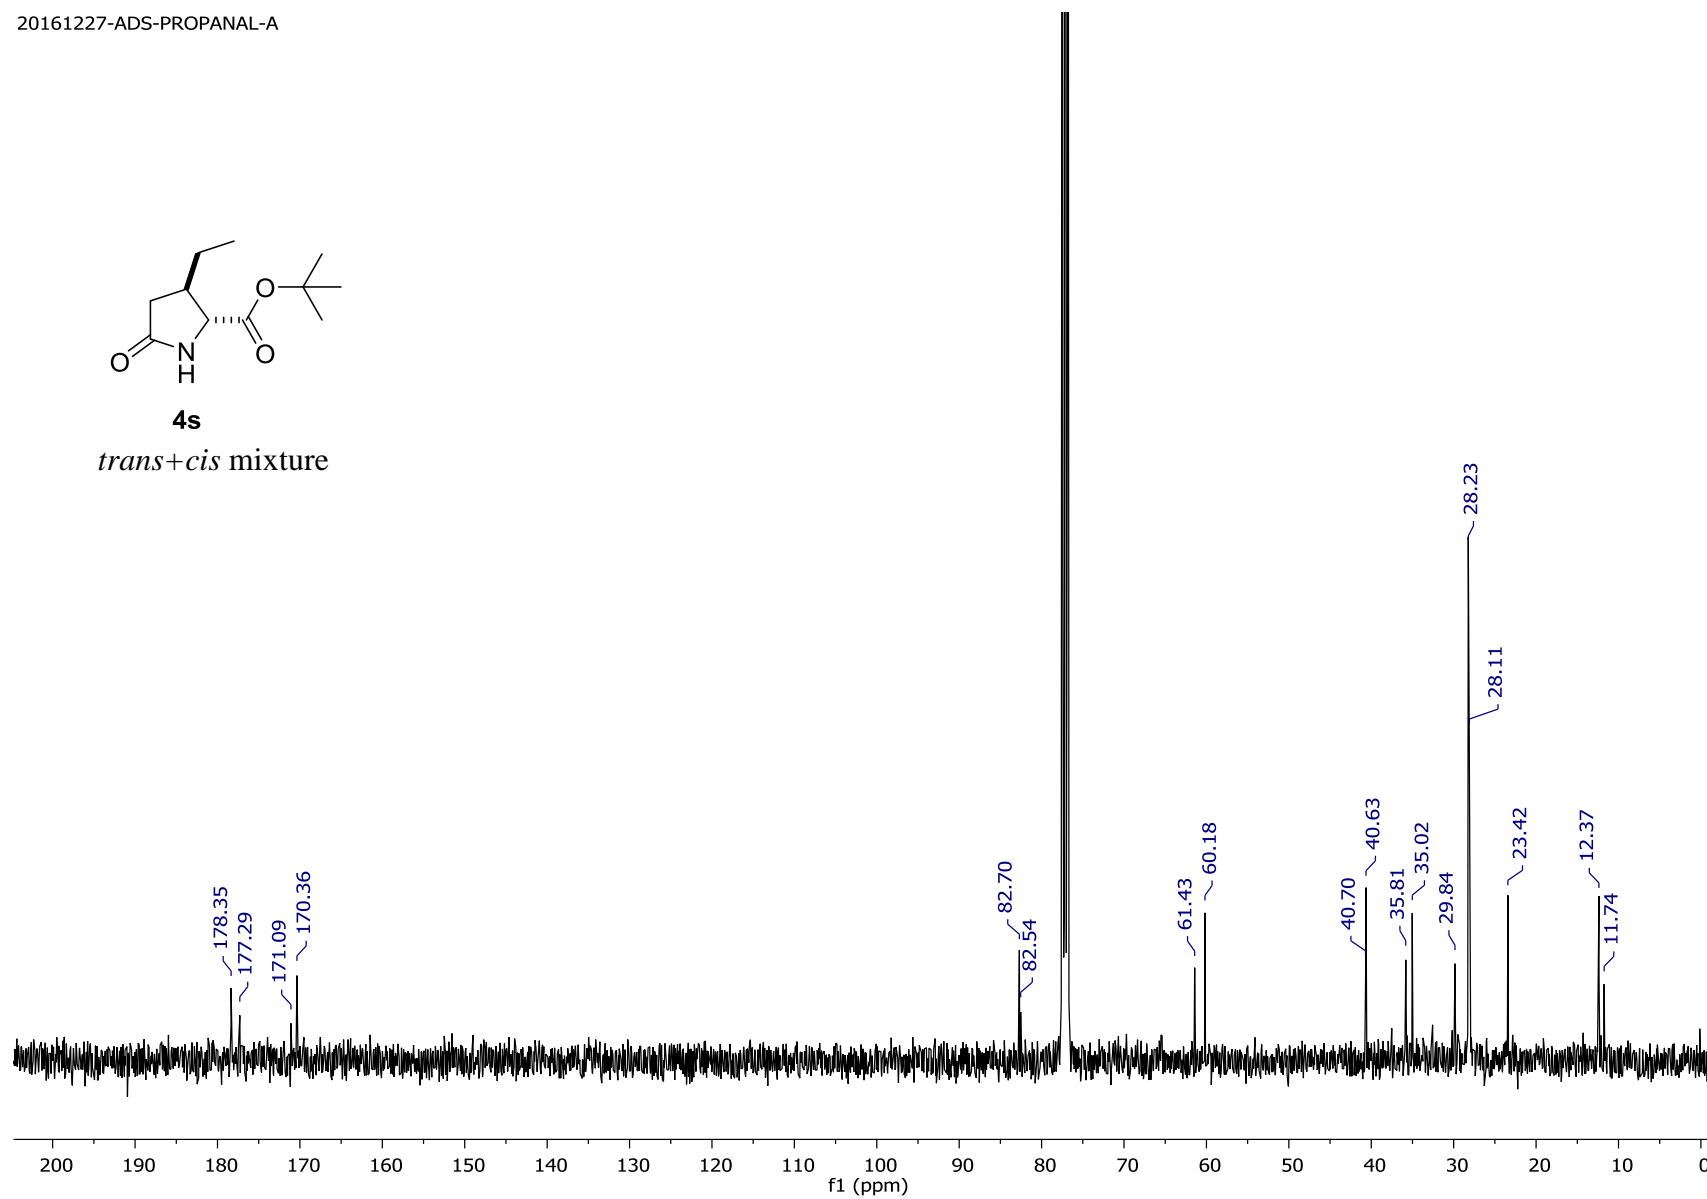

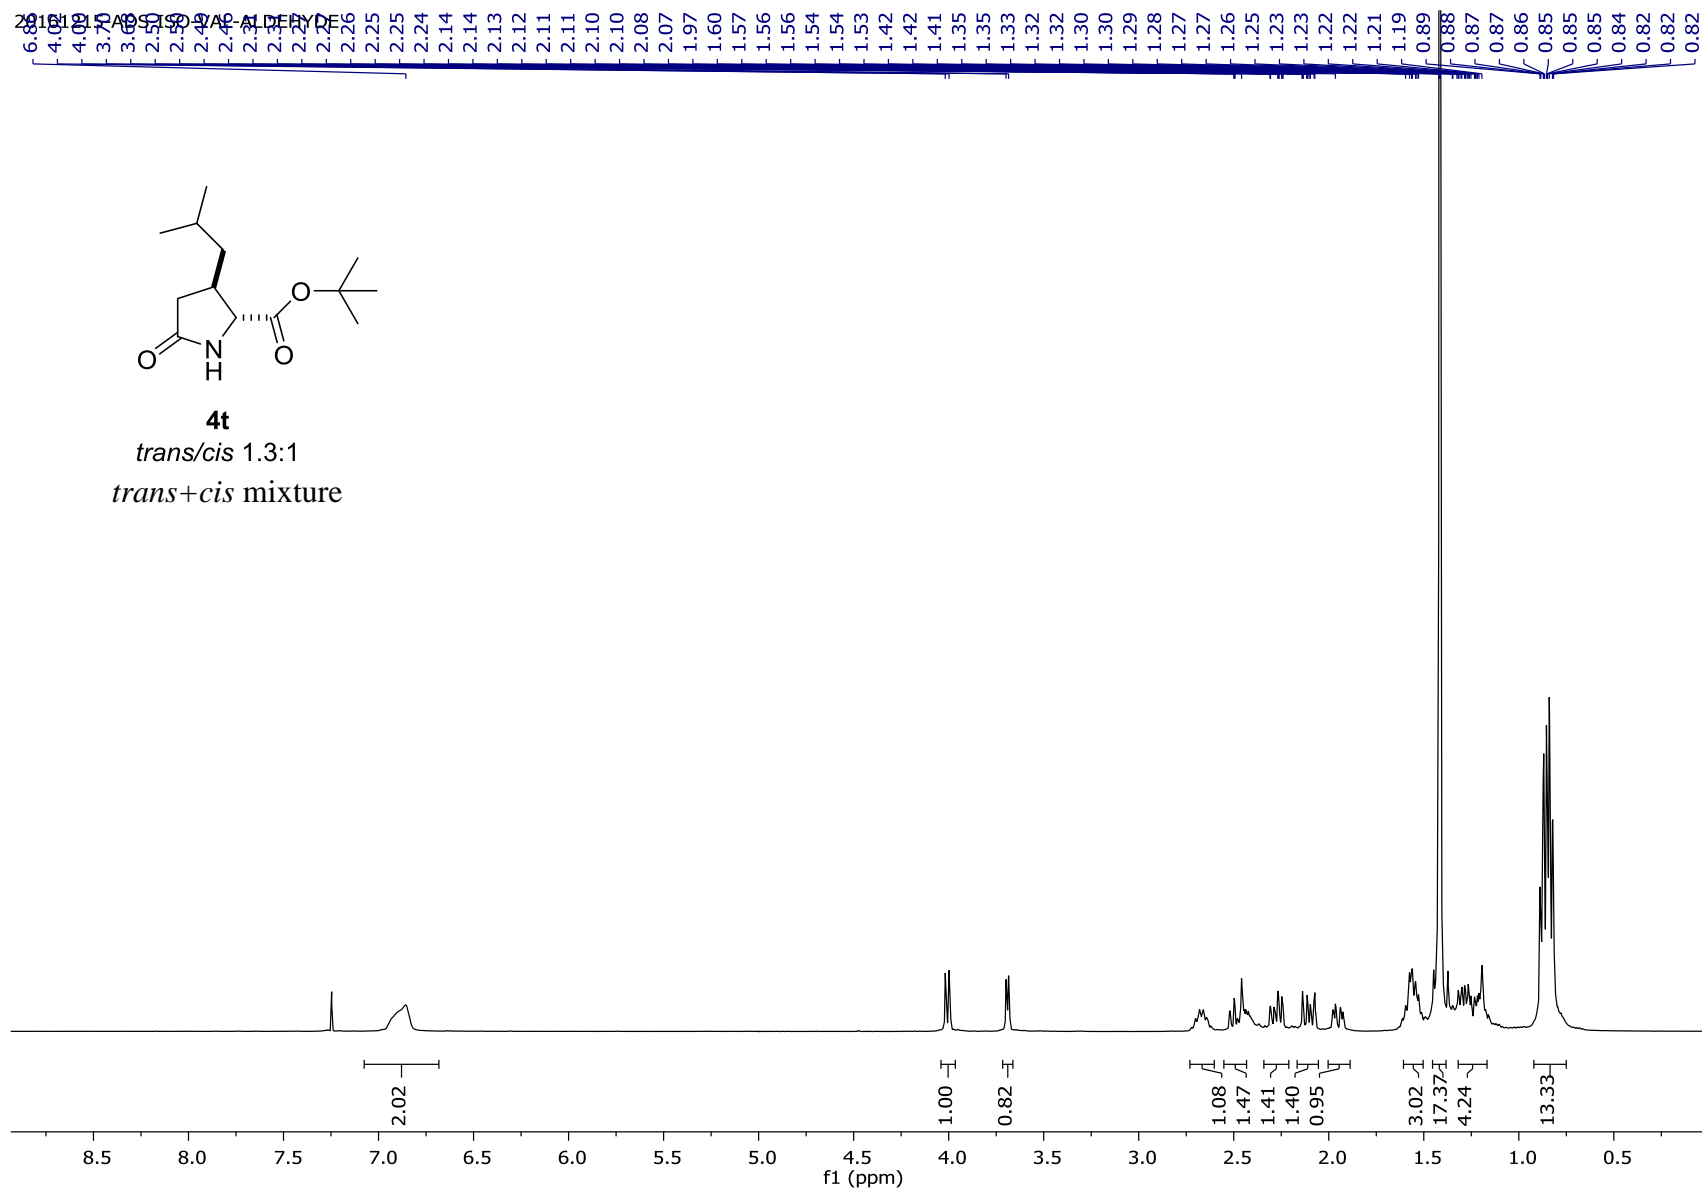



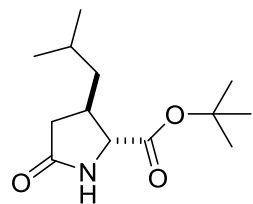

**4t**  
*trans+cis* mixture

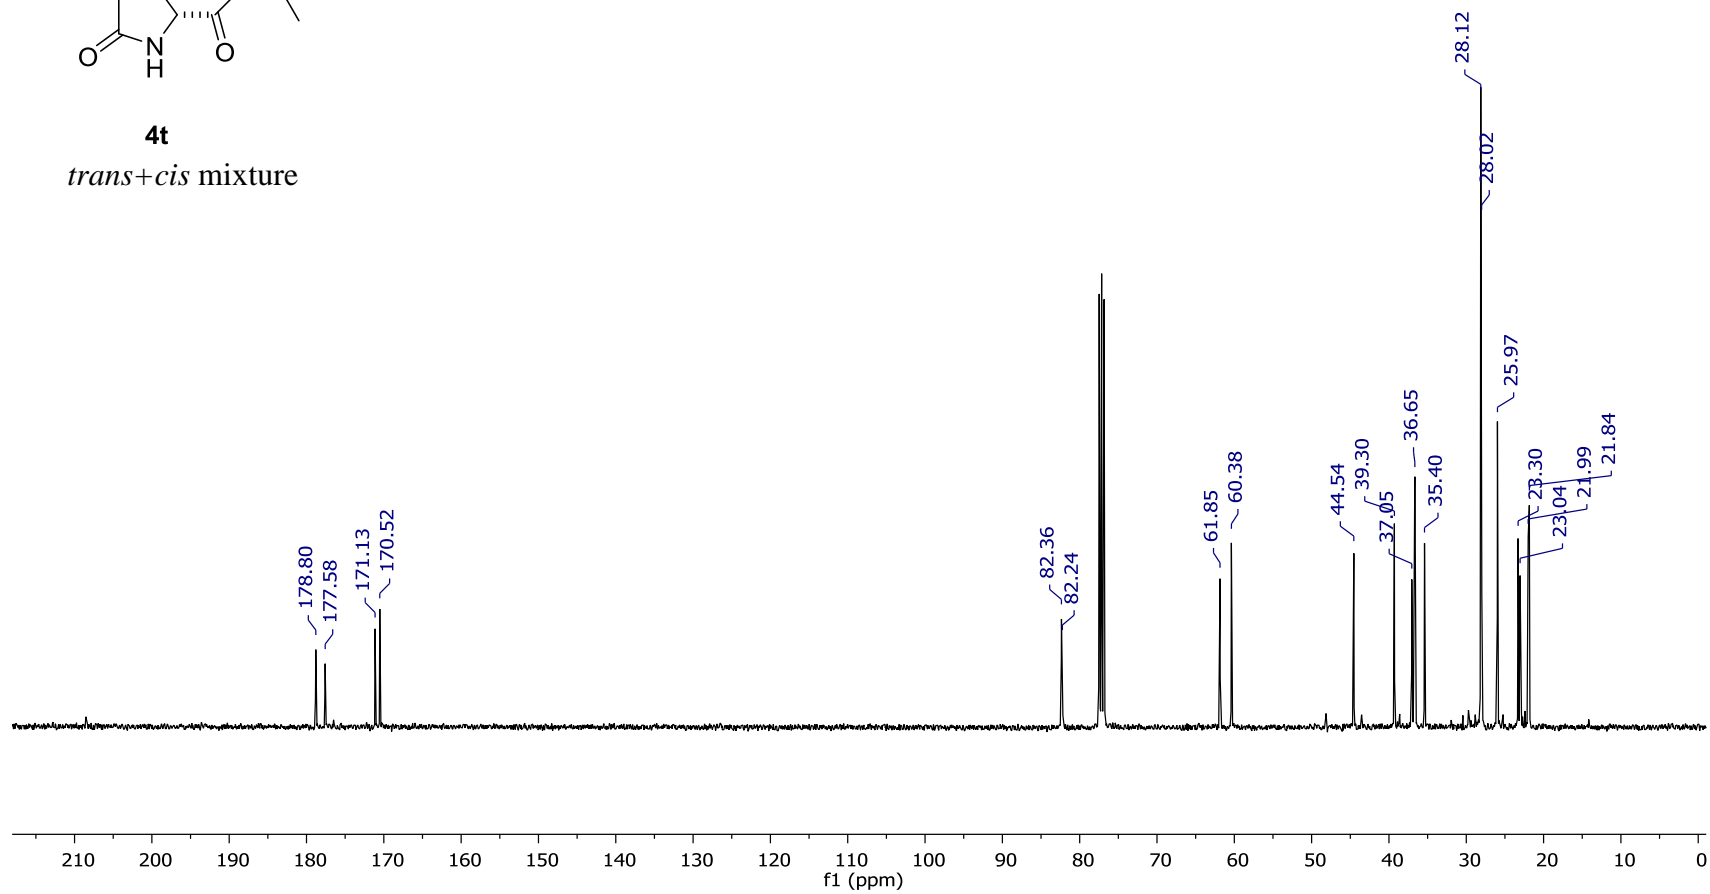



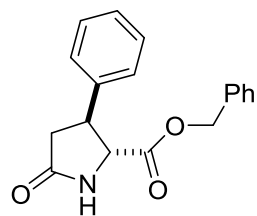

**4u**

*trans+cis* mixture

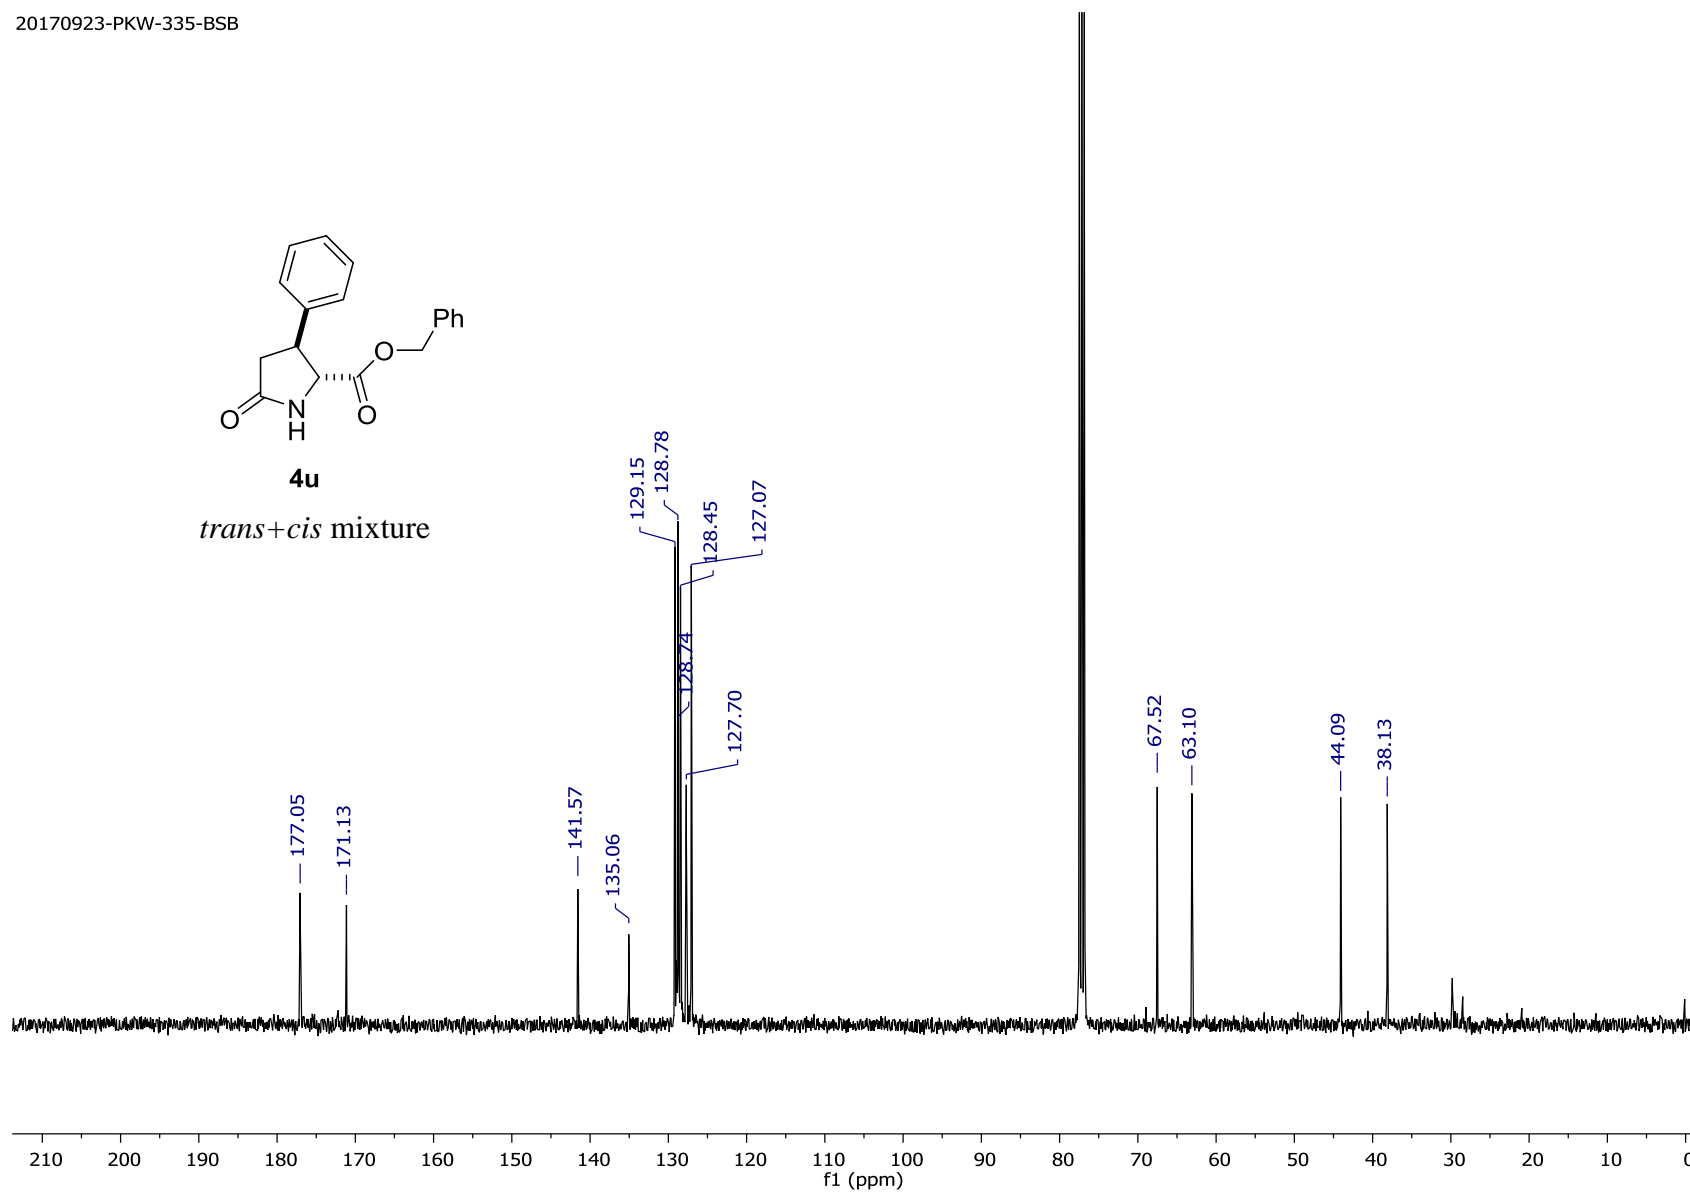

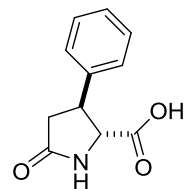

**8**

*trans/cis* >10:1

*trans+cis* mixture

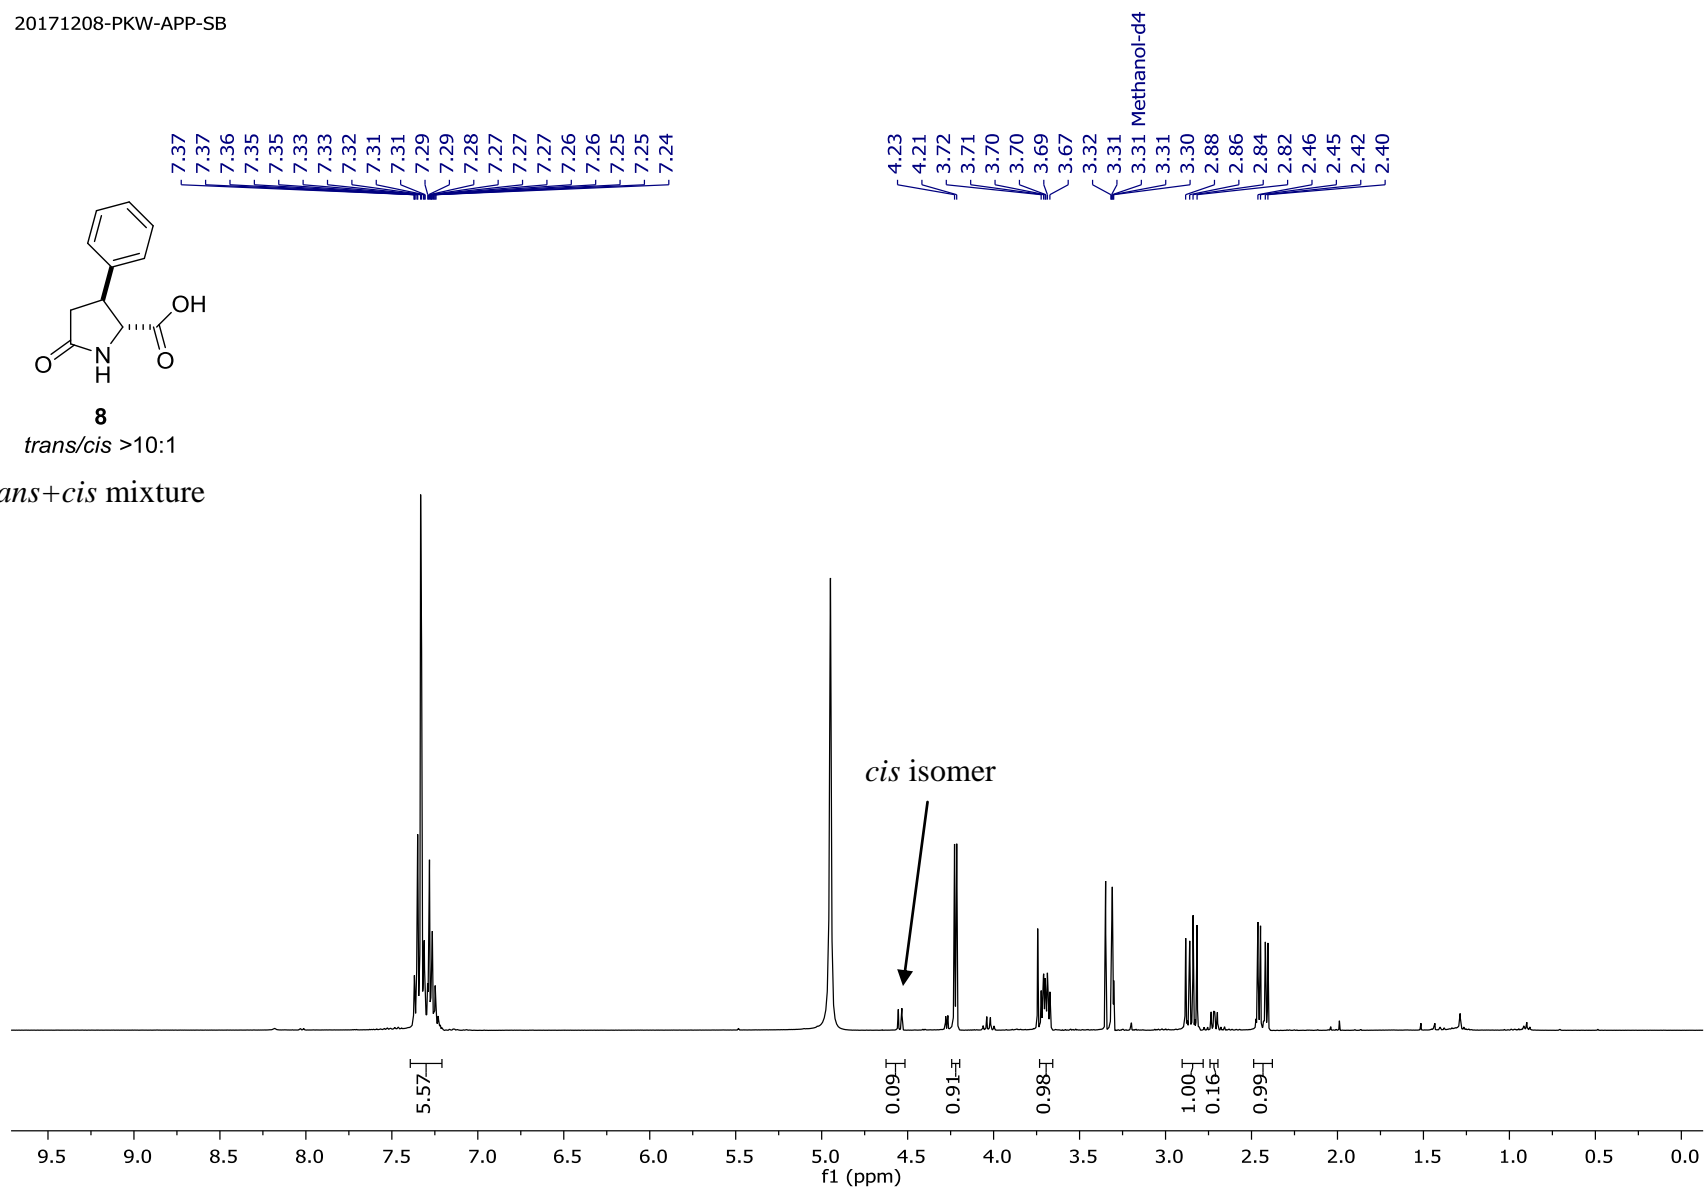

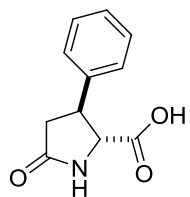

**8**

*trans+cis* mixture

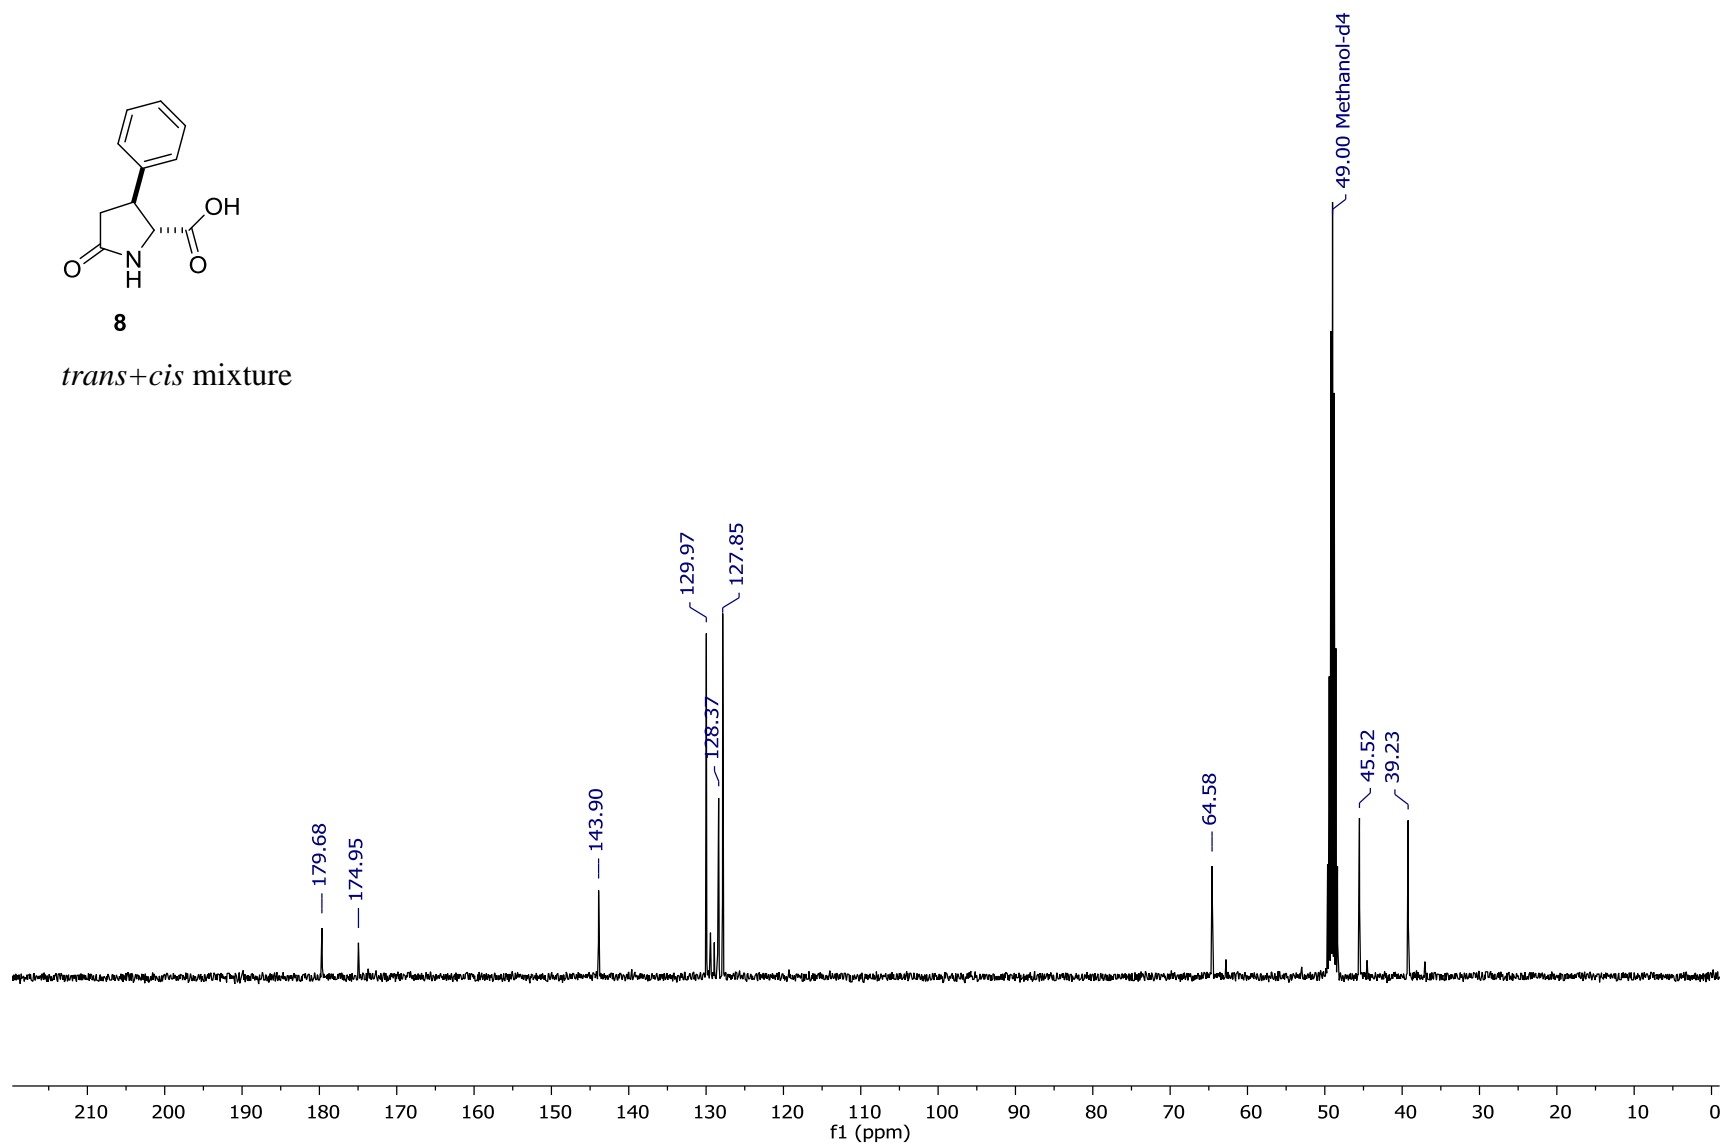

## Crystal Structure data *4a-trans*

No syntax errors found.      CIF dictionary      Interpreting this report

### Datablock: *4a-trans*

---

Bond precision:    C-C = 0.0041 Å                      Wavelength=1.54178

Cell:                      a=10.3681(6)              b=11.3036(6)              c=13.4537(8)  
                                    alpha=90                      beta=111.487(4)              gamma=90

Temperature:              296 K

|                        | Calculated   | Reported     |
|------------------------|--------------|--------------|
| Volume                 | 1467.15(15)  | 1467.15(15)  |
| Space group            | P 21/c       | P 21/c       |
| Hall group             | -P 2ybc      | -P 2ybc      |
| Moiety formula         | C15 H19 N O3 | C15 H19 N O3 |
| Sum formula            | C15 H19 N O3 | C15 H19 N O3 |
| Mr                     | 261.31       | 261.31       |
| Dx, g cm <sup>-3</sup> | 1.183        | 1.183        |
| Z                      | 4            | 4            |
| Mu (mm <sup>-1</sup> ) | 0.667        | 0.667        |
| F000                   | 560.0        | 560.0        |
| F000'                  | 561.72       |              |
| h, k, lmax             | 12, 13, 16   | 12, 13, 16   |
| Nref                   | 2593         | 2593         |
| Tmin, Tmax             | 0.808, 0.905 | 0.105, 0.325 |
| Tmin'                  | 0.808        |              |

Correction method= # Reported T Limits: Tmin=0.105 Tmax=0.325  
AbsCorr = MULTI-SCAN

Data completeness= 1.000                      Theta(max)= 66.642

R(reflections)= 0.0622( 1866)              wR2(reflections)= 0.1845( 2573)

S = 1.045                                      Npar= 175

---

Datablock 4a-trans - ellipsoid plot

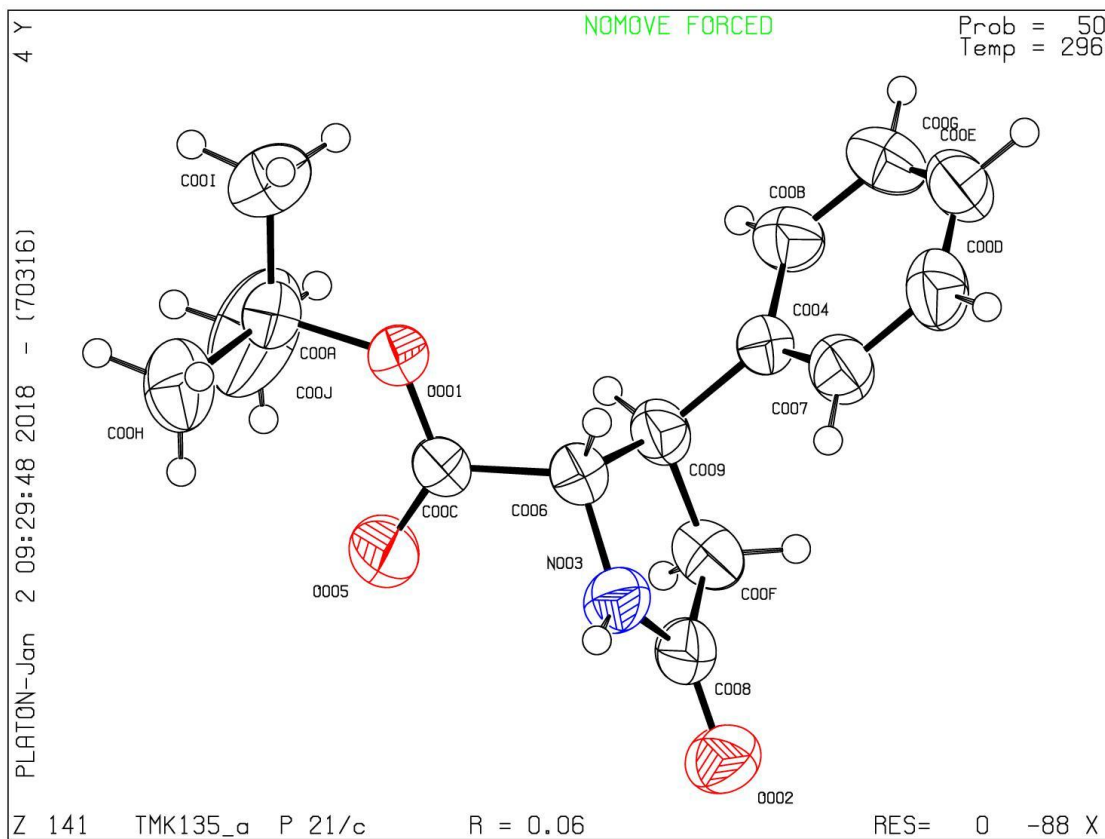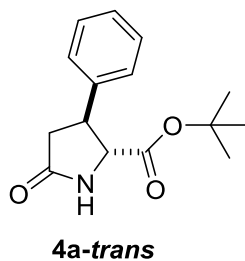

## References

1. C. Alvarez-Ibarra, A. G. Csaky, M. Maroto and M. L. Quiroga, *J. Org. Chem.*, 1995, **60**, 6700-6705.
2. V. A. Soloshonok, C. Cai, V. J. Hruby, L. V. Meervelt and T. Yamazaki, *J. Org. Chem.*, 2000, **65**, 6688-6696.
